# Supplementary material
Source: PubMed Central journal article supplement (PMC2871428)

MS and MS/MS spectra for single  
peptide reconstituted proteins

Manuscript:

**Axonal Transport Proteomics in  
Injured Sciatic Nerve**

Izhak Michaelevski<sup>1,\*</sup>, Katalin F.  
Medzihradszky<sup>2</sup>, Aenoch Lynn<sup>2</sup>, Alma L.  
Burlingame<sup>2</sup>, and Mike Fainzilber<sup>1,\*</sup>

# IRDPNQGGK(iTRAQ4plex)DITEEIM(Oxi)SGAR<sup>+4</sup>/(623.8693<sup>+4</sup>/ 2492.4549)/A0PJB5

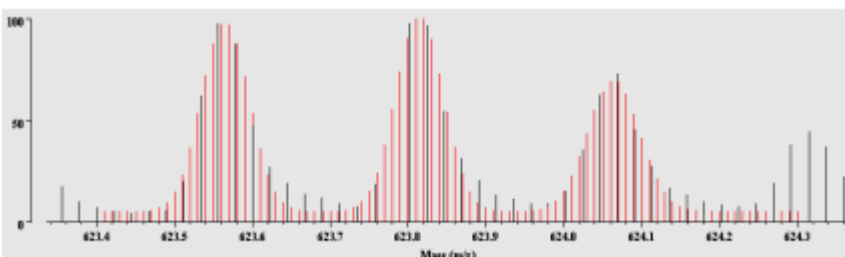

| b        | b+2      | iTRAQ4plex      | y  | y+2               |
|----------|----------|-----------------|----|-------------------|
| 258.1934 | ---      | 1 I             | 20 | ---               |
| 414.2945 | 207.6509 | 2 R             | 19 | 2234.095 1117.551 |
| 529.3215 | 265.1644 | 3 D             | 18 | 2077.994 1039.501 |
| 626.3742 | 313.6907 | 4 P             | 17 | 1962.967 981.9872 |
| 740.4171 | 370.7122 | 5 N             | 16 | 1865.914 933.4608 |
| 868.4757 | 434.7415 | 6 Q             | 15 | 1751.871 876.4393 |
| 925.4972 | 463.2522 | 7 G             | 14 | 1623.813 812.4101 |
| 982.5187 | 491.763  | 8 G             | 13 | 1566.791 783.8993 |
| 1254.716 | 627.8615 | 9 K(iTRAQ4plex) | 12 | 1509.77 755.3886  |
| 1369.743 | 685.3749 | 10 D            | 11 | 1237.573 619.2901 |
| 1482.827 | 741.917  | 11 I            | 10 | 1122.546 561.7766 |
| 1583.874 | 792.4408 | 12 T            | 9  | 1009.462 505.2346 |
| 1712.917 | 856.9621 | 13 E            | 8  | 908.4142 454.7107 |
| 1841.96  | 921.4834 | 14 E            | 7  | 779.3716 390.1894 |
| 1955.044 | 978.0254 | 15 I            | 6  | 650.329 325.6681  |
| 2102.079 | 1051.543 | 16 M(Oxidation) | 5  | 537.245 269.1261  |
| 2189.111 | 1095.059 | 17 S            | 4  | 390.2096 195.6084 |
| 2246.133 | 1123.57  | 18 G            | 3  | 303.1775 152.0924 |
| 2317.17  | 1159.088 | 19 A            | 2  | 246.1561 123.5817 |
| ---      | ---      | 20 R            | 1  | 175.119 88.0631   |

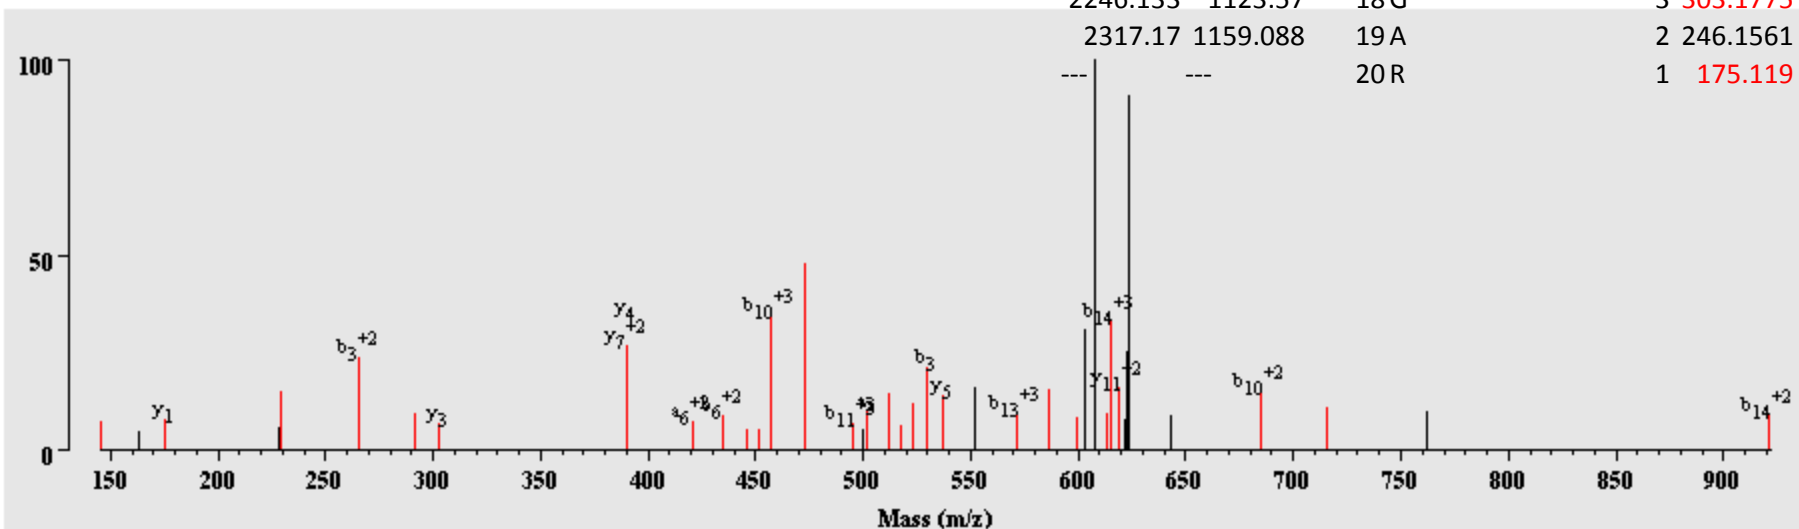

# LALLEEAR<sup>+2</sup>/(530.1238<sup>+2</sup>/1059.2402)/A2AA80

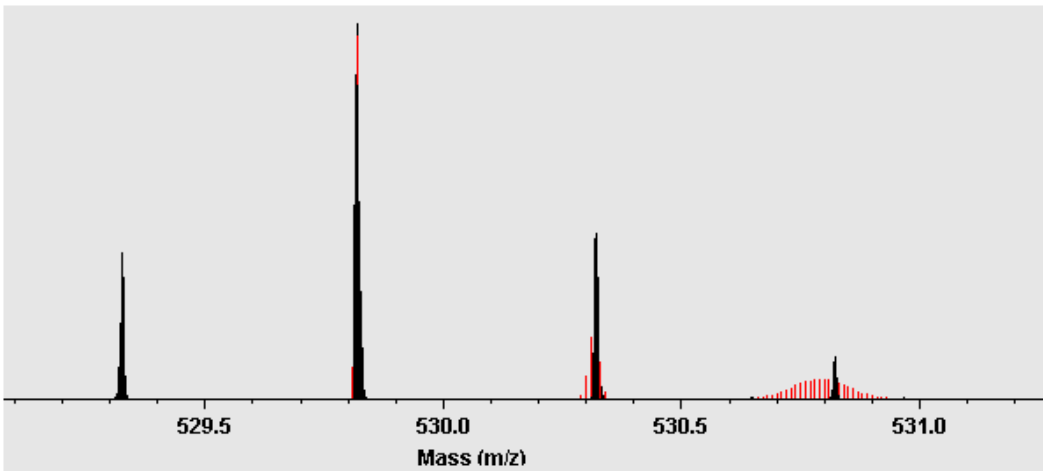

| b        | iTRAQ4plex | y          | y+2      |
|----------|------------|------------|----------|
| 258.1934 | 1L         | 8---       | ---      |
| 329.2305 | 2A         | 7 801.4465 | 401.2269 |
| 442.3146 | 3L         | 6 730.4094 | 365.7083 |
| 555.3986 | 4L         | 5 617.3253 | 309.1663 |
| 684.4412 | 5E         | 4 504.2413 | 252.6243 |
| 813.4838 | 6E         | 3 375.1987 | 188.103  |
| 884.5209 | 7A         | 2 246.1561 | 123.5817 |
| ---      | 8R         | 1 175.119  | 88.0631  |

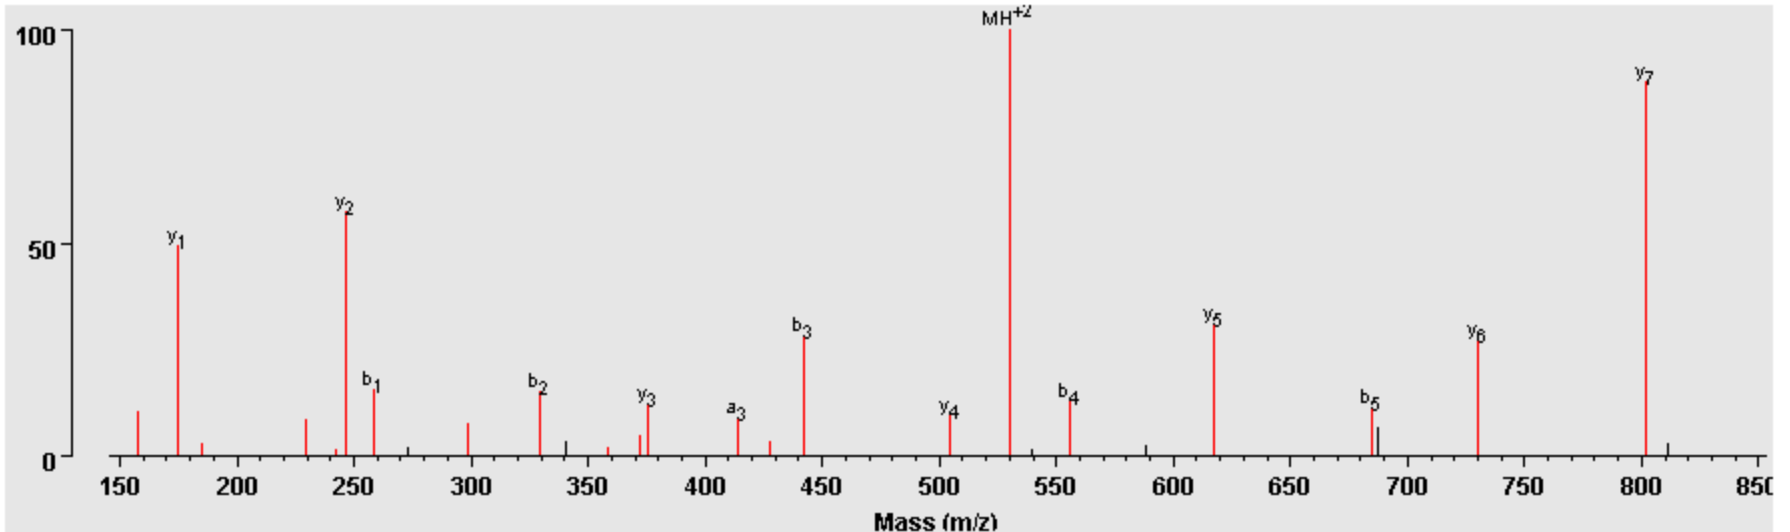

# LIEILSEK(iTRAQ4)<sup>+2</sup>/(616.8871<sup>+2</sup>/1233.32)/A2AVJ7

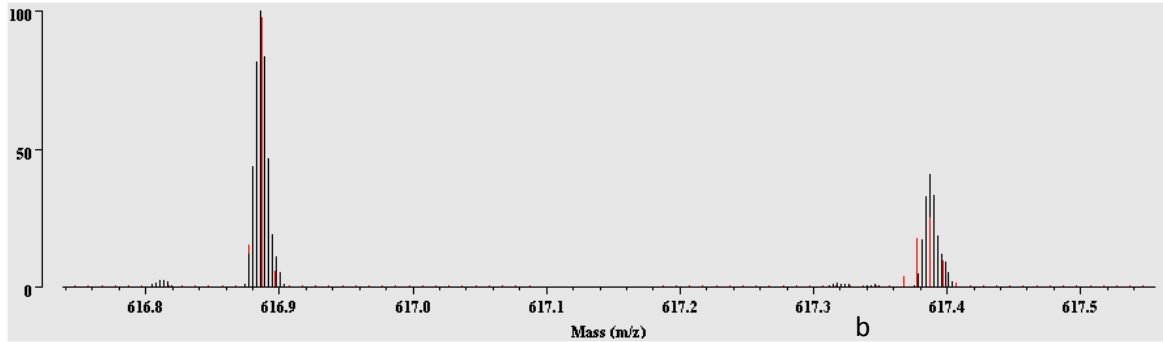

|  | b        | iTRAQ4plex     | y          | y+2      |
|--|----------|----------------|------------|----------|
|  | 258.1934 | 1L             | 8---       | ---      |
|  | 371.2775 | 2I             | 7 975.5843 | 488.2958 |
|  | 500.3201 | 3E             | 6 862.5002 | 431.7537 |
|  | 613.4041 | 4I             | 5 733.4576 | 367.2324 |
|  | 726.4882 | 5L             | 4 620.3736 | 310.6904 |
|  | 813.5202 | 6S             | 3 507.2895 | 254.1484 |
|  | 942.5628 | 7E             | 2 420.2575 | 210.6324 |
|  | ---      | 8K(iTRAQ4plex) | 1 291.2149 | 146.1111 |

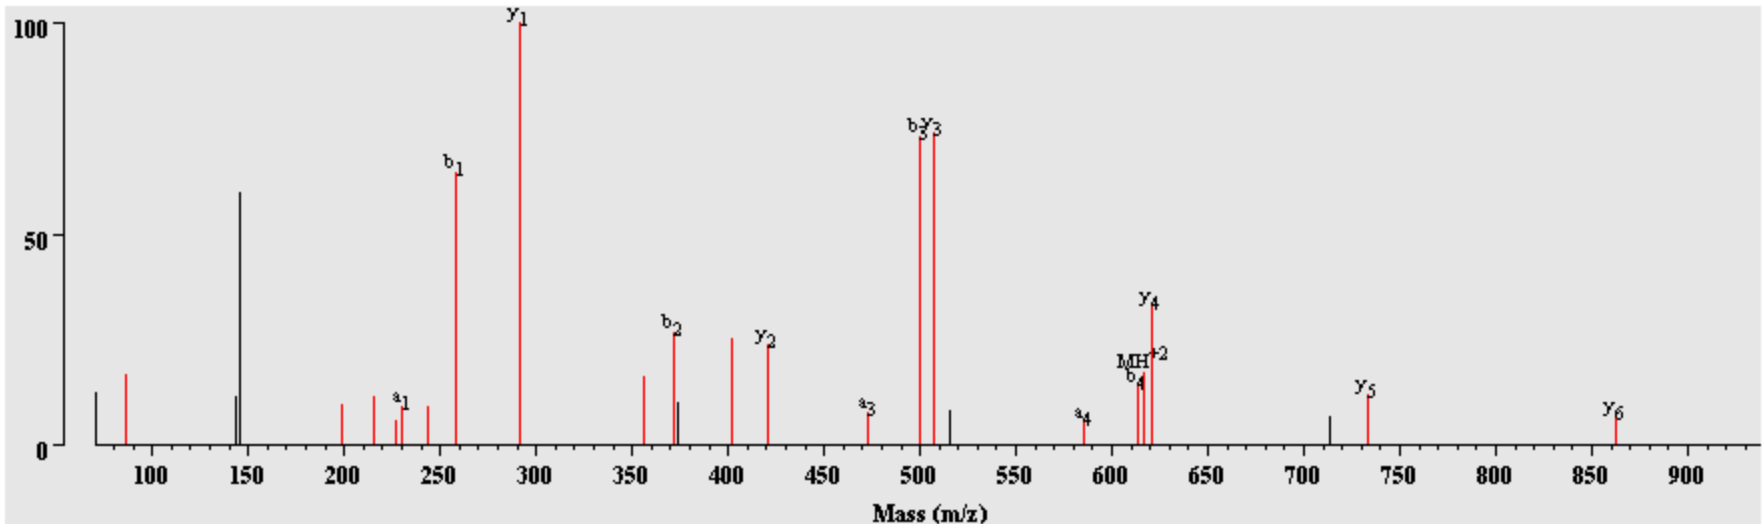

# GIAGLG DVAEVR<sup>+2</sup>/(651.2418<sup>+2</sup>/1301.4762)/A2AWQ5

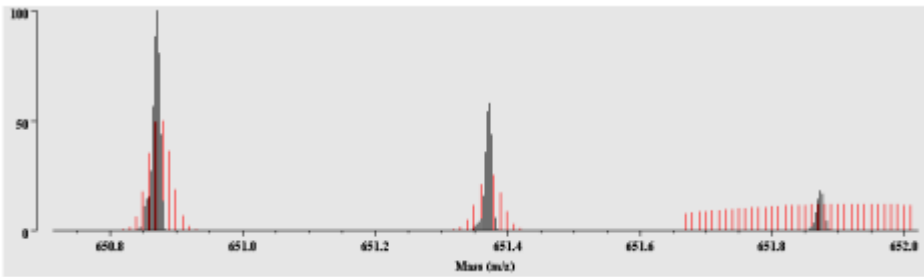

| b        | iTRAQ4plex | y           | y+2      |
|----------|------------|-------------|----------|
| 202.1308 | 1 G        | 12 ---      | ---      |
| 315.2149 | 2 I        | 11 1099.611 | 550.3089 |
| 386.252  | 3 A        | 10 986.5265 | 493.7669 |
| 443.2734 | 4 G        | 9 915.4894  | 458.2483 |
| 556.3575 | 5 L        | 8 858.468   | 429.7376 |
| 613.379  | 6 G        | 7 745.3839  | 373.1956 |
| 728.4059 | 7 D        | 6 688.3624  | 344.6849 |
| 827.4743 | 8 V        | 5 573.3355  | 287.1714 |
| 898.5114 | 9 A        | 4 474.2671  | 237.6372 |
| 1027.554 | 10 E       | 3 403.23    | 202.1186 |
| 1126.622 | 11 V       | 2 274.1874  | 137.5973 |
| ---      | 12 R       | 1 175.119   | 88.0631  |

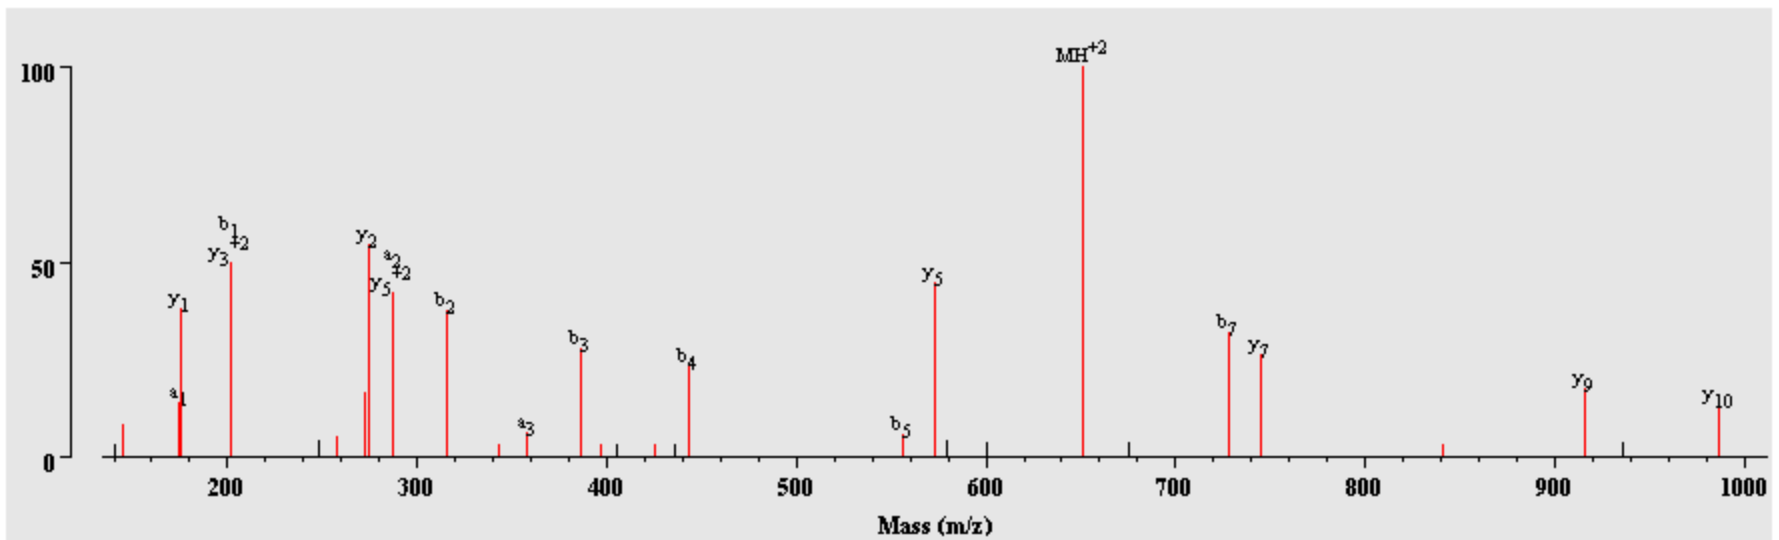

# VPPPPLAPR<sup>+2</sup>/(544.6679<sup>+2</sup>/1088.3283)/A2BDX3

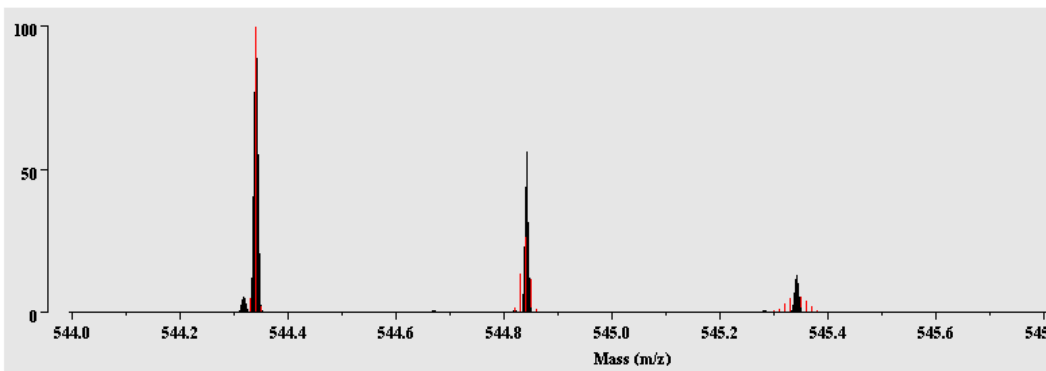

| b        | iTRAQ4plex | y          | y+2      |
|----------|------------|------------|----------|
| 244.1778 | 1V         | 9---       | ---      |
| 341.2305 | 2P         | 8 844.5039 | 422.7556 |
| 438.2833 | 3P         | 7 747.4512 | 374.2292 |
| 535.336  | 4P         | 6 650.3984 | 325.7028 |
| 632.3888 | 5P         | 5 553.3457 | 277.1765 |
| 745.4729 | 6L         | 4 456.2929 | 228.6501 |
| 816.51   | 7A         | 3 343.2088 | 172.1081 |
| 913.5627 | 8P         | 2 272.1717 | 136.5895 |
| ---      | 9R         | 1 175.119  | 88.0631  |

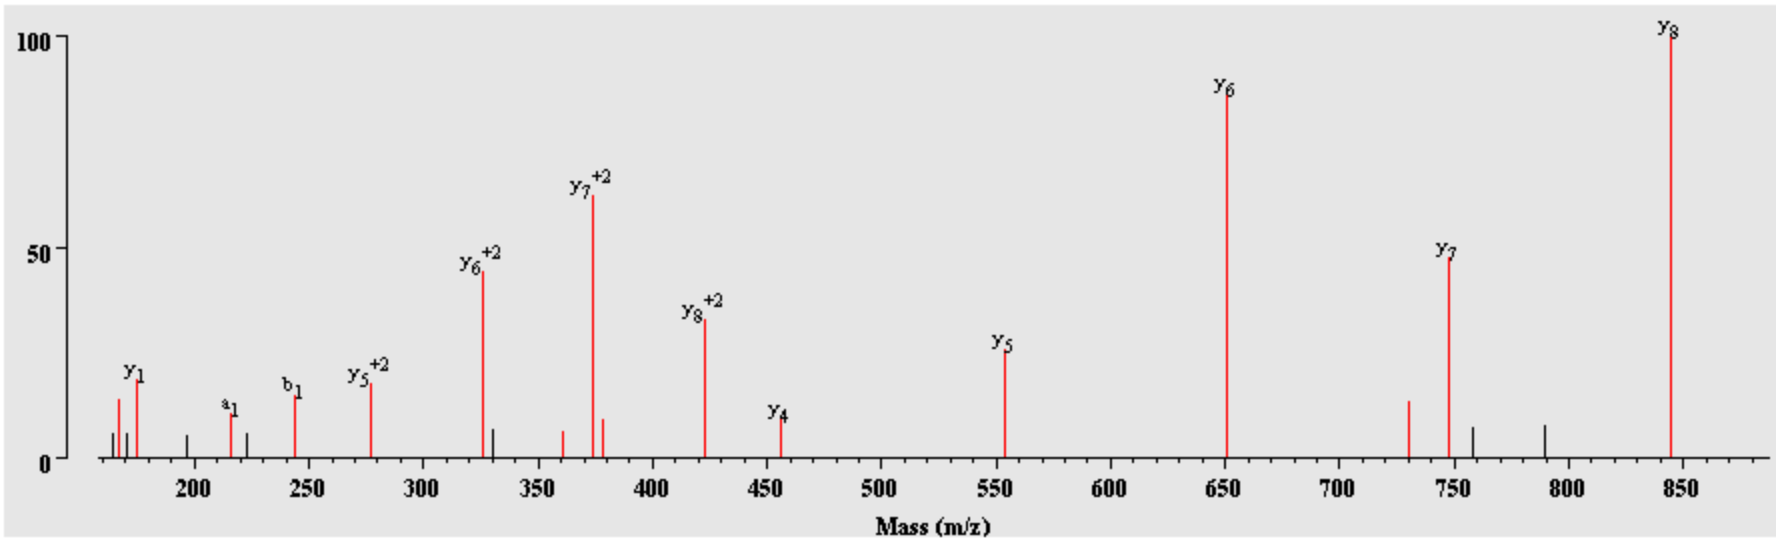

# HIAEDADRK(iTRAQ4plex)YEEVAR<sup>4+</sup>/(523.5384<sup>4+</sup>/ 2091.1314)/A2RRI1

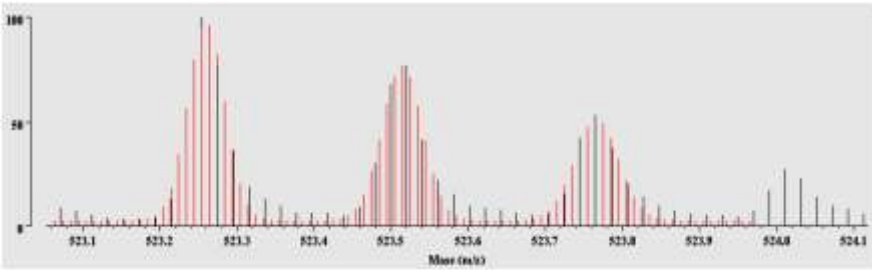

| b        | b+2      | iTRAQ4plex      | y           | y+2      |
|----------|----------|-----------------|-------------|----------|
| 282.1683 | 141.5878 | 1 H             | 15 ---      | ---      |
| 395.2523 | 198.1298 | 2 I             | 14 1808.926 | 904.9666 |
| 466.2894 | 233.6484 | 3 A             | 13 1695.842 | 848.4246 |
| 595.332  | 298.1696 | 4 E             | 12 1624.805 | 812.906  |
| 710.359  | 355.6831 | 5 D             | 11 1495.762 | 748.3847 |
| 781.3961 | 391.2017 | 6 A             | 10 1380.735 | 690.8712 |
| 896.423  | 448.7151 | 7 D             | 9 1309.698  | 655.3527 |
| 1052.524 | 526.7657 | 8 R             | 8 1194.671  | 597.8392 |
| 1324.721 | 662.8642 | 9 K(iTRAQ4plex) | 7 1038.57   | 519.7886 |
| 1487.785 | 744.3959 | 10 Y            | 6 766.373   | 383.6901 |
| 1616.827 | 808.9172 | 11 E            | 5 603.3097  | 302.1585 |
| 1745.87  | 873.4385 | 12 E            | 4 474.2671  | 237.6372 |
| 1844.938 | 922.9727 | 13 V            | 3 345.2245  | 173.1159 |
| 1915.975 | 958.4912 | 14 A            | 2 246.1561  | 123.5817 |
| ---      | ---      | 15 R            | 1 175.119   | 88.0631  |

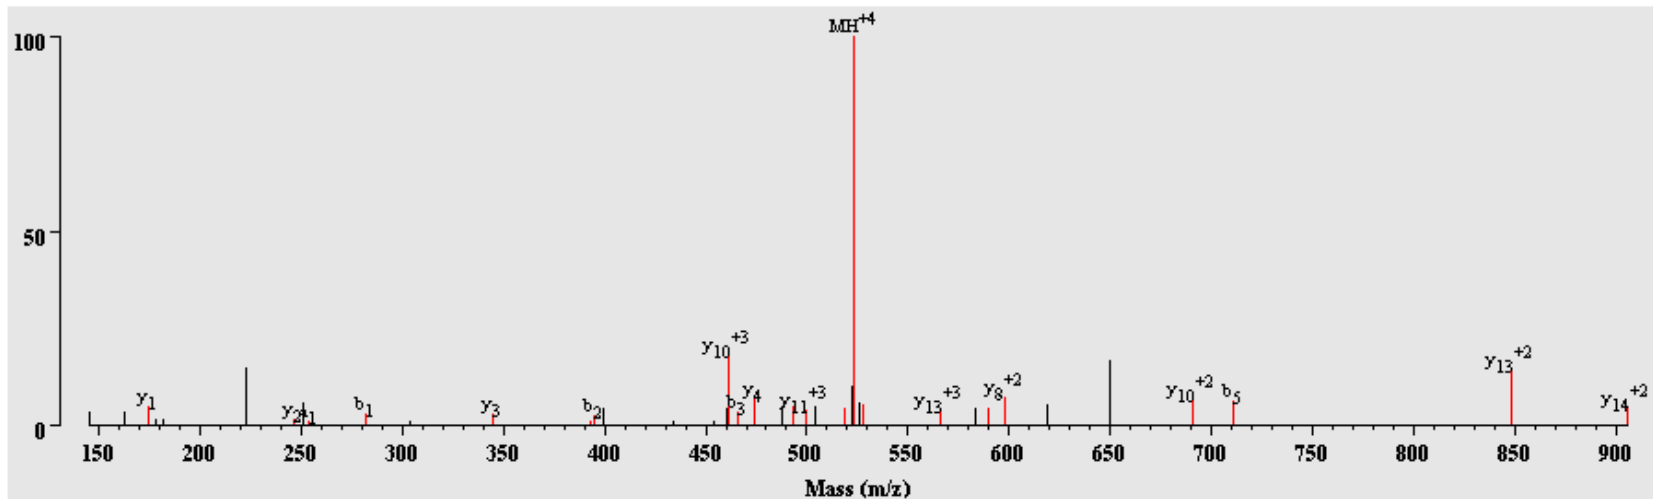

# VVFIFGPDK(iTRAQ4plex)K(iTRAQ4plex)<sup>+3</sup>/(528.21+3/1582.61) /O08709

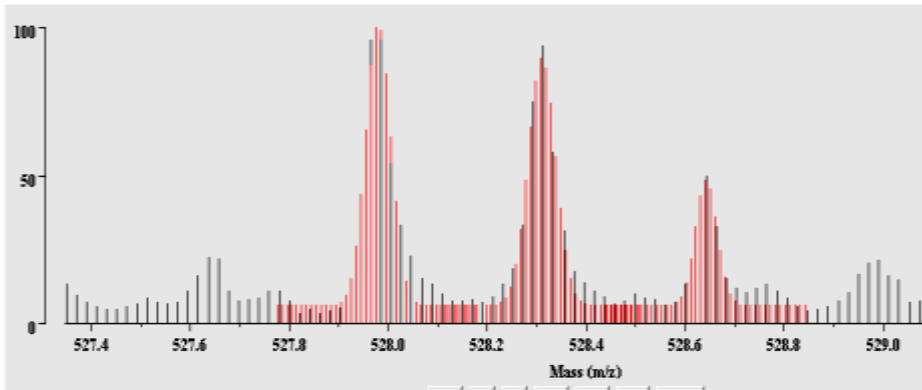

| b        | b+2      | iTRAQ4plex       | y  | y+2               |
|----------|----------|------------------|----|-------------------|
| 244.1778 | ---      | 1 V              | 10 | ---               |
| 343.2462 | ---      | 2 V              | 9  | 1338.802 669.9048 |
| 490.3146 | ---      | 3 F              | 8  | 1239.734 620.3706 |
| 603.3986 | ---      | 4 I              | 7  | 1092.666 546.8364 |
| 750.4671 | ---      | 5 F              | 6  | 979.5815 490.2944 |
| 807.4885 | ---      | 6 G              | 5  | 832.5131 416.7602 |
| 904.5413 | ---      | 7 P              | 4  | 775.4916 388.2494 |
| 1019.568 | ---      | 8 D              | 3  | 678.4388 339.7231 |
| 1291.765 | 646.3863 | 9 K(iTRAQ4plex)  | 2  | 563.4119 282.2096 |
| ---      | ---      | 10 K(iTRAQ4plex) | 1  | 291.2149 146.1111 |

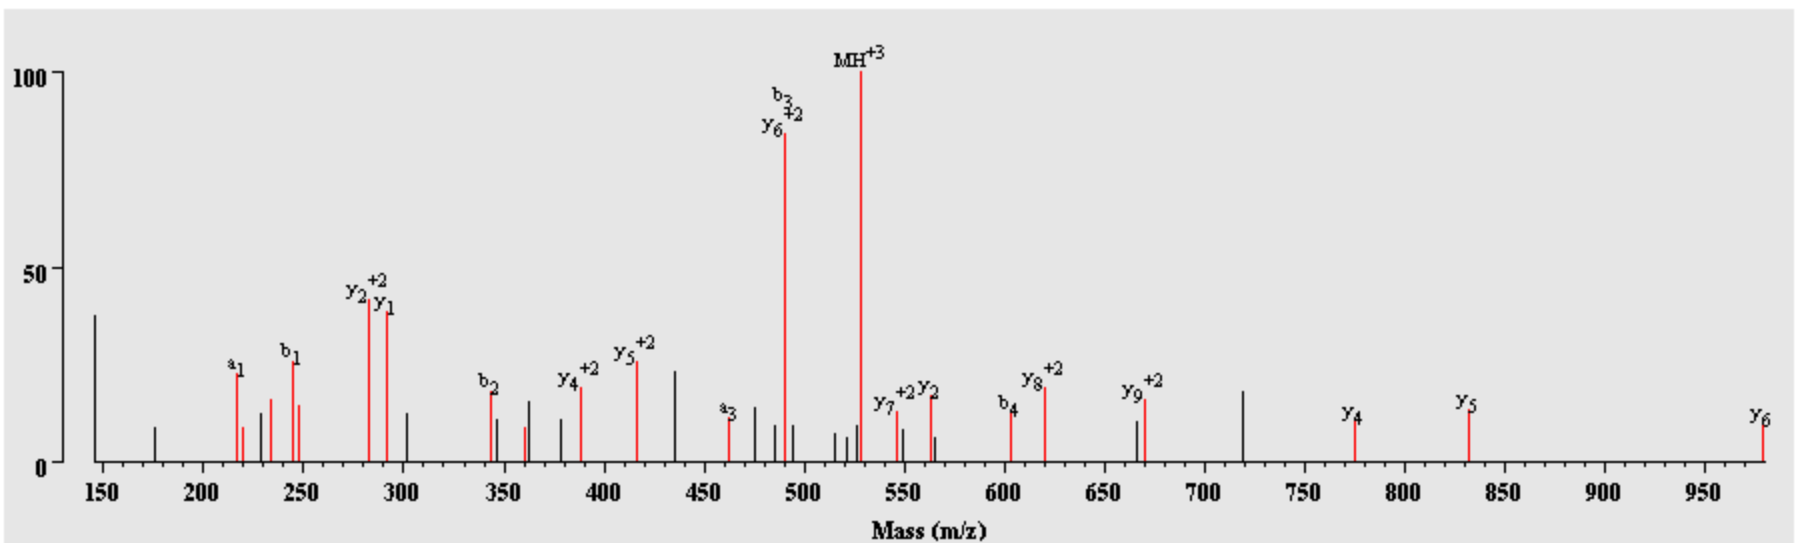



# YGFIEGHVVIPR<sup>+3</sup>/(511.2686<sup>+3</sup>/1531.79)/O08779

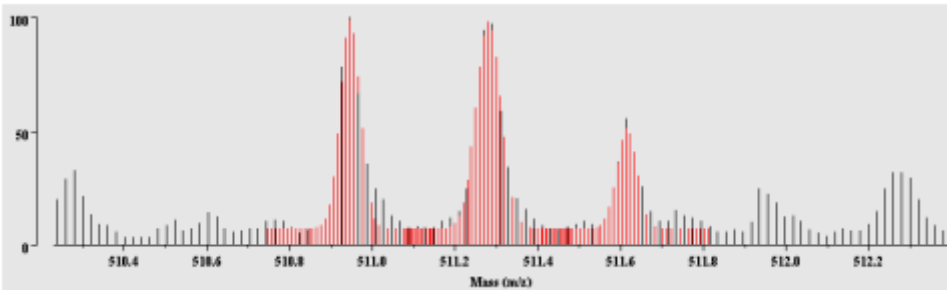

| b        | b+2      | iTRAQ4plex | y  | y+2               |
|----------|----------|------------|----|-------------------|
| 308.1727 | ---      | 1 Y        | 12 | ---               |
| 365.1941 | ---      | 2 G        | 11 | 1223.69 612.3484  |
| 512.2625 | ---      | 3 F        | 10 | 1166.668 583.8377 |
| 625.3466 | ---      | 4 I        | 9  | 1019.6 510.3035   |
| 754.3892 | ---      | 5 E        | 8  | 906.5156 453.7614 |
| 811.4107 | ---      | 6 G        | 7  | 777.473 389.2401  |
| 948.4696 | 474.7384 | 7 H        | 6  | 720.4515 360.7294 |
| 1047.538 | 524.2726 | 8 V        | 5  | 583.3926 292.1999 |
| 1146.606 | 573.8068 | 9 V        | 4  | 484.3242 242.6657 |
| 1259.691 | 630.3489 | 10 I       | 3  | 385.2558 193.1315 |
| 1356.743 | 678.8753 | 11 P       | 2  | 272.1717 136.5895 |
| ---      | ---      | 12 R       | 1  | 175.119 88.0631   |

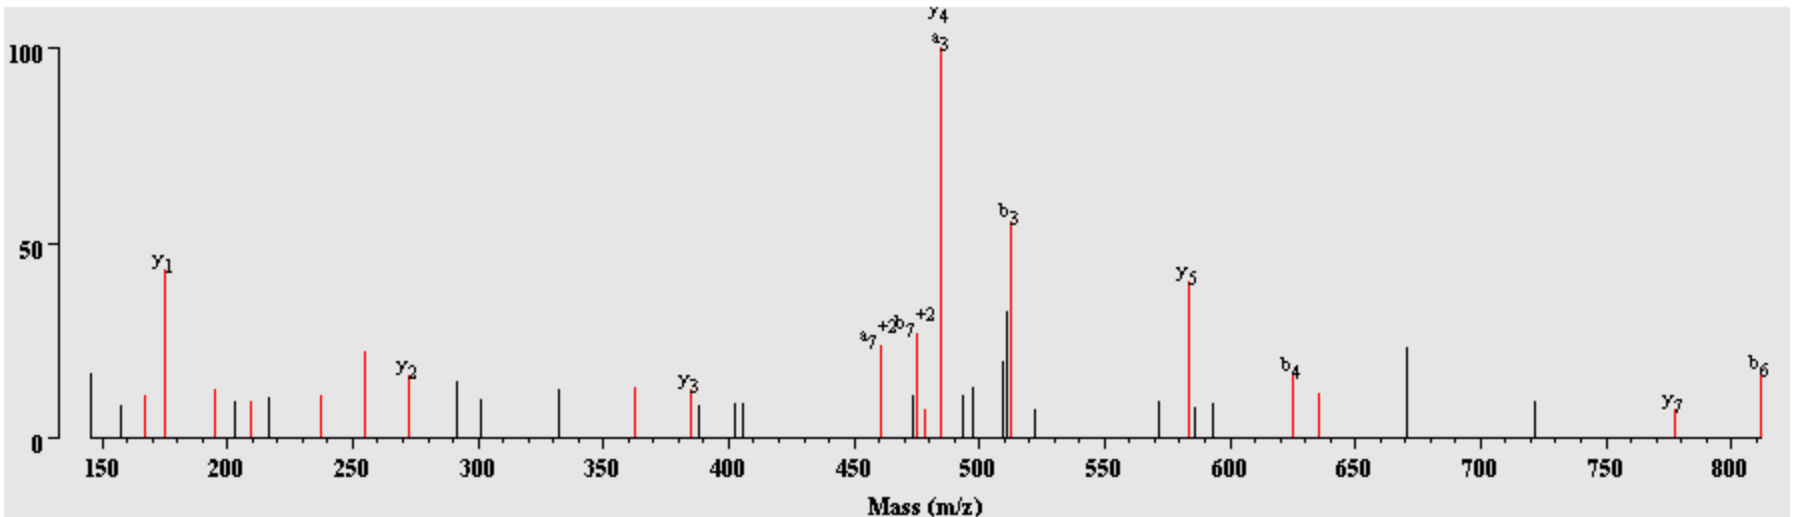

# TSESPARGPSGR<sup>3</sup>/(510.8814<sup>3</sup>/1530.6295)/O35108

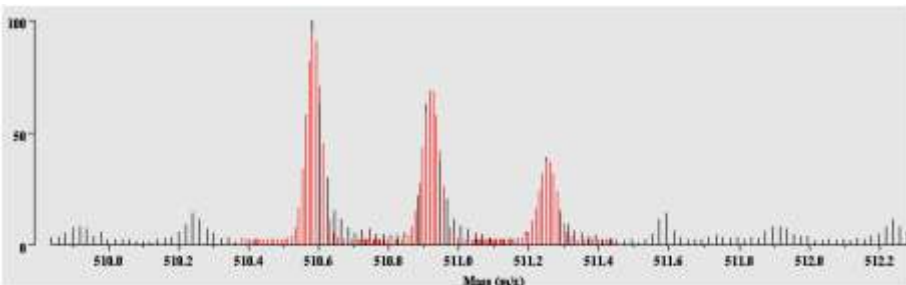

| b               | b+2             | iTRAQ4plex | y  | y+2                      |
|-----------------|-----------------|------------|----|--------------------------|
| 246.157         | ---             | 1 T        | 14 | ---                      |
| 333.189         | ---             | 2 S        | 13 | 1284.629 <b>642.8182</b> |
| <b>462.2316</b> | ---             | 3 E        | 12 | 1197.597 599.3022        |
| <b>549.2637</b> | ---             | 4 S        | 11 | 1068.555 <b>534.7809</b> |
| 646.3164        | ---             | 5 P        | 10 | 981.5225 <b>491.2649</b> |
| 717.3535        | ---             | 6 A        | 9  | 884.4697 442.7385        |
| 873.4547        | <b>437.231</b>  | 7 R        | 8  | 813.4326 407.2199        |
| 930.4761        | 465.7417        | 8 G        | 7  | <b>657.3315</b> 329.1694 |
| 1027.529        | 514.2681        | 9 P        | 6  | <b>600.31</b> 300.6586   |
| 1114.561        | 557.7841        | 10 S       | 5  | <b>503.2572</b> 252.1323 |
| 1171.582        | 586.2948        | 11 G       | 4  | 416.2252 208.6162        |
| 1258.614        | <b>629.8108</b> | 12 S       | 3  | <b>359.2037</b> 180.1055 |
| 1355.667        | 678.3372        | 13 P       | 2  | <b>272.1717</b> 136.5895 |
| ---             | ---             | 14 R       | 1  | <b>175.119</b> 88.0631   |

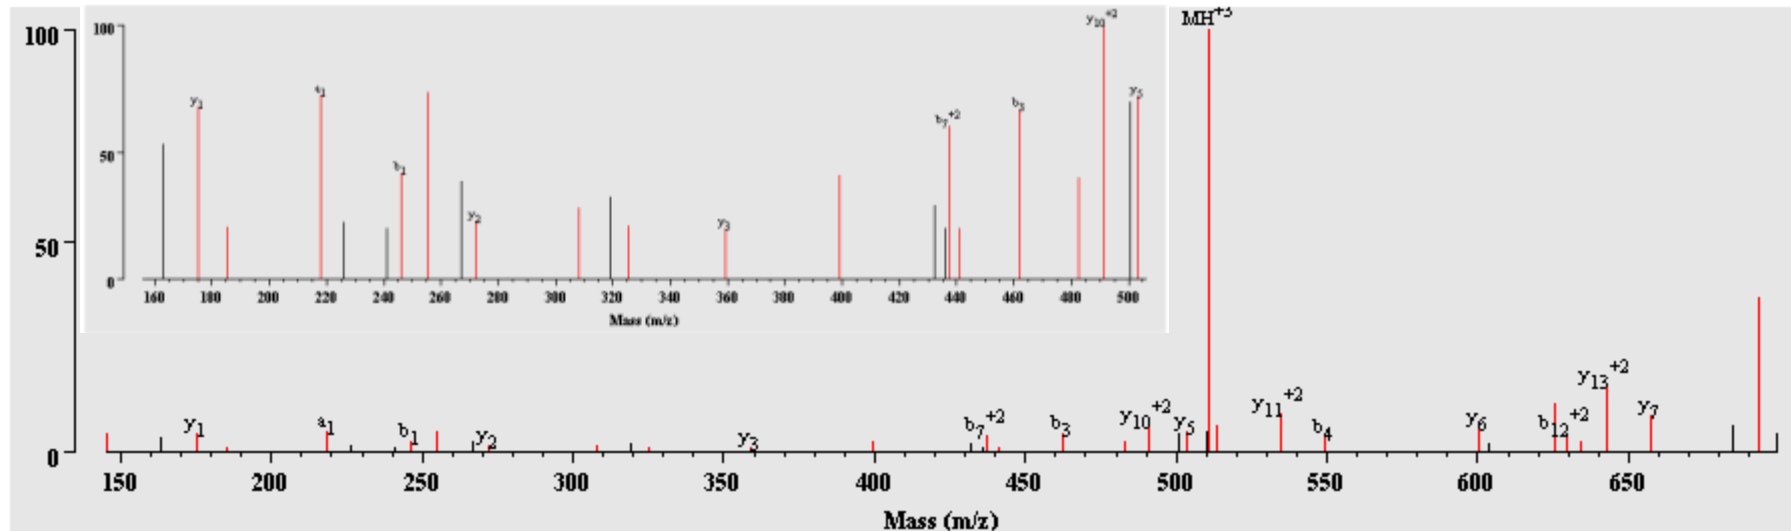

# DFFLANASR<sup>+2</sup>/(593.1611<sup>+2</sup>/1185.3148)/O35350

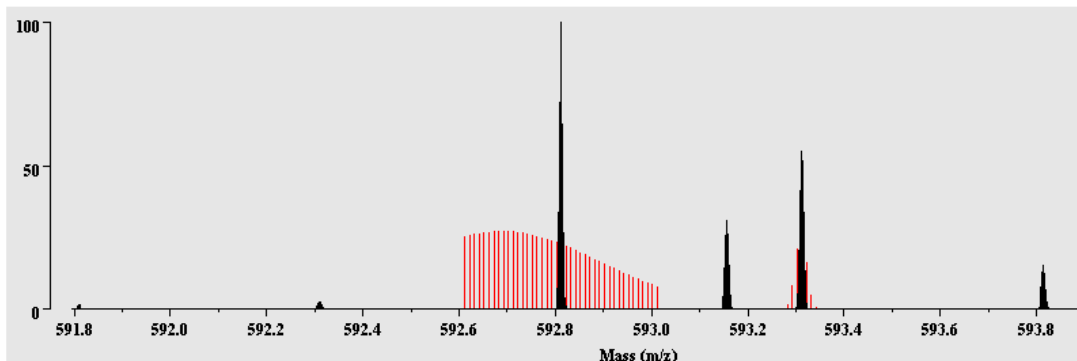

| b        | iTRAQ4plex | y          | y+2      |
|----------|------------|------------|----------|
| 260.1363 | 1 D        | 9 ---      | ---      |
| 407.2047 | 2 F        | 8 925.489  | 463.2482 |
| 554.2731 | 3 F        | 7 778.4206 | 389.7139 |
| 667.3572 | 4 L        | 6 631.3522 | 316.1797 |
| 738.3943 | 5 A        | 5 518.2681 | 259.6377 |
| 852.4372 | 6 N        | 4 447.231  | 224.1191 |
| 923.4743 | 7 A        | 3 333.1881 | 167.0977 |
| 1010.506 | 8 S        | 2 262.151  | 131.5791 |
| ---      | 9 R        | 1 175.119  | 88.0631  |

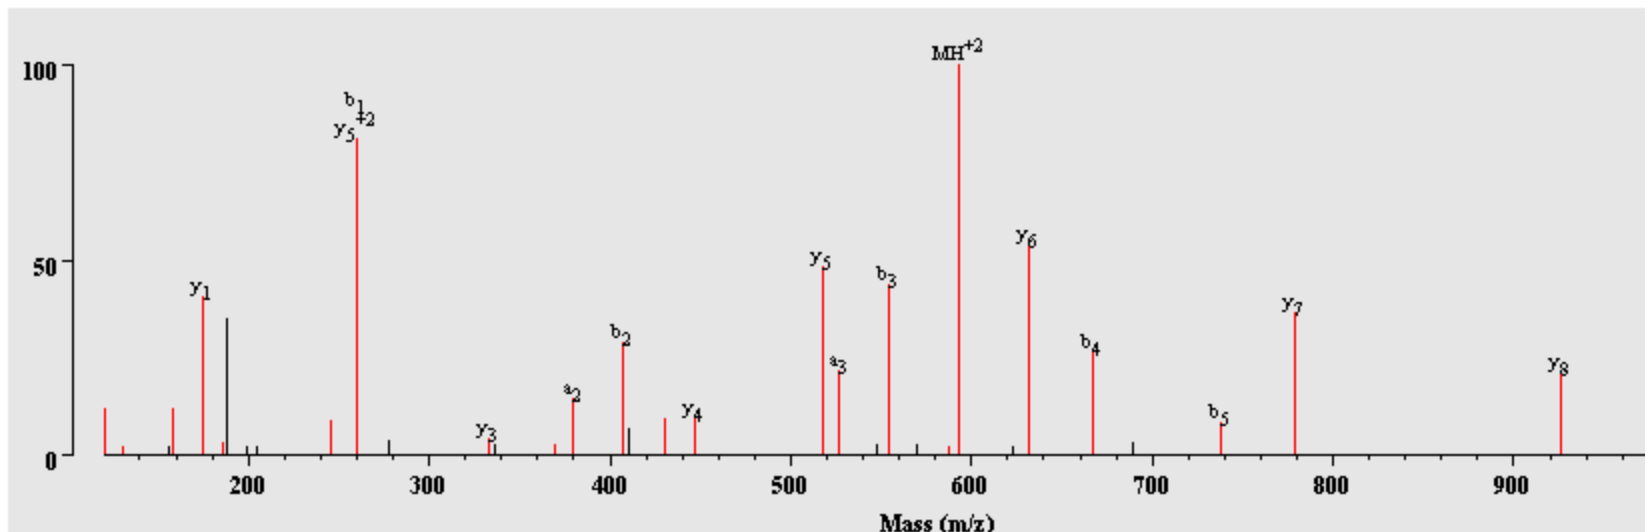

# ETVFTK(iTRAQ4plex)SPYQEFTDHLVK(iTRAQ4plex)<sup>+4</sup>/(651.416<sup>+4</sup> /2602.6419)/O55211

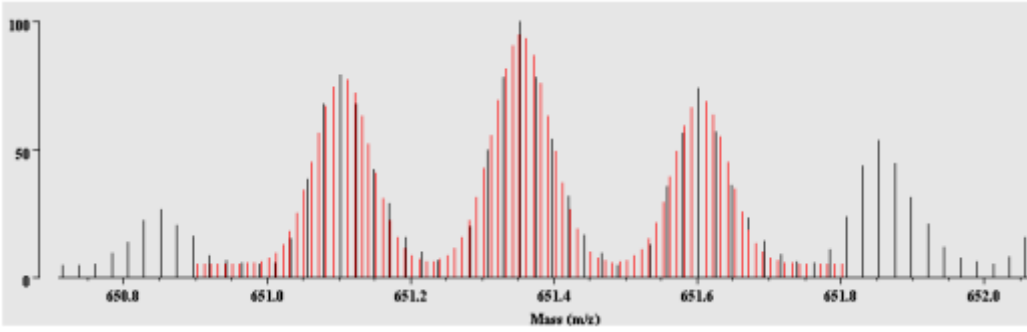

| b        | b+2      | iTRAQ4plex       | y  | y+2               |
|----------|----------|------------------|----|-------------------|
| 274.1519 | ---      | 1 E              | 18 | ---               |
| 375.1996 | ---      | 2 T              | 17 | 2328.248 1164.628 |
| 474.268  | ---      | 3 V              | 16 | 2227.2 1114.104   |
| 621.3364 | ---      | 4 F              | 15 | 2128.132 1064.57  |
| 722.3841 | ---      | 5 T              | 14 | 1981.063 991.0353 |
| 994.5811 | 497.7942 | 6 K(iTRAQ4plex)  | 13 | 1880.016 940.5114 |
| 1081.613 | 541.3102 | 7 S              | 12 | 1607.819 804.4129 |
| 1178.666 | 589.8366 | 8 P              | 11 | 1520.787 760.8969 |
| 1341.729 | 671.3683 | 9 Y              | 10 | 1423.734 712.3705 |
| 1469.788 | 735.3976 | 10 Q             | 9  | 1260.671 630.8389 |
| 1598.83  | 799.9189 | 11 E             | 8  | 1132.612 566.8096 |
| 1745.899 | 873.4531 | 12 F             | 7  | 1003.569 502.2883 |
| 1846.947 | 923.9769 | 13 T             | 6  | 856.5009 428.7541 |
| 1961.974 | 981.4904 | 14 D             | 5  | 755.4532 378.2302 |
| 2099.032 | 1050.02  | 15 H             | 4  | 640.4263 320.7168 |
| 2212.116 | 1106.562 | 16 L             | 3  | 503.3673 252.1873 |
| 2311.185 | 1156.096 | 17 V             | 2  | 390.2833 195.6453 |
| ---      | ---      | 18 K(iTRAQ4plex) | 1  | 291.2149 146.1111 |

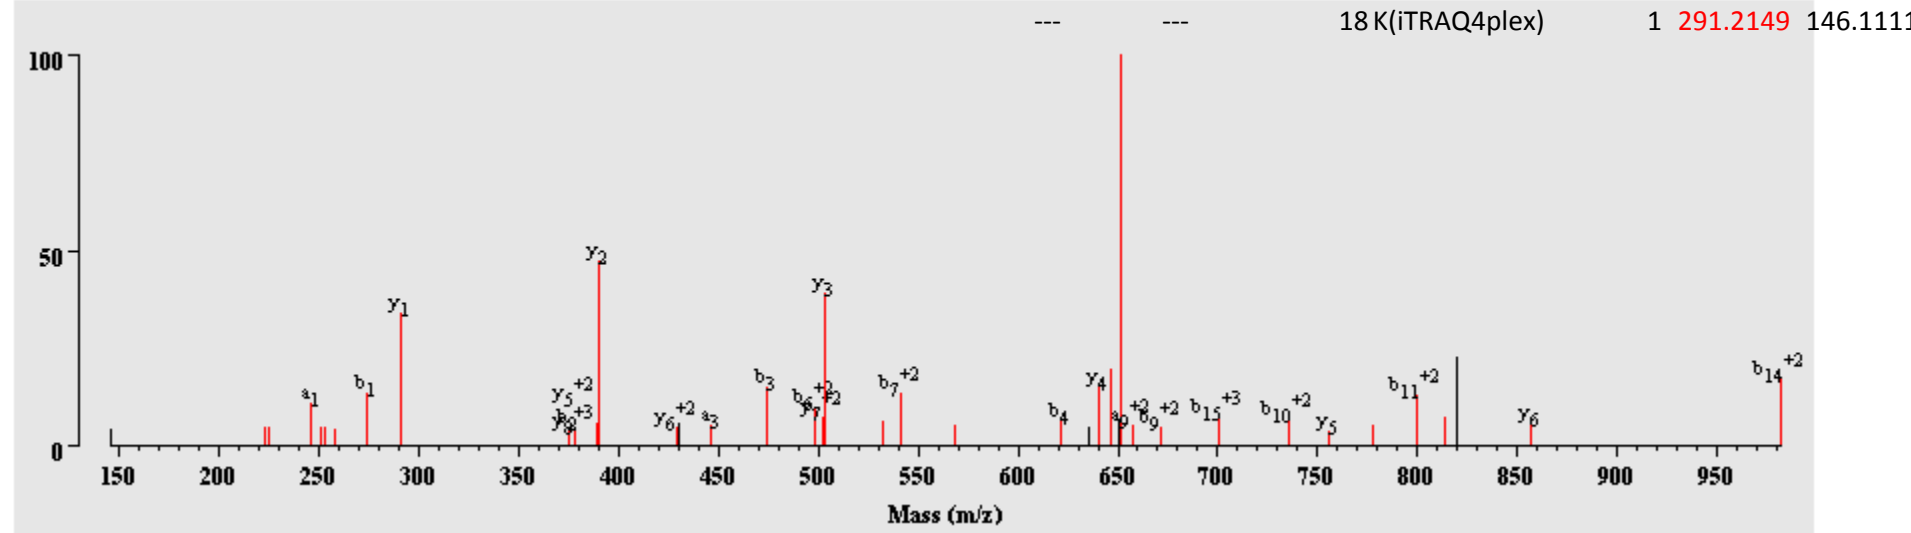

# SAPLPNDSQAR<sup>+2</sup>/(650.7059<sup>+2</sup>/1300.4043)/O70172

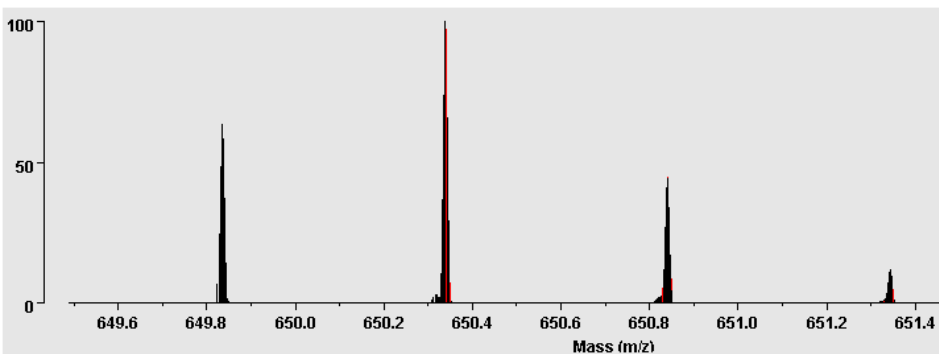

| b        | iTRAQ4plex | y           | y+2      |
|----------|------------|-------------|----------|
| 232.1414 | 1S         | 11 ---      | ---      |
| 303.1785 | 2A         | 10 1068.543 | 534.7753 |
| 400.2312 | 3P         | 9 997.5061  | 499.2567 |
| 513.3153 | 4L         | 8 900.4534  | 450.7303 |
| 610.3681 | 5P         | 7 787.3693  | 394.1883 |
| 724.411  | 6N         | 6 690.3165  | 345.6619 |
| 839.4379 | 7D         | 5 576.2736  | 288.6404 |
| 926.47   | 8S         | 4 461.2467  | 231.127  |
| 1054.529 | 9Q         | 3 374.2146  | 187.611  |
| 1125.566 | 10A        | 2 246.1561  | 123.5817 |
| ---      | 11R        | 1 175.119   | 88.0631  |

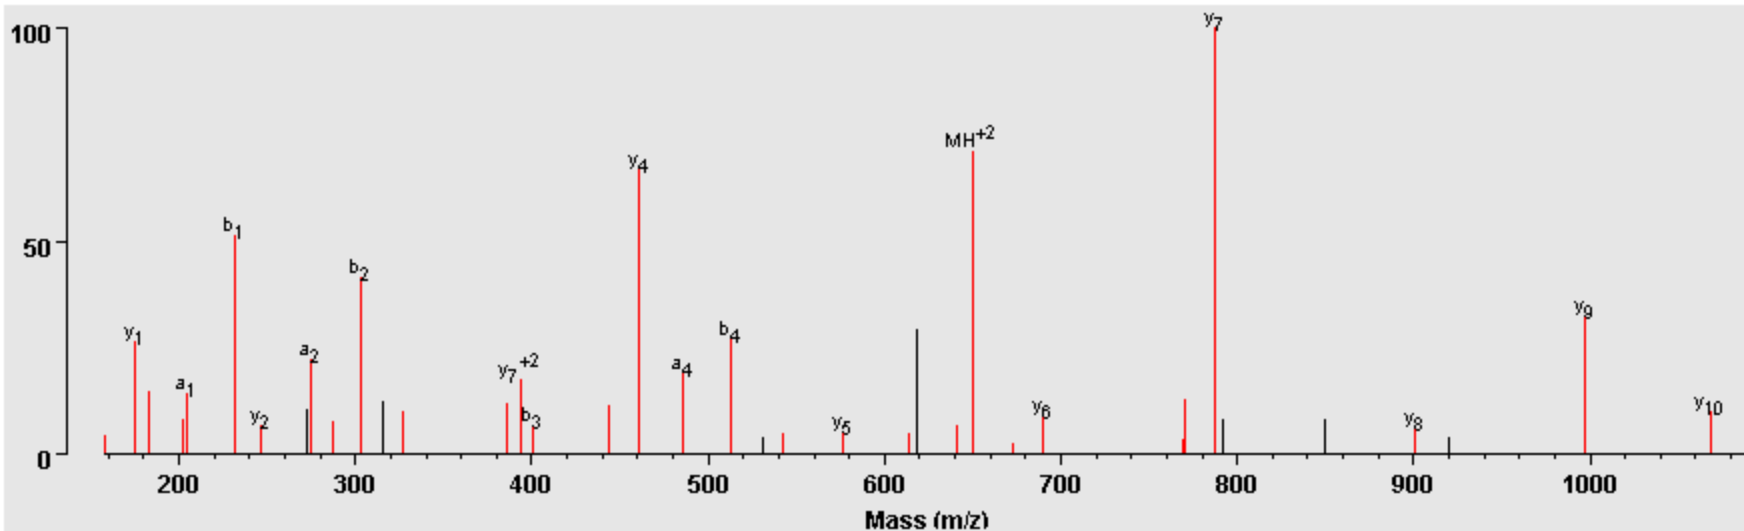

# SLADIAREEASNFR<sup>+3</sup>/(575.2971<sup>+3</sup>/1723.8765)/O70435

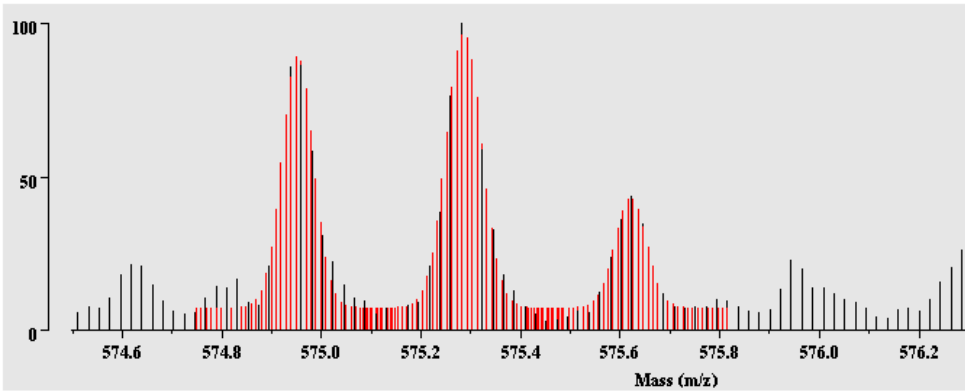

| b        | b+2      | iTRAQ4plex | y  | y+2               |
|----------|----------|------------|----|-------------------|
| 232.1414 | ---      | 1 S        | 14 | ---               |
| 345.2254 | ---      | 2 L        | 13 | 1491.755 746.3812 |
| 416.2625 | ---      | 3 A        | 12 | 1378.671 689.8391 |
| 531.2895 | ---      | 4 D        | 11 | 1307.634 654.3206 |
| 644.3736 | ---      | 5 I        | 10 | 1192.607 596.8071 |
| 715.4107 | ---      | 6 A        | 9  | 1079.523 540.2651 |
| 871.5118 | 436.2595 | 7 R        | 8  | 1008.486 504.7465 |
| 1000.554 | 500.7808 | 8 E        | 7  | 852.3846 426.6959 |
| 1129.597 | 565.3021 | 9 E        | 6  | 723.342 362.1747  |
| 1200.634 | 600.8207 | 10 A       | 5  | 594.2994 297.6534 |
| 1287.666 | 644.3367 | 11 S       | 4  | 523.2623 262.1348 |
| 1401.709 | 701.3582 | 12 N       | 3  | 436.2303 218.6188 |
| 1548.777 | 774.8924 | 13 F       | 2  | 322.1874 161.5973 |
| ---      | ---      | 14 R       | 1  | 175.119 88.0631   |

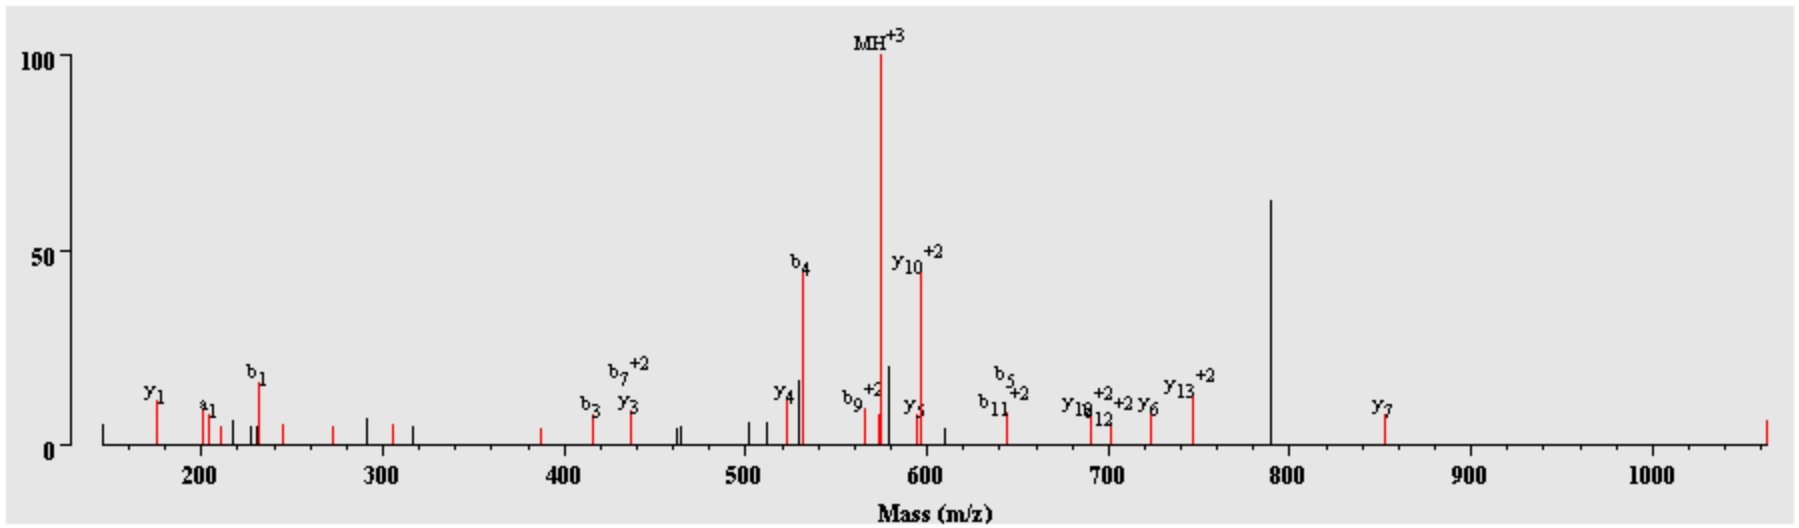

# FLIATGERPR<sup>+3</sup>/(455.137<sup>+3</sup>/1304.5262)/O89049

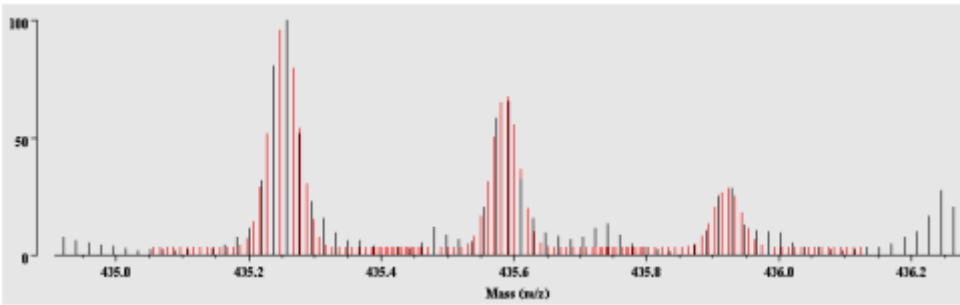

| b        | b+2      | iTRAQ4plex | y  | y+2               |
|----------|----------|------------|----|-------------------|
| 292.1778 | ---      | 1 F        | 10 | ---               |
| 405.2618 | ---      | 2 L        | 9  | 1012.59 506.7985  |
| 518.3459 | ---      | 3 I        | 8  | 899.5057 450.2565 |
| 589.383  | ---      | 4 A        | 7  | 786.4217 393.7145 |
| 690.4307 | ---      | 5 T        | 6  | 715.3846 358.1959 |
| 747.4521 | ---      | 6 G        | 5  | 614.3369 307.6721 |
| 876.4947 | ---      | 7 E        | 4  | 557.3154 279.1613 |
| 1032.596 | 516.8016 | 8 R        | 3  | 428.2728 214.6401 |
| 1129.649 | 565.3279 | 9 P        | 2  | 272.1717 136.5895 |
| ---      | ---      | 10 R       | 1  | 175.119 88.0631   |

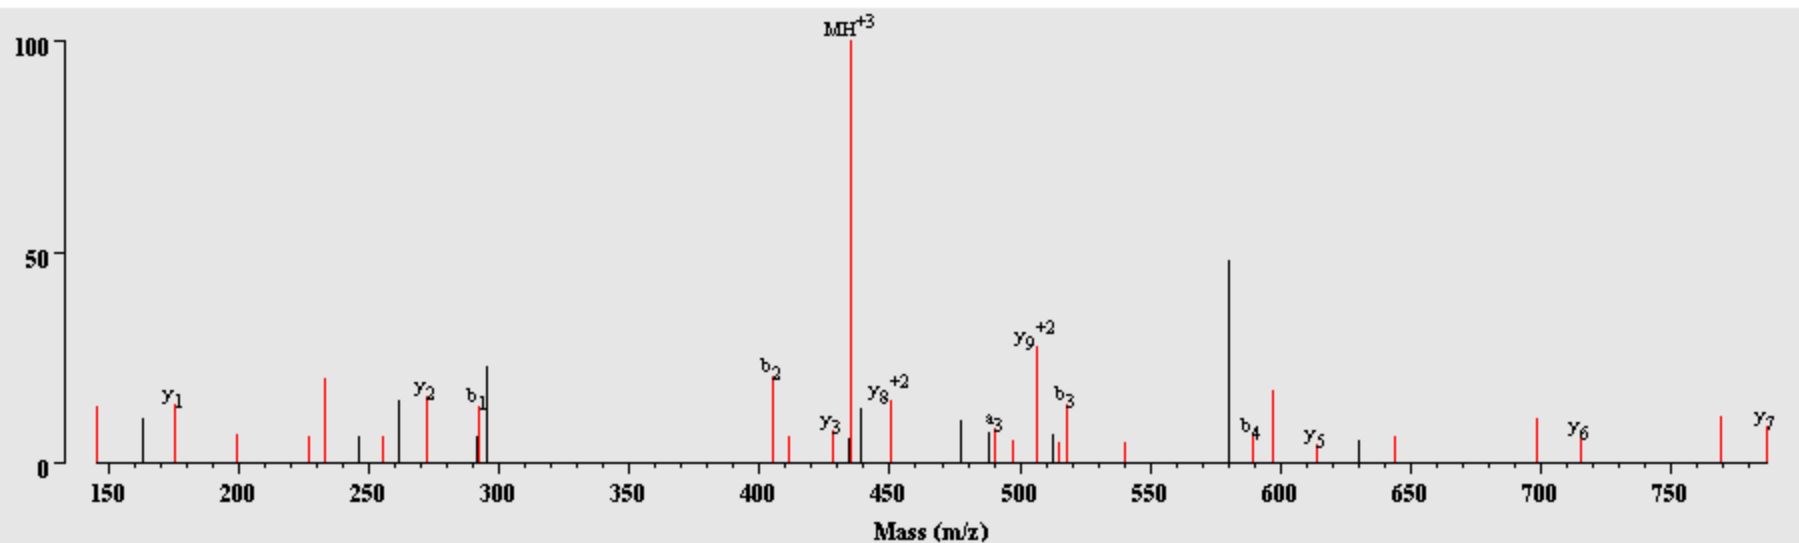

# VLTEDELGHPEK(iTRAQ4plex)GDAITR<sup>+4</sup>/(568.0959<sup>+4</sup>/2269.361) /P05369

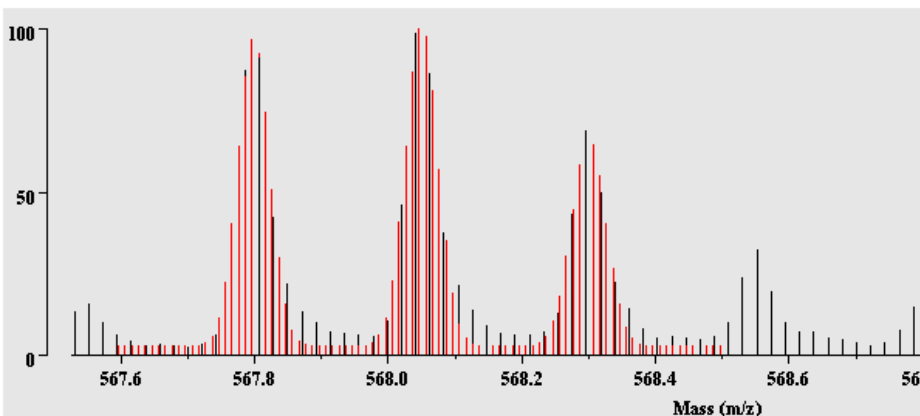

| b        | b+2      | iTRAQ4plex       | y  | y+2               |
|----------|----------|------------------|----|-------------------|
| 244.1778 | ---      | 1V               | 18 | ---               |
| 357.2618 | ---      | 2L               | 17 | 2025.037 1013.022 |
| 458.3095 | ---      | 3T               | 16 | 1911.953 956.4801 |
| 587.3521 | ---      | 4E               | 15 | 1810.905 905.9562 |
| 702.379  | ---      | 5D               | 14 | 1681.863 841.4349 |
| 831.4216 | ---      | 6E               | 13 | 1566.836 783.9215 |
| 944.5057 | ---      | 7L               | 12 | 1437.793 719.4002 |
| 1001.527 | ---      | 8G               | 11 | 1324.709 662.8581 |
| 1138.586 | 569.7967 | 9H               | 10 | 1267.688 634.3474 |
| 1235.639 | 618.3231 | 10P              | 9  | 1130.629 565.8179 |
| 1364.681 | 682.8443 | 11E              | 8  | 1033.576 517.2916 |
| 1636.878 | 818.9429 | 12 K(iTRAQ4plex) | 7  | 904.5332 452.7703 |
| 1693.9   | 847.4536 | 13 G             | 6  | 632.3362 316.6717 |
| 1808.927 | 904.9671 | 14 D             | 5  | 575.3148 288.161  |
| 1879.964 | 940.4856 | 15 A             | 4  | 460.2878 230.6475 |
| 1993.048 | 997.0277 | 16 I             | 3  | 389.2507 195.129  |
| 2094.096 | 1047.552 | 17 T             | 2  | 276.1666 138.587  |
| ---      | ---      | 18 R             | 1  | 175.119 88.0631   |

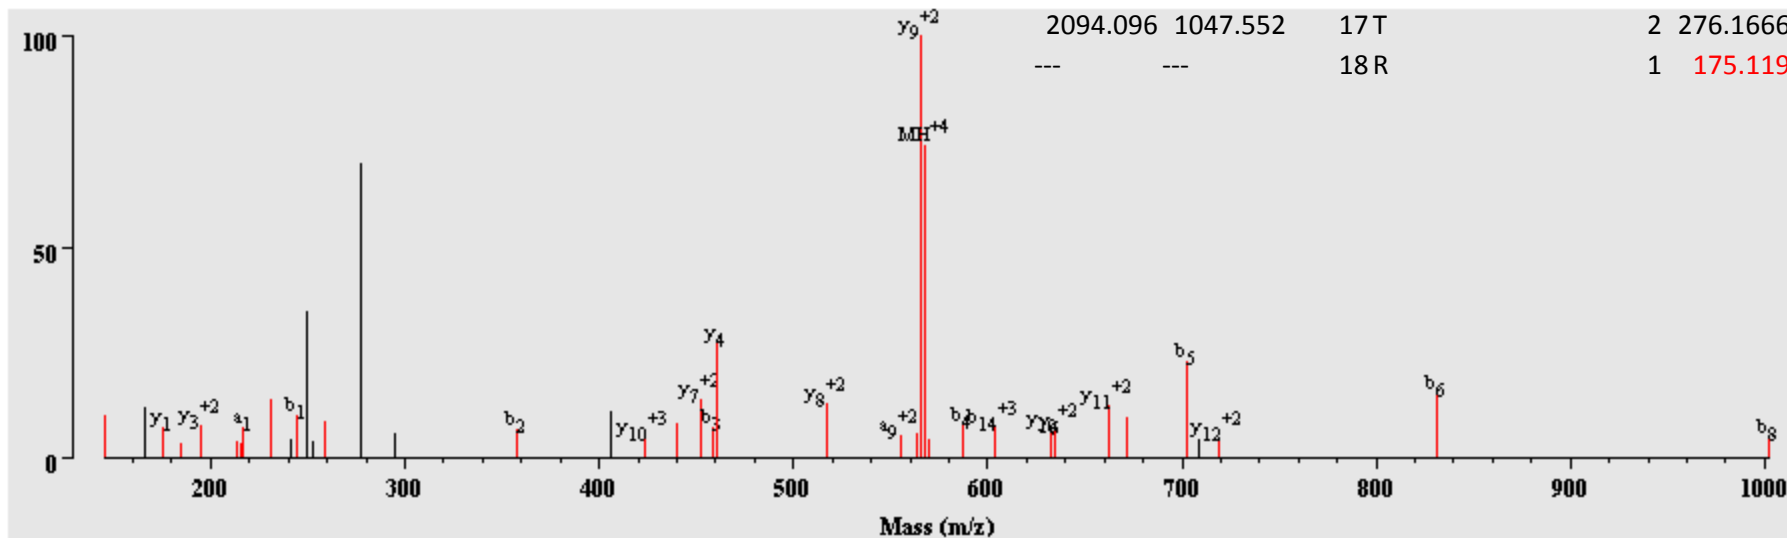



# NLYGTQSLELPFQGAHR<sup>+3</sup>/(692.7769<sup>+3</sup>/2076.3157)/P07722

| b        | b+2      | iTRAQ4plex | y  | y+2               |
|----------|----------|------------|----|-------------------|
| 259.1523 | ---      | 1 N        | 17 | ---               |
| 372.2363 | ---      | 2 L        | 16 | 1816.934 908.9707 |
| 535.2997 | ---      | 3 Y        | 15 | 1703.85 852.4286  |
| 592.3211 | ---      | 4 G        | 14 | 1540.787 770.897  |
| 693.3688 | ---      | 5 T        | 13 | 1483.765 742.3862 |
| 821.4274 | ---      | 6 Q        | 12 | 1382.718 691.8624 |
| 908.4594 | ---      | 7 S        | 11 | 1254.659 627.8331 |
| 1021.544 | ---      | 8 L        | 10 | 1167.627 584.3171 |
| 1150.586 | ---      | 9 E        | 9  | 1054.543 527.7751 |
| 1263.67  | ---      | 10 L       | 8  | 925.5003 463.2538 |
| 1360.723 | ---      | 11 P       | 7  | 812.4162 406.7117 |
| 1507.791 | ---      | 12 F       | 6  | 715.3634 358.1854 |
| 1635.85  | ---      | 13 Q       | 5  | 568.295 284.6511  |
| 1692.871 | ---      | 14 G       | 4  | 440.2364 220.6219 |
| 1763.909 | ---      | 15 A       | 3  | 383.215 192.1111  |
| 1900.967 | 950.9873 | 16 H       | 2  | 312.1779 156.5926 |
| ---      | ---      | 17 R       | 1  | 175.119 88.0631   |

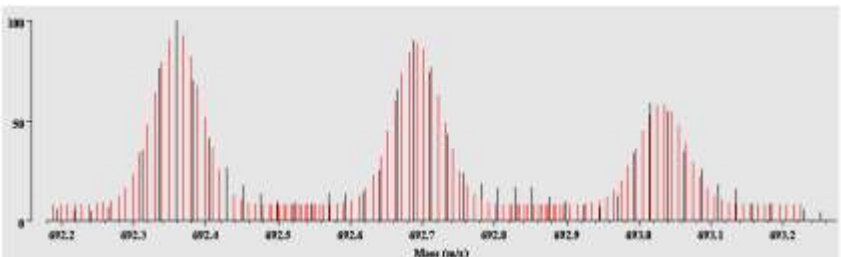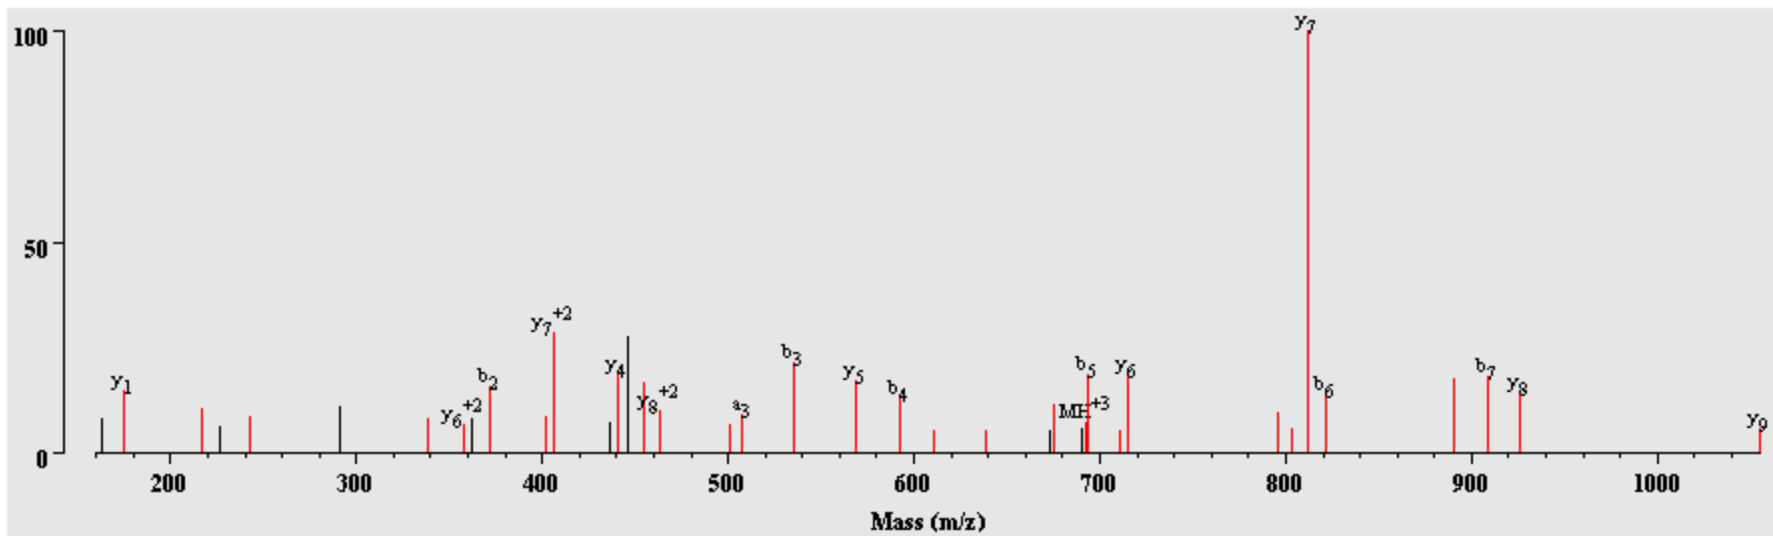

# IIAEGANGPTTPEADK(iTRAQ4)IFLER<sup>+4</sup>/(633.6845<sup>+4</sup>/2531.7156)

/P10860<sup>b</sup>

b+2

y

y+2

iTRAQ4plex

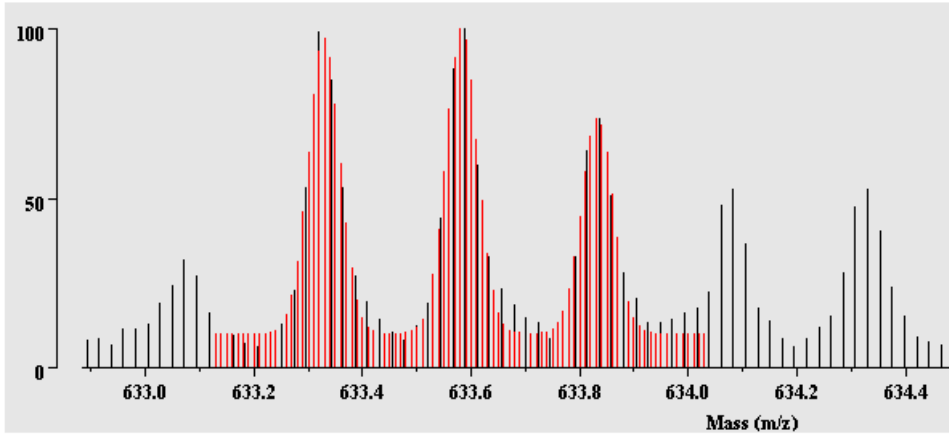

|          |          |                  |    |          |          |
|----------|----------|------------------|----|----------|----------|
| 258.1934 | ---      | 1 I              | 21 | ---      | ---      |
| 371.2775 | ---      | 2 I              | 20 | 2273.189 | 1137.098 |
| 442.3146 | ---      | 3 A              | 19 | 2160.105 | 1080.556 |
| 571.3572 | ---      | 4 E              | 18 | 2089.068 | 1045.038 |
| 628.3786 | ---      | 5 G              | 17 | 1960.026 | 980.5164 |
| 699.4158 | ---      | 6 A              | 16 | 1903.004 | 952.0057 |
| 813.4587 | ---      | 7 N              | 15 | 1831.967 | 916.4872 |
| 870.4801 | ---      | 8 G              | 14 | 1717.924 | 859.4657 |
| 967.5329 | ---      | 9 P              | 13 | 1660.903 | 830.955  |
| 1068.581 | ---      | 10 T             | 12 | 1563.85  | 782.4286 |
| 1169.628 | ---      | 11 T             | 11 | 1462.802 | 731.9047 |
| 1266.681 | ---      | 12 P             | 10 | 1361.755 | 681.3809 |
| 1395.724 | ---      | 13 E             | 9  | 1264.702 | 632.8545 |
| 1466.761 | ---      | 14 A             | 8  | 1135.659 | 568.3332 |
| 1581.788 | ---      | 15 D             | 7  | 1064.622 | 532.8147 |
| 1853.985 | 927.496  | 16 K(iTRAQ4plex) | 6  | 949.5951 | 475.3012 |
| 1967.069 | 984.038  | 17 I             | 5  | 677.3981 | 339.2027 |
| 2114.137 | 1057.572 | 18 F             | 4  | 564.314  | 282.6606 |
| 2227.221 | 1114.114 | 19 L             | 3  | 417.2456 | 209.1264 |
| 2356.264 | 1178.636 | 20 E             | 2  | 304.1615 | 152.5844 |
| ---      | ---      | 21 R             | 1  | 175.119  | 88.0631  |

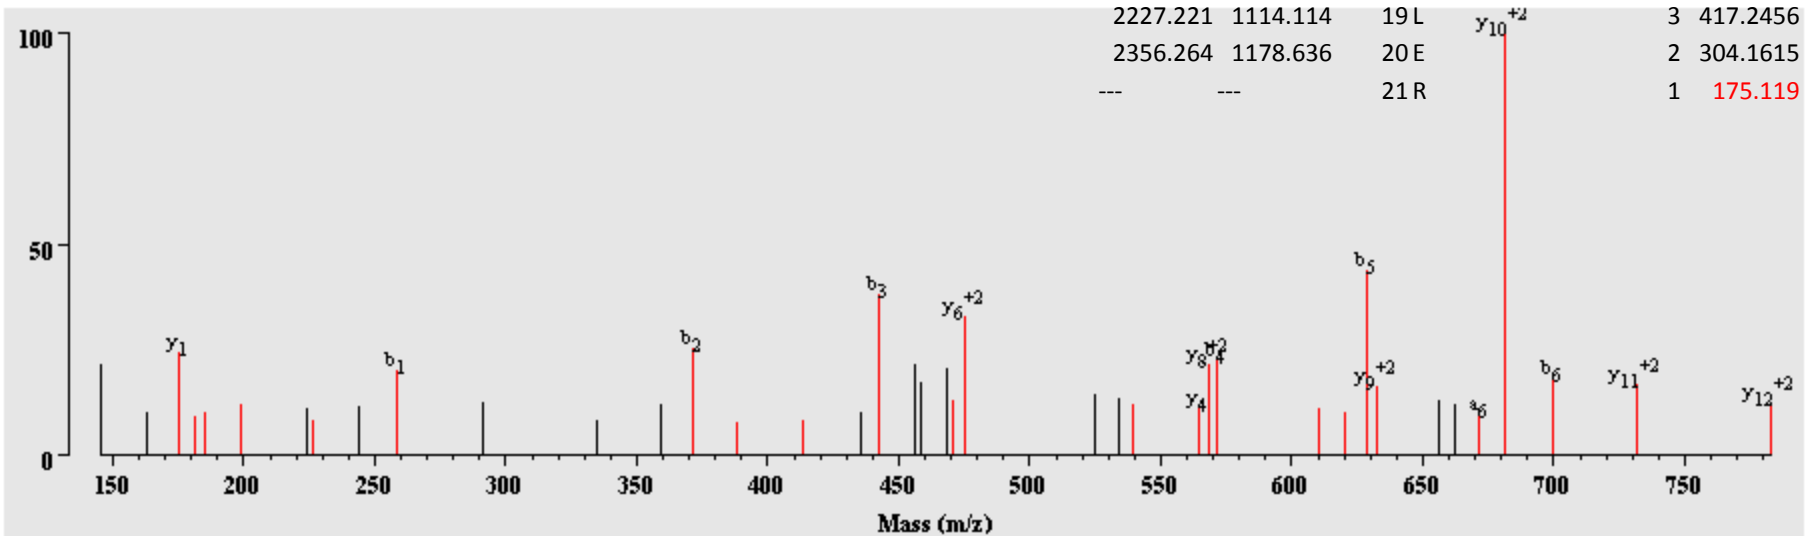

# RVLVYGGRGALGSR<sup>+4</sup>/(402.2248<sup>+4</sup>/1605.877)/P11348

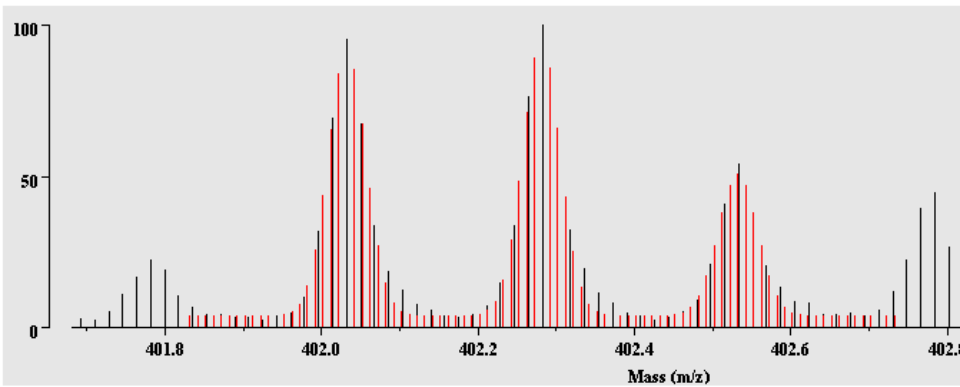

| b        | b+2      | iTRAQ4plex | y           | y+2      |
|----------|----------|------------|-------------|----------|
| 301.2104 | 151.1089 | 1 R        | 14 ---      | ---      |
| 400.2789 | 200.6431 | 2 V        | 13 1304.743 | 652.8753 |
| 513.3629 | 257.1851 | 3 L        | 12 1205.675 | 603.3411 |
| 612.4313 | 306.7193 | 4 V        | 11 1092.591 | 546.7991 |
| 775.4947 | 388.251  | 5 Y        | 10 993.5225 | 497.2649 |
| 832.5161 | 416.7617 | 6 G        | 9 830.4591  | 415.7332 |
| 889.5376 | 445.2724 | 7 G        | 8 773.4377  | 387.2225 |
| 1045.639 | 523.323  | 8 R        | 7 716.4162  | 358.7117 |
| 1102.66  | 551.8337 | 9 G        | 6 560.3151  | 280.6612 |
| 1173.697 | 587.3523 | 10 A       | 5 503.2936  | 252.1504 |
| 1286.781 | 643.8943 | 11 L       | 4 432.2565  | 216.6319 |
| 1343.803 | 672.405  | 12 G       | 3 319.1724  | 160.0899 |
| 1430.835 | 715.9211 | 13 S       | 2 262.151   | 131.5791 |
| ---      | ---      | 14 R       | 1 175.119   | 88.0631  |

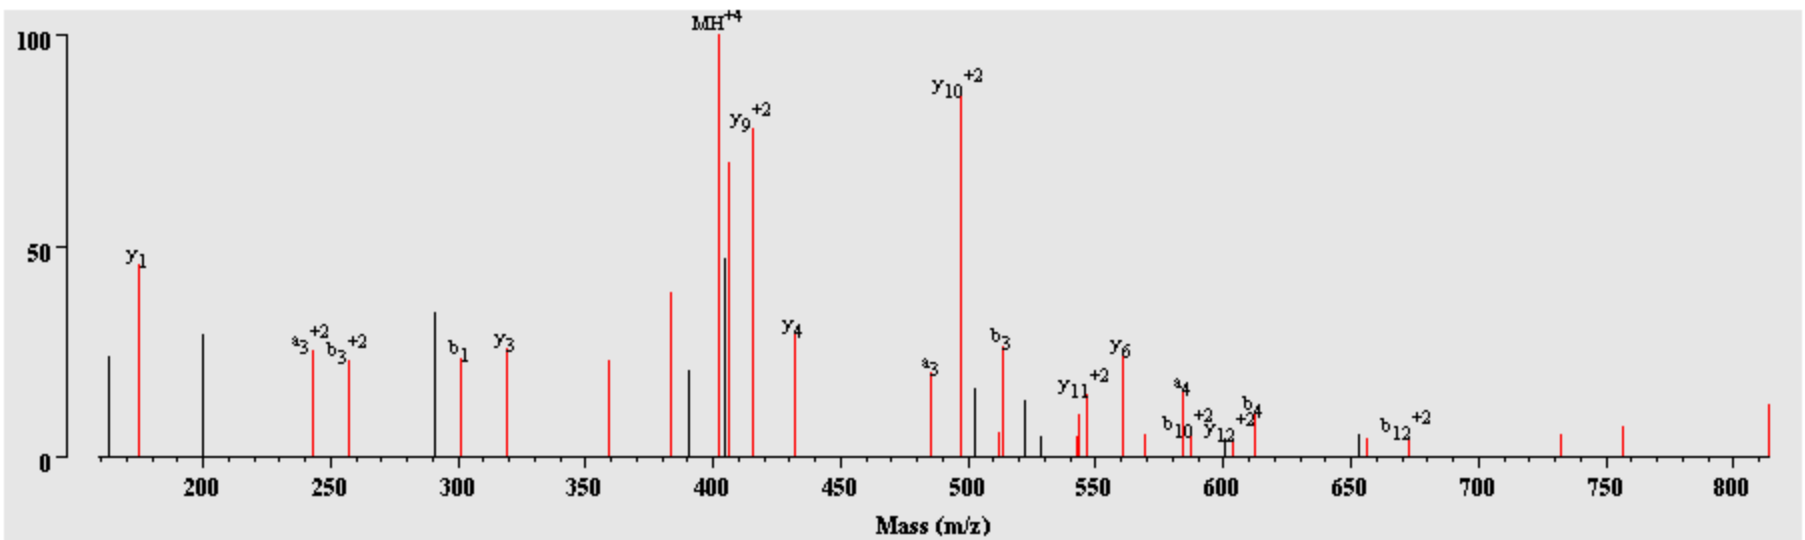

# K(iTRAQ4plex)PPPDGHYVDVVR<sup>+4</sup>/(442.7224<sup>+4</sup>/1767.8672) /P14942

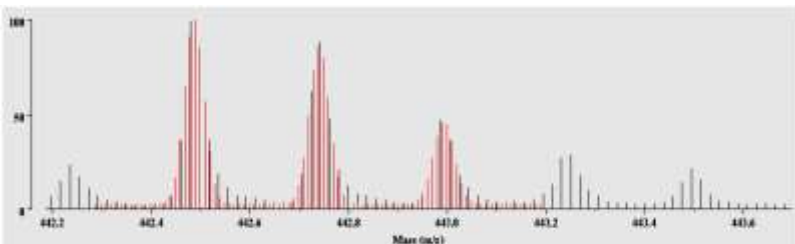

| b               | b+2             | iTRAQ4plex      | y     | y+2                             |
|-----------------|-----------------|-----------------|-------|---------------------------------|
| 417.3064        | 209.1568        | 1 K(iTRAQ4plex) | 13--- | ---                             |
| 514.3591        | 257.6832        | 2 P             | 12    | 1350.68 <b>675.8437</b>         |
| 611.4119        | 306.2096        | 3 P             | 11    | 1253.627 <b>627.3173</b>        |
| 708.4647        | 354.736         | 4 P             | 10    | 1156.575 <b>578.7909</b>        |
| 823.4916        | <b>412.2494</b> | 5 D             | 9     | 1059.522 <b>530.2645</b>        |
| <b>880.5131</b> | <b>440.7602</b> | 6 G             | 8     | <b>944.4948</b> <b>472.7511</b> |
| 1017.572        | <b>509.2896</b> | 7 H             | 7     | <b>887.4734</b> 444.2403        |
| 1180.635        | 590.8213        | 8 Y             | 6     | <b>750.4145</b> 375.7109        |
| 1279.704        | 640.3555        | 9 V             | 5     | <b>587.3511</b> 294.1792        |
| 1394.731        | 697.869         | 10 D            | 4     | <b>488.2827</b> 244.645         |
| 1493.799        | 747.4032        | 11 V            | 3     | <b>373.2558</b> 187.1315        |
| 1592.868        | 796.9374        | 12 V            | 2     | 274.1874 137.5973               |
| ---             | ---             | 13 R            | 1     | <b>175.119</b> 88.0631          |

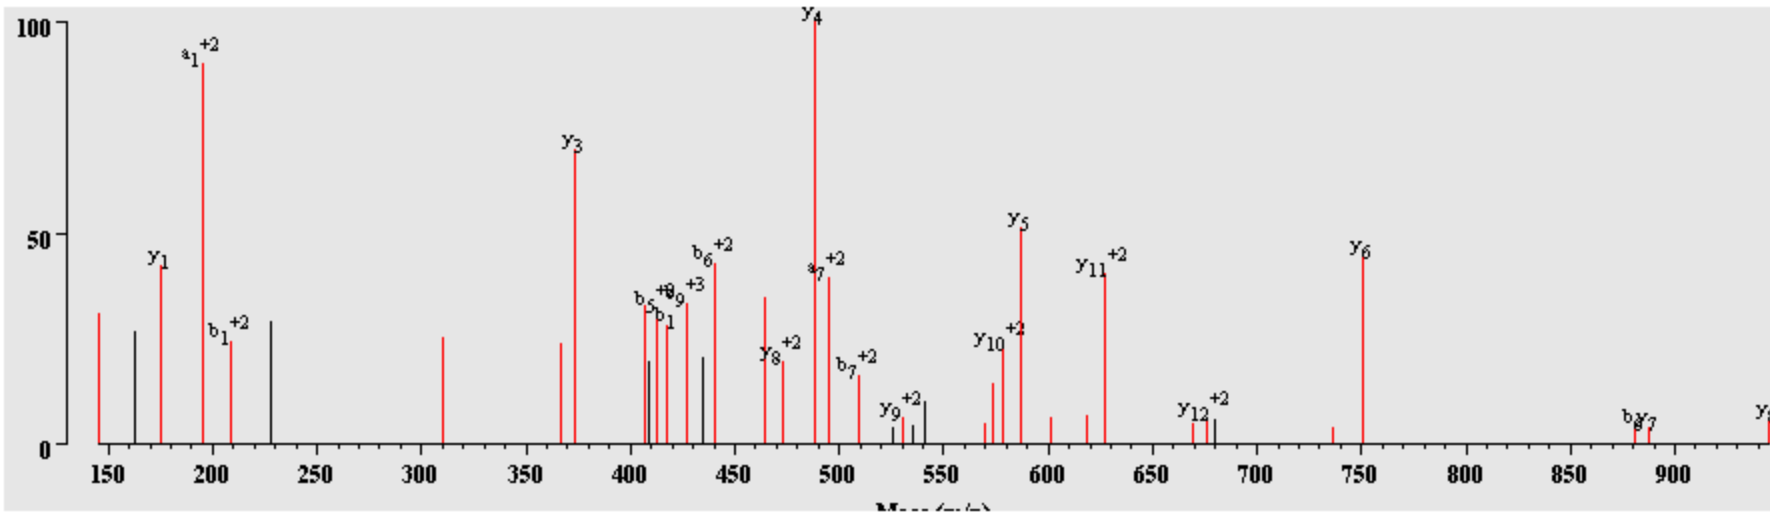

# SGK(iTRAQ4plex)SPILVATAVAAR<sup>+3</sup>/(577.3058<sup>+3</sup>/1729.9026) /P16381

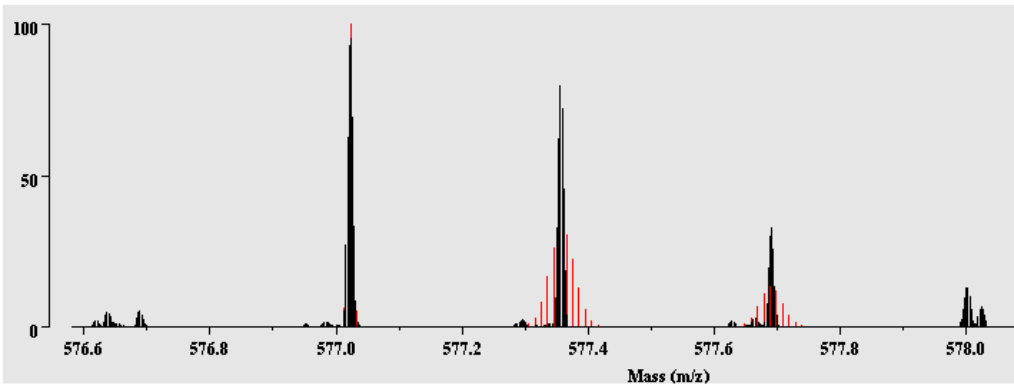

| b               | b+2             | iTRAQ4plex      | y  | y+2                      |
|-----------------|-----------------|-----------------|----|--------------------------|
| 232.1414        | ---             | 1 S             | 15 | ---                      |
| 289.1628        | ---             | 2 G             | 14 | 1497.923 <b>749.4653</b> |
| 561.3599        | 281.1836        | 3 K(iTRAQ4plex) | 13 | 1440.902 720.9546        |
| <b>648.3919</b> | <b>324.6996</b> | 4 S             | 12 | 1168.705 584.8561        |
| 745.4446        | 373.226         | 5 P             | 11 | 1081.673 541.34          |
| <b>858.5287</b> | <b>429.768</b>  | 6 I             | 10 | 984.62 492.8137          |
| <b>971.6128</b> | <b>486.31</b>   | 7 L             | 9  | <b>871.536</b> 436.2716  |
| 1070.681        | <b>535.8442</b> | 8 V             | 8  | <b>758.4519</b> 379.7296 |
| 1141.718        | <b>571.3628</b> | 9 A             | 7  | <b>659.3835</b> 330.1954 |
| 1242.766        | <b>621.8866</b> | 10 T            | 6  | <b>588.3464</b> 294.6768 |
| 1313.803        | 657.4052        | 11 A            | 5  | 487.2987 244.153         |
| 1412.872        | <b>706.9394</b> | 12 V            | 4  | <b>416.2616</b> 208.6344 |
| 1483.909        | 742.458         | 13 A            | 3  | 317.1932 159.1002        |
| 1554.946        | 777.9765        | 14 A            | 2  | 246.1561 123.5817        |
| ---             | ---             | 15 R            | 1  | <b>175.119</b> 88.0631   |

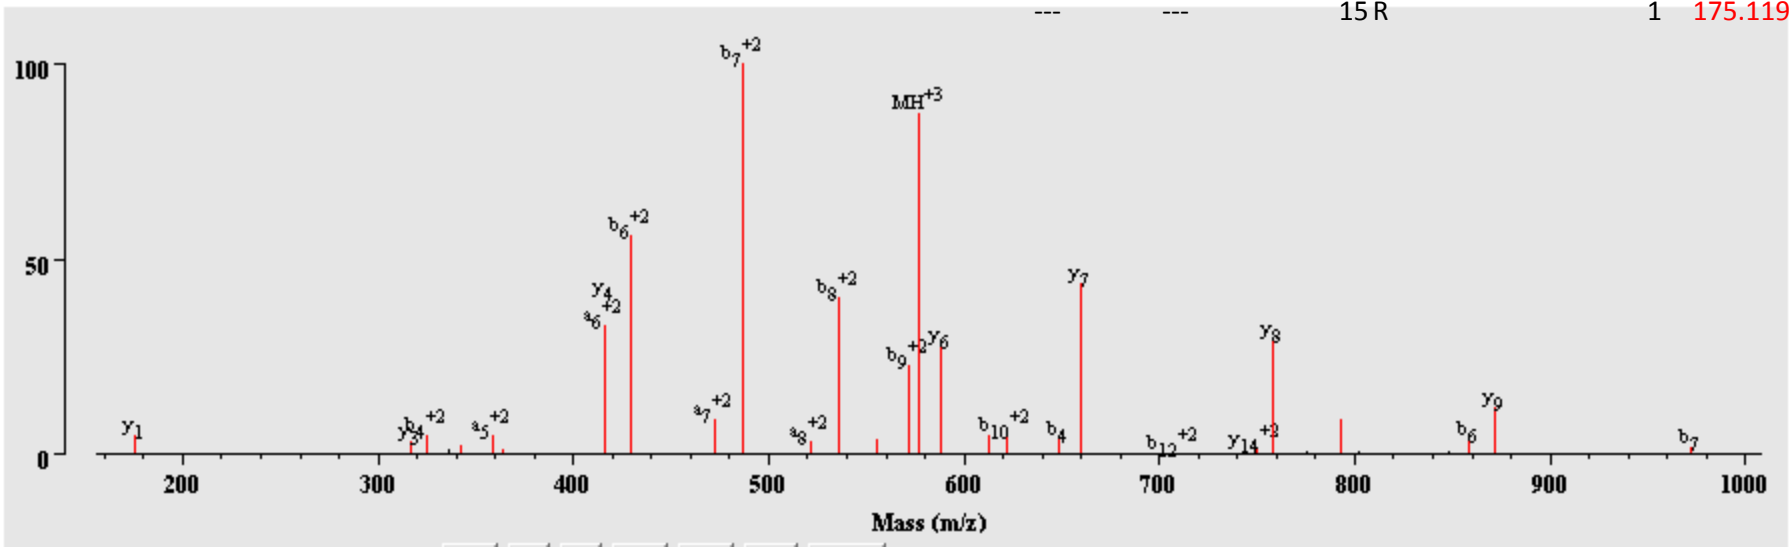

# VFNNDADLSGITEDAPLK(iTRAQ4)LSQAVHK(iTRAQ4)<sup>+5</sup>/ (624.0453<sup>+5</sup>/3116.1966)/P17475

| b       | b+2     | iTRAQ4plex          | y     | y+2             |
|---------|---------|---------------------|-------|-----------------|
| 244.18  | ---     | 1.00 V              | 25.00 | ---             |
| 391.25  | ---     | 2.00 F              | 24.00 | 2871.51 1436.26 |
| 505.29  | ---     | 3.00 N              | 23.00 | 2724.44 1362.72 |
| 619.33  | ---     | 4.00 N              | 22.00 | 2610.40 1305.70 |
| 734.36  | ---     | 5.00 D              | 21.00 | 2496.35 1248.68 |
| 805.40  | ---     | 6.00 A              | 20.00 | 2381.33 1191.17 |
| 920.42  | ---     | 7.00 D              | 19.00 | 2310.29 1155.65 |
| 1033.51 | ---     | 8.00 L              | 18.00 | 2195.26 1098.14 |
| 1120.54 | ---     | 9.00 S              | 17.00 | 2082.18 1041.59 |
| 1177.56 | ---     | 10.00 G             | 16.00 | 1995.15 998.08  |
| 1290.64 | ---     | 11.00 I             | 15.00 | 1938.13 969.57  |
| 1391.69 | ---     | 12.00 T             | 14.00 | 1825.04 913.02  |
| 1520.73 | ---     | 13.00 E             | 13.00 | 1723.99 862.50  |
| 1635.76 | ---     | 14.00 D             | 12.00 | 1594.95 797.98  |
| 1706.80 | ---     | 15.00 A             | 11.00 | 1479.92 740.47  |
| 1803.85 | ---     | 16.00 P             | 10.00 | 1408.89 704.95  |
| 1916.94 | ---     | 17.00 L             | 9.00  | 1311.84 656.42  |
| 2189.13 | 1095.07 | 18.00 K(iTRAQ4plex) | 8.00  | 1198.75 599.88  |
| 2302.22 | 1151.61 | 19.00 L             | 7.00  | 926.55 463.78   |
| 2389.25 | 1195.13 | 20.00 S             | 6.00  | 813.47 407.24   |
| 2517.31 | 1259.16 | 21.00 Q             | 5.00  | 726.44 363.72   |
| 2588.34 | 1294.68 | 22.00 A             | 4.00  | 598.38 299.69   |
| 2687.41 | 1344.21 | 23.00 V             | 3.00  | 527.34 264.17   |
| 2824.47 | 1412.74 | 24.00 H             | 2.00  | 428.27 214.64   |
| ---     | ---     | 25.00 K(iTRAQ4plex) | 1.00  | 291.21 146.11   |

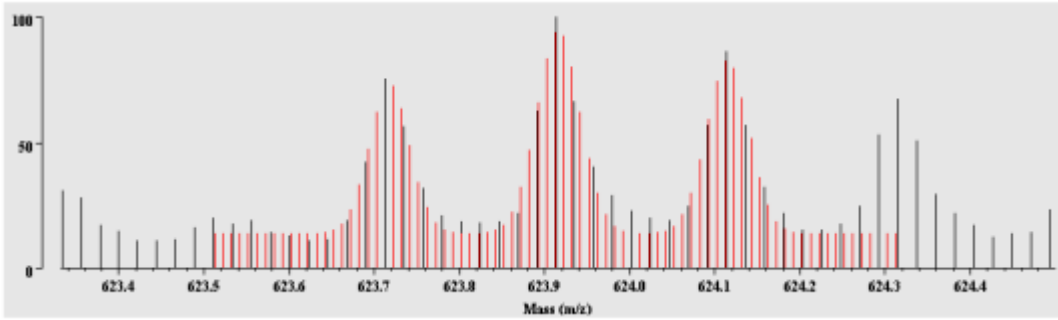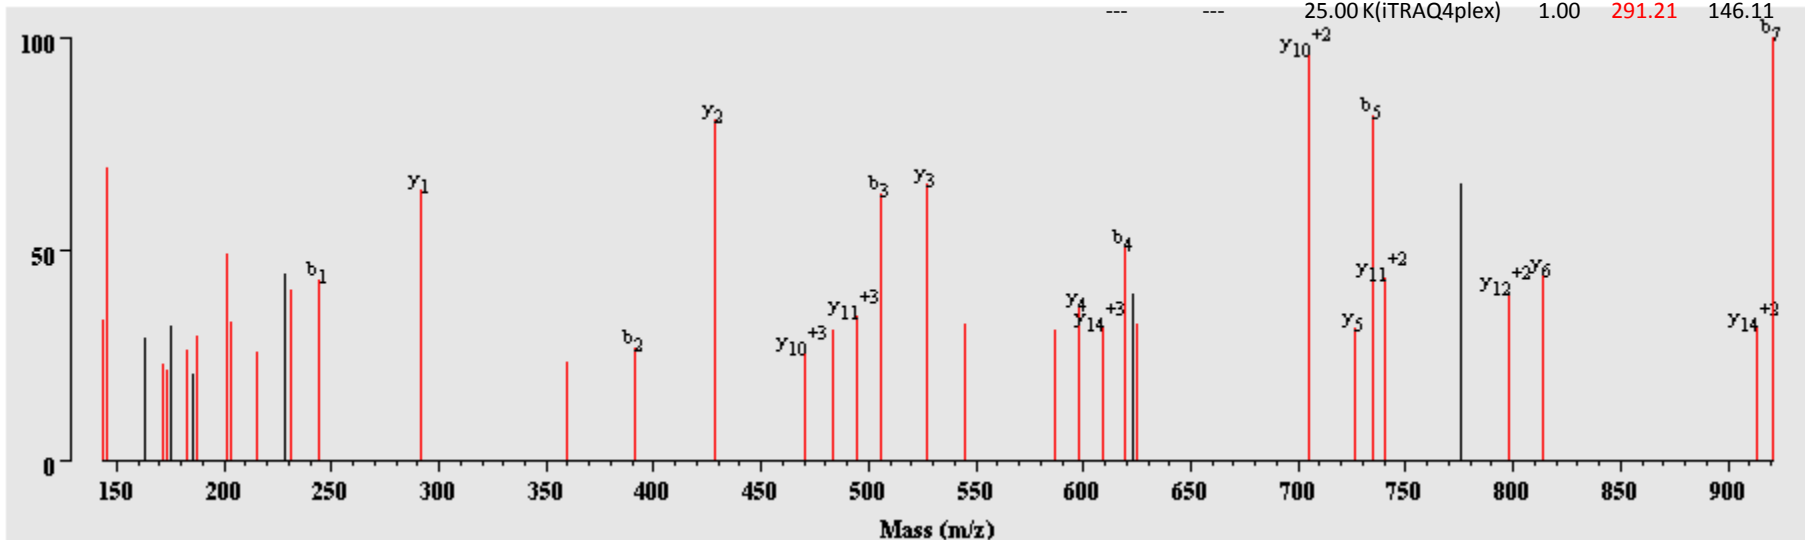

# NITLDDASAPR<sup>+2</sup>/(659.2197<sup>+2</sup>/1317.432)/P18395

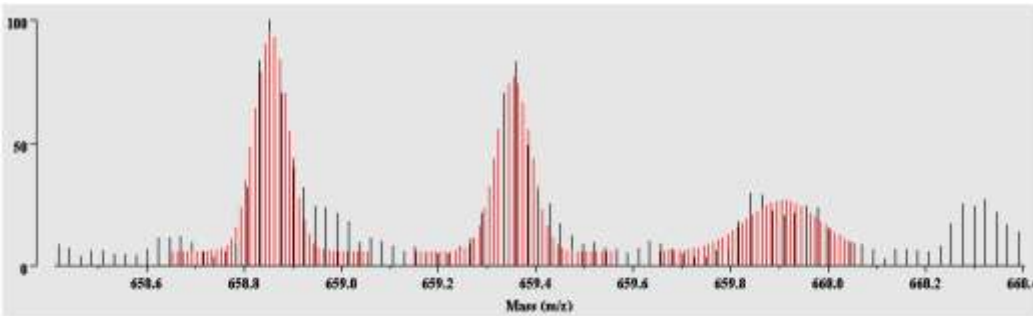

| b        | iTRAQ4plex | y     | y+2               |
|----------|------------|-------|-------------------|
| 259.1523 | 1N         | 11--- | ---               |
| 372.2363 | 2I         | 10    | 1058.548 529.7775 |
| 473.284  | 3T         | 9     | 945.4636 473.2354 |
| 586.3681 | 4L         | 8     | 844.4159 422.7116 |
| 701.395  | 5D         | 7     | 731.3319 366.1696 |
| 816.422  | 6D         | 6     | 616.3049 308.6561 |
| 887.4591 | 7A         | 5     | 501.278 251.1426  |
| 974.4911 | 8S         | 4     | 430.2409 215.6241 |
| 1045.528 | 9A         | 3     | 343.2088 172.1081 |
| 1142.581 | 10P        | 2     | 272.1717 136.5895 |
| ---      | 11R        | 1     | 175.119 88.0631   |

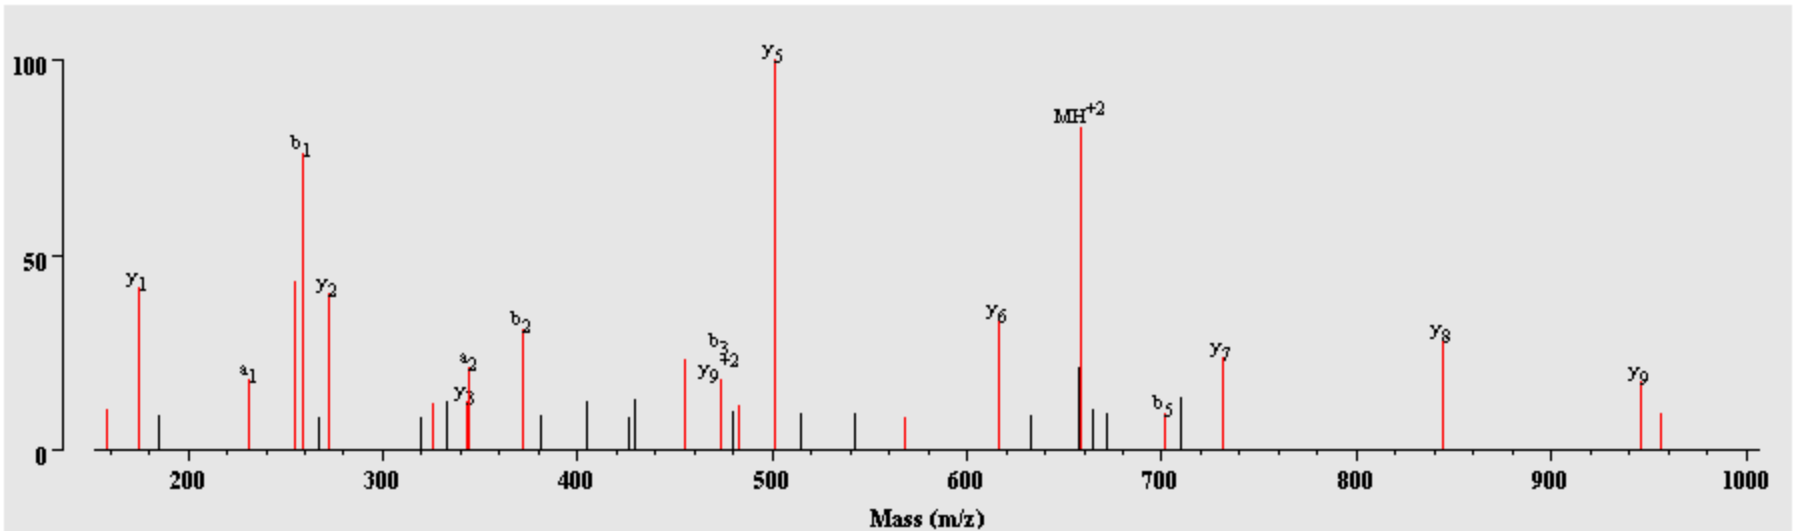

# M(Ox)LPDK(iTRAQ4)DC(Carbamidomethyl)R<sup>+2</sup>/ (670.0473<sup>+2</sup>/1339.0871)/P18760

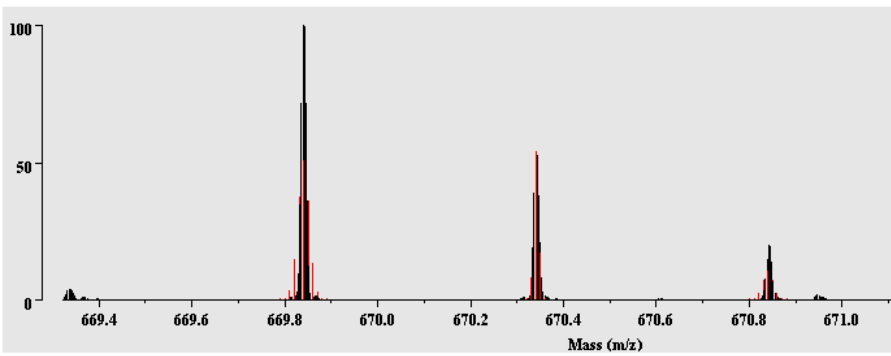

| b        | b+2      | iTRAQ4plex      | y | y+2               |
|----------|----------|-----------------|---|-------------------|
| 292.1447 | ---      | 1 M(Oxidation)  | 8 | ---               |
| 405.2288 | ---      | 2 L             | 7 | 1047.537 524.2723 |
| 502.2816 | ---      | 3 P             | 6 | 934.4533 467.7303 |
| 617.3085 | ---      | 4 D             | 5 | 837.4005 419.2039 |
| 889.5055 | 445.2564 | 5 K(iTRAQ4plex) | 4 | 722.3736 361.6904 |
| 1004.533 | 502.7699 | 6 D             | 3 | 450.1765 225.5919 |
|          |          | C(Carbamidome   |   |                   |
| 1164.563 | 582.7852 | 7 thyl)         | 2 | 335.1496 168.0784 |
| ---      | ---      | 8 R             | 1 | 175.119 88.0631   |

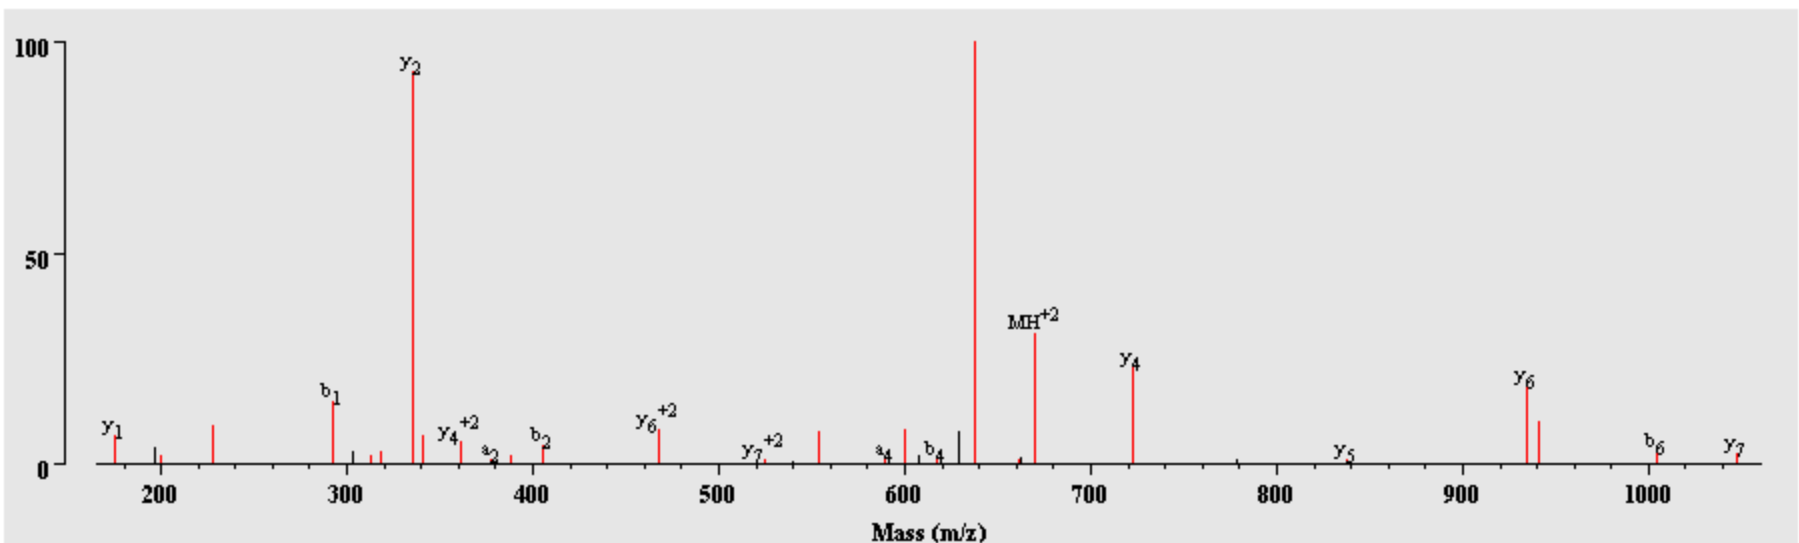



# FNPVTGEVPPRYPLDAR<sup>+3</sup>/(691.7902<sup>+3</sup>/2073.3557)/P20059

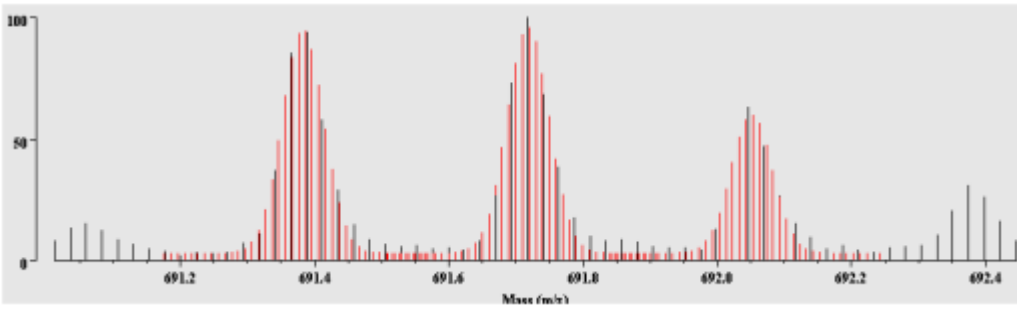

| b        | b+2      | iTRAQ4plex | y  | y+2               |
|----------|----------|------------|----|-------------------|
| 292.1778 | ---      | 1 F        | 17 | ---               |
| 406.2207 | ---      | 2 N        | 16 | 1780.934 890.9707 |
| 503.2734 | ---      | 3 P        | 15 | 1666.891 833.9492 |
| 602.3419 | ---      | 4 V        | 14 | 1569.838 785.4228 |
| 703.3895 | ---      | 5 T        | 13 | 1470.77 735.8886  |
| 760.411  | ---      | 6 G        | 12 | 1369.722 685.3648 |
| 889.4536 | ---      | 7 E        | 11 | 1312.701 656.854  |
| 988.522  | ---      | 8 V        | 10 | 1183.658 592.3327 |
| 1085.575 | ---      | 9 P        | 9  | 1084.59 542.7985  |
| 1182.628 | ---      | 10 P       | 8  | 987.537 494.2722  |
| 1338.729 | 669.868  | 11 R       | 7  | 890.4843 445.7458 |
| 1501.792 | 751.3996 | 12 Y       | 6  | 734.3832 367.6952 |
| 1598.845 | 799.926  | 13 P       | 5  | 571.3198 286.1636 |
| 1711.929 | 856.468  | 14 L       | 4  | 474.2671 237.6372 |
| 1826.956 | 913.9815 | 15 D       | 3  | 361.183 181.0951  |
| 1897.993 | 949.5001 | 16 A       | 2  | 246.1561 123.5817 |
| ---      | ---      | 17 R       | 1  | 175.119 88.0631   |

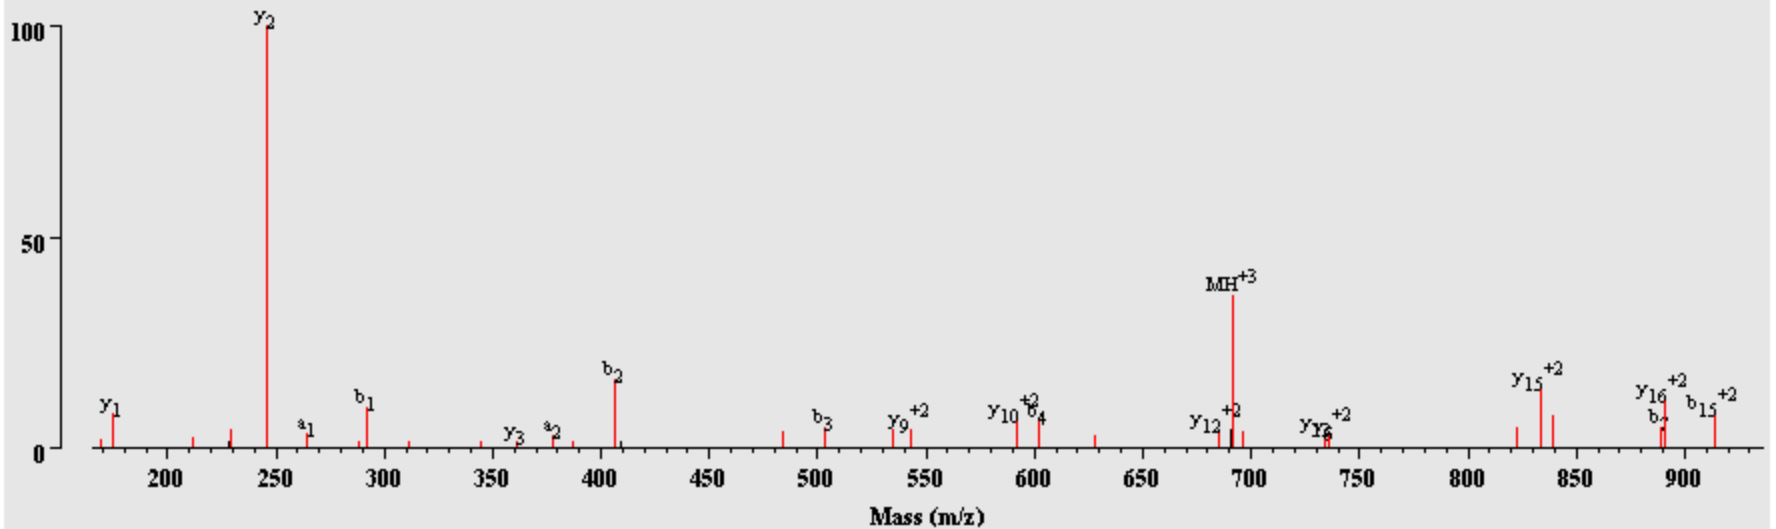

# C(Carbamidomethyl)K(iTRAQ4)VNSGAFPAPIEK(iTRAQ4)<sup>+3</sup> /(650.9452<sup>+3</sup>/1950.8207)/P20760

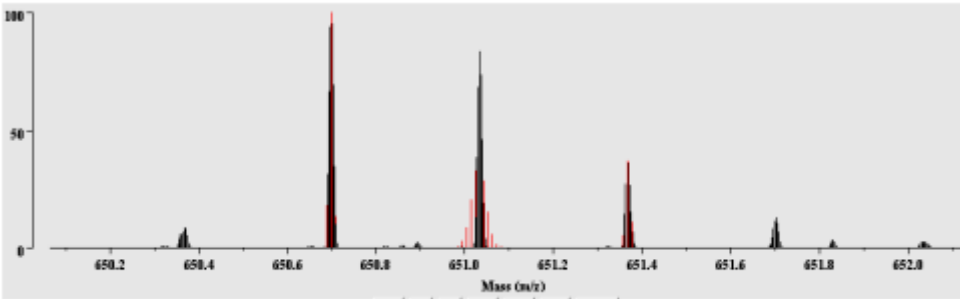

| b        | b+2      | iTRAQ4plex<br>C(Carbamidome<br>thyl) | y  | y+2               |
|----------|----------|--------------------------------------|----|-------------------|
| 305.14   | ---      | 1                                    | 14 | ---               |
| 577.337  | 289.1721 | 2                                    | 13 | 1645.952 823.4794 |
| 676.4054 | 338.7064 | 3                                    | 12 | 1373.755 687.3809 |
| 790.4484 | 395.7278 | 4                                    | 11 | 1274.686 637.8467 |
| 877.4804 | 439.2438 | 5                                    | 10 | 1160.643 580.8252 |
| 934.5018 | 467.7546 | 6                                    | 9  | 1073.611 537.3092 |
| 1005.539 | 503.2731 | 7                                    | 8  | 1016.59 508.7985  |
| 1152.607 | 576.8073 | 8                                    | 7  | 945.5526 473.2799 |
| 1249.66  | 625.3337 | 9                                    | 6  | 798.4842 399.7457 |
| 1320.697 | 660.8523 | 10                                   | 5  | 701.4314 351.2193 |
| 1417.75  | 709.3786 | 11                                   | 4  | 630.3943 315.7008 |
| 1530.834 | 765.9207 | 12                                   | 3  | 533.3415 267.1744 |
| 1659.877 | 830.442  | 13                                   | 2  | 420.2575 210.6324 |
| ---      | ---      | 14                                   | 1  | 291.2149 146.1111 |

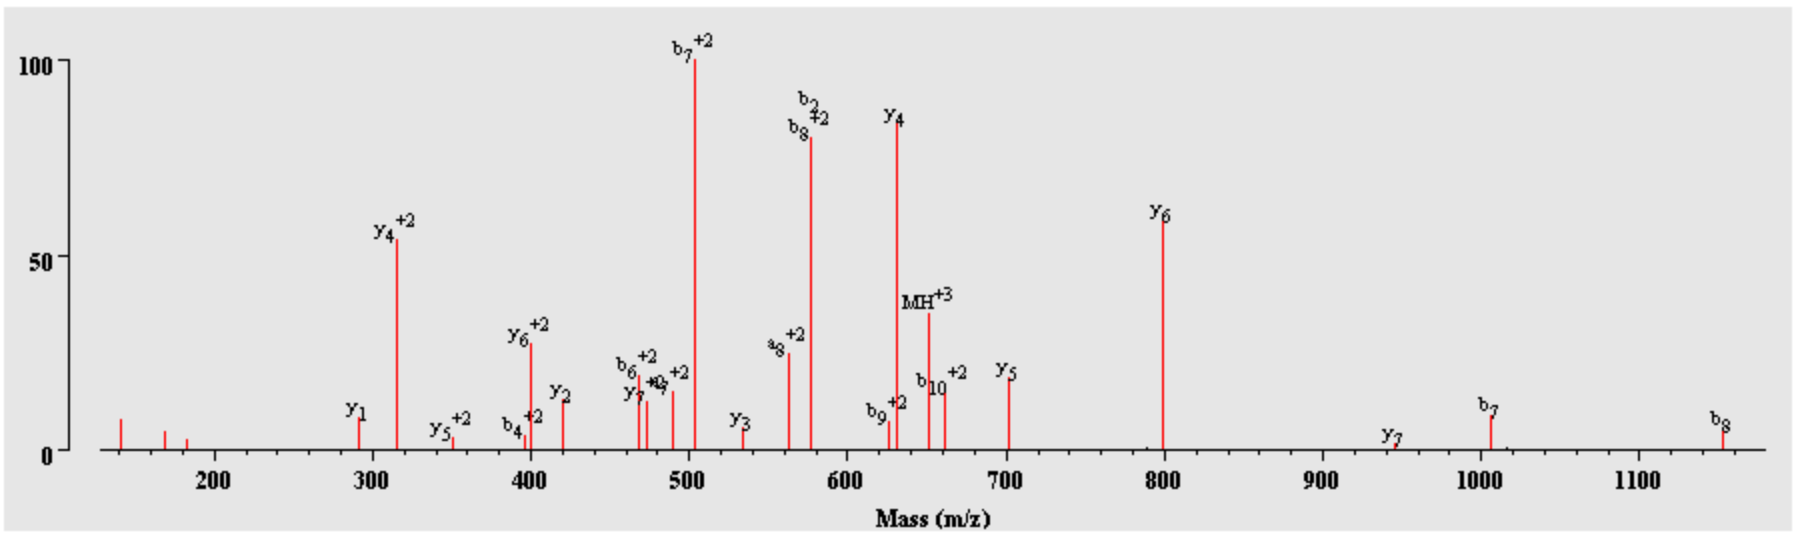

# VTFGLFGK(iTRAQ4)<sup>+2</sup>/(579.1217<sup>+2</sup>/1157.236)/P24368

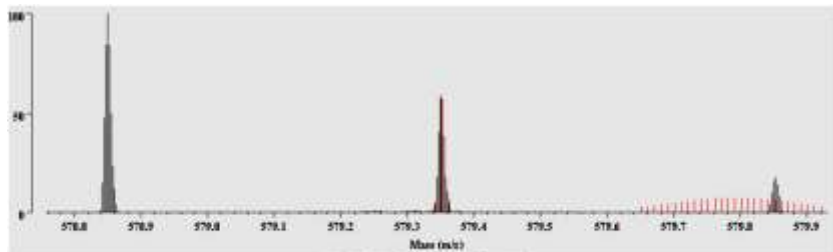

| b        | iTRAQ4plex      | y          | y+2      |
|----------|-----------------|------------|----------|
| 244.1778 | 1 V             | 8---       | ---      |
| 345.2254 | 2 T             | 7 913.5264 | 457.2668 |
| 492.2938 | 3 F             | 6 812.4787 | 406.743  |
| 549.3153 | 4 G             | 5 665.4103 | 333.2088 |
| 662.3994 | 5 L             | 4 608.3888 | 304.698  |
| 809.4678 | 6 F             | 3 495.3047 | 248.156  |
| 866.4893 | 7 G             | 2 348.2363 | 174.6218 |
| ---      | 8 K(iTRAQ4plex) | 1 291.2149 | 146.1111 |

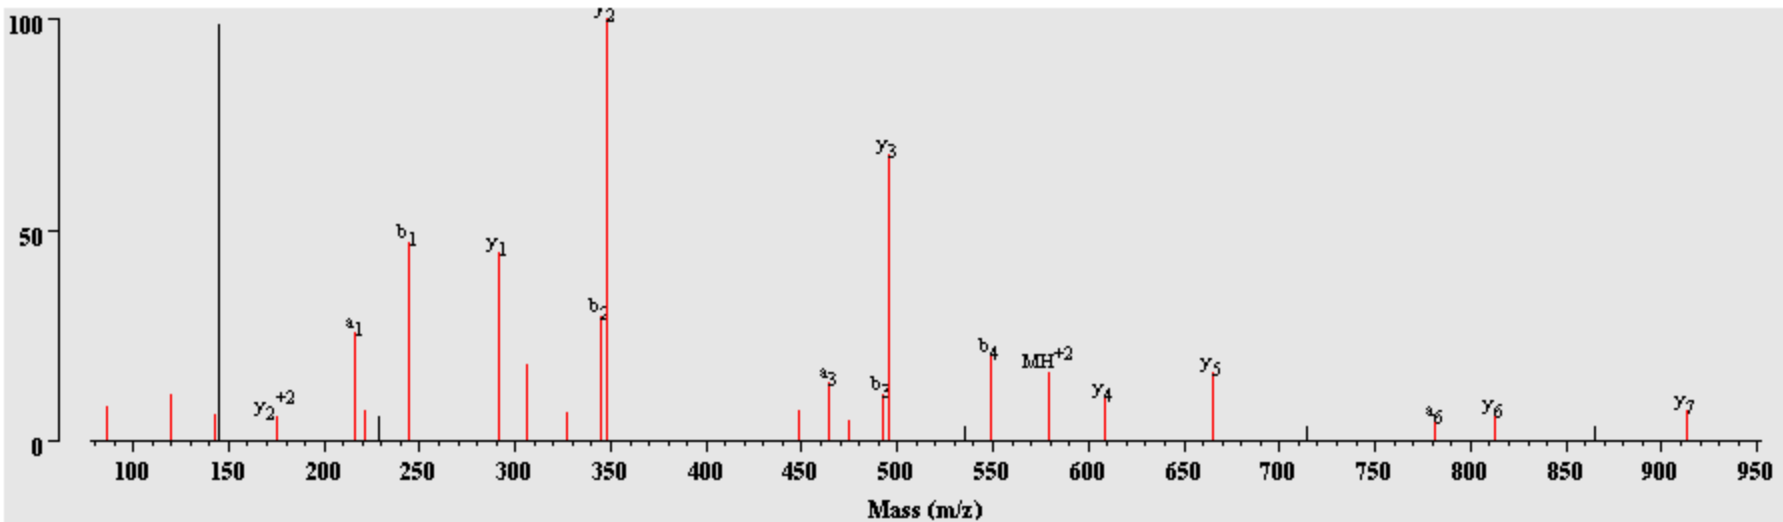

# TALVANTSNM(Ox)PVAAR<sup>+3</sup>/(559.593<sup>+3</sup>/1676.7642)/P50516

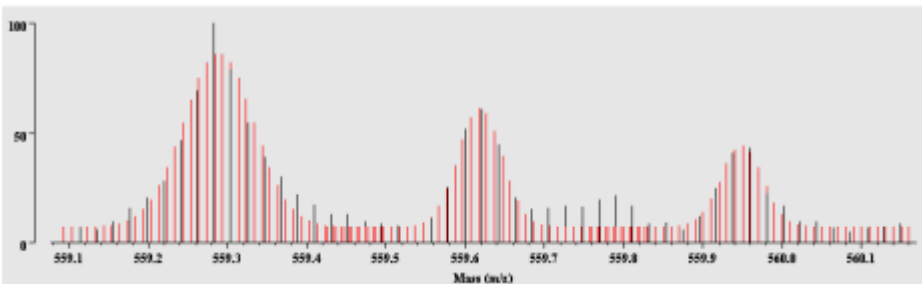

| b        | iTRAQ4plex      | y           | y+2      |
|----------|-----------------|-------------|----------|
| 246.157  | 1 T             | 15 ---      | ---      |
| 317.1941 | 2 A             | 14 1430.742 | 715.8747 |
| 430.2782 | 3 L             | 13 1359.705 | 680.3561 |
| 529.3466 | 4 V             | 12 1246.621 | 623.8141 |
| 600.3837 | 5 A             | 11 1147.552 | 574.2799 |
| 714.4267 | 6 N             | 10 1076.515 | 538.7613 |
| 815.4743 | 7 T             | 9 962.4724  | 481.7398 |
| 902.5064 | 8 S             | 8 861.4247  | 431.216  |
| 1016.549 | 9 N             | 7 774.3927  | 387.7    |
| 1163.585 | 10 M(Oxidation) | 6 660.3498  | 330.6785 |
| 1260.637 | 11 P            | 5 513.3144  | 257.1608 |
| 1359.706 | 12 V            | 4 416.2616  | 208.6344 |
| 1430.743 | 13 A            | 3 317.1932  | 159.1002 |
| 1501.78  | 14 A            | 2 246.1561  | 123.5817 |
| ---      | 15 R            | 1 175.119   | 88.0631  |

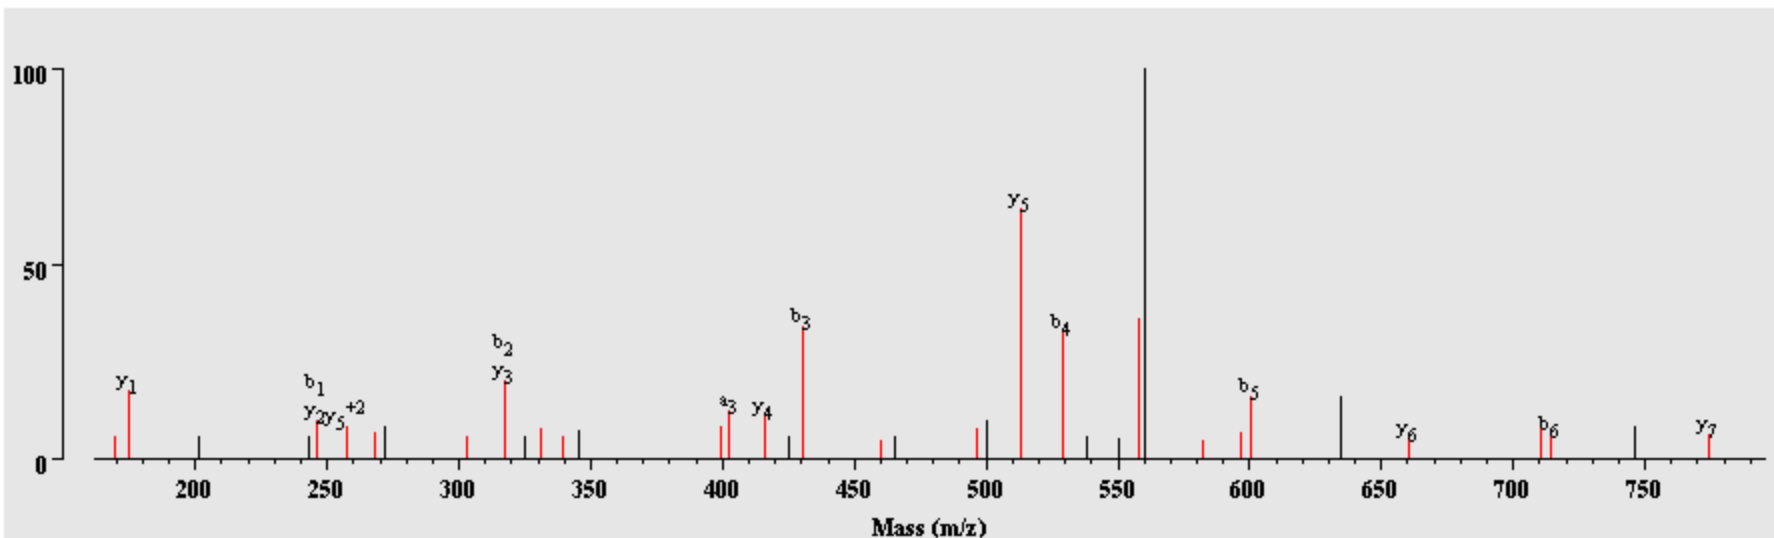

# SLNILTAFR<sup>+2</sup>/(589.2013<sup>+2</sup>/1179.3952/P52555)

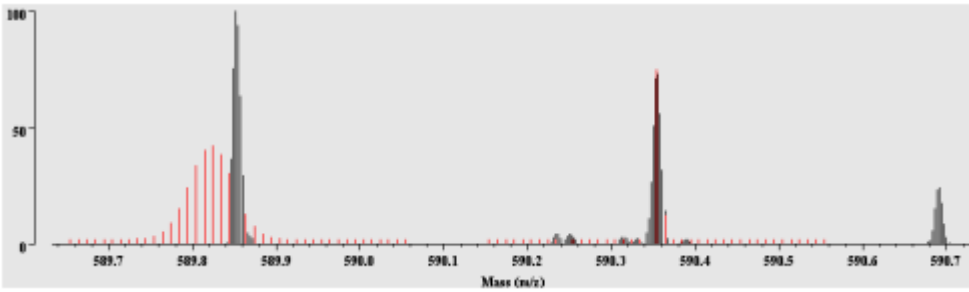

b

|          | iTRAQ4plex | y          | y+2      |
|----------|------------|------------|----------|
| 232.1414 | 1S         | 9---       | ---      |
| 345.2254 | 2L         | 8 947.5673 | 474.2873 |
| 459.2684 | 3N         | 7 834.4832 | 417.7452 |
| 572.3524 | 4I         | 6 720.4403 | 360.7238 |
| 685.4365 | 5L         | 5 607.3562 | 304.1817 |
| 786.4842 | 6T         | 4 494.2722 | 247.6397 |
| 857.5213 | 7A         | 3 393.2245 | 197.1159 |
| 1004.59  | 8F         | 2 322.1874 | 161.5973 |
| ---      | 9R         | 1 175.119  | 88.0631  |

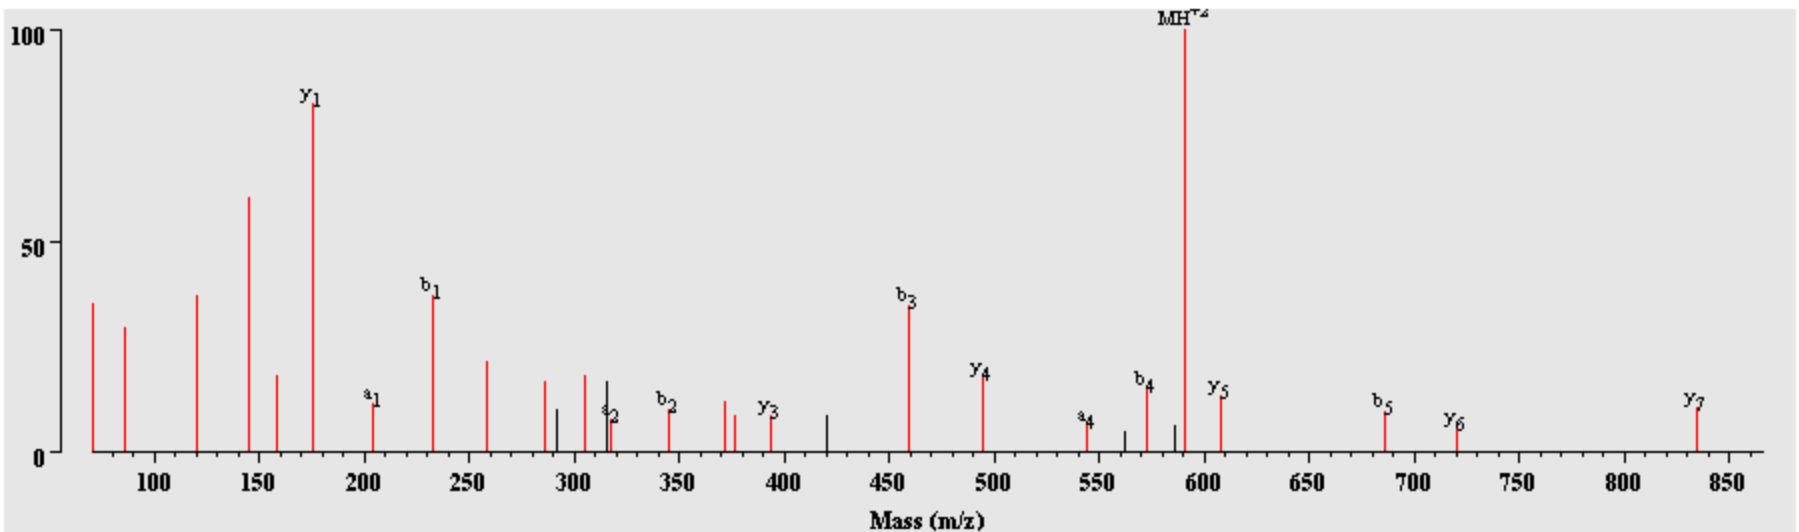

# M(Ox)FEDPETTR<sup>+2</sup>/(643.6195<sup>+2</sup>/1286.2315)/P60229

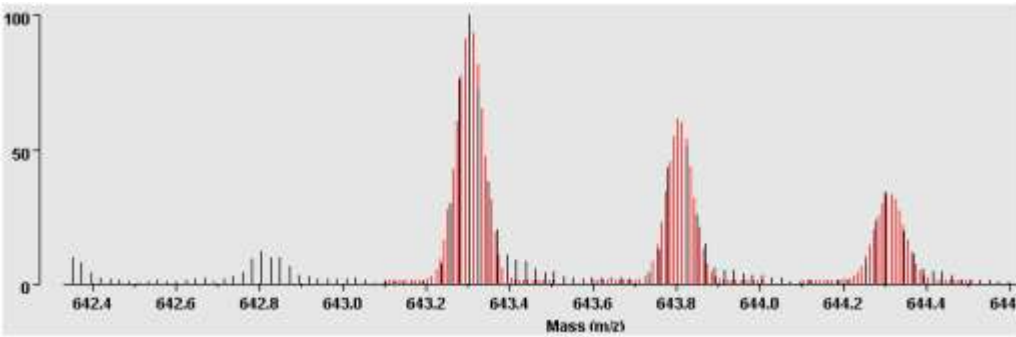

| b        | iTRAQ4plex<br>M(Oxidati | y          | y+2      |
|----------|-------------------------|------------|----------|
| 292.1447 | 1 on)                   | 9---       | ---      |
| 439.2132 | 2 F                     | 8 994.4476 | 497.7274 |
| 568.2557 | 3 E                     | 7 847.3792 | 424.1932 |
| 683.2827 | 4 D                     | 6 718.3366 | 359.6719 |
| 780.3355 | 5 P                     | 5 603.3097 | 302.1585 |
| 909.378  | 6 E                     | 4 506.2569 | 253.6321 |
| 1010.426 | 7 T                     | 3 377.2143 | 189.1108 |
| 1111.473 | 8 T                     | 2 276.1666 | 138.587  |
| ---      | 9 R                     | 1 175.119  | 88.0631  |

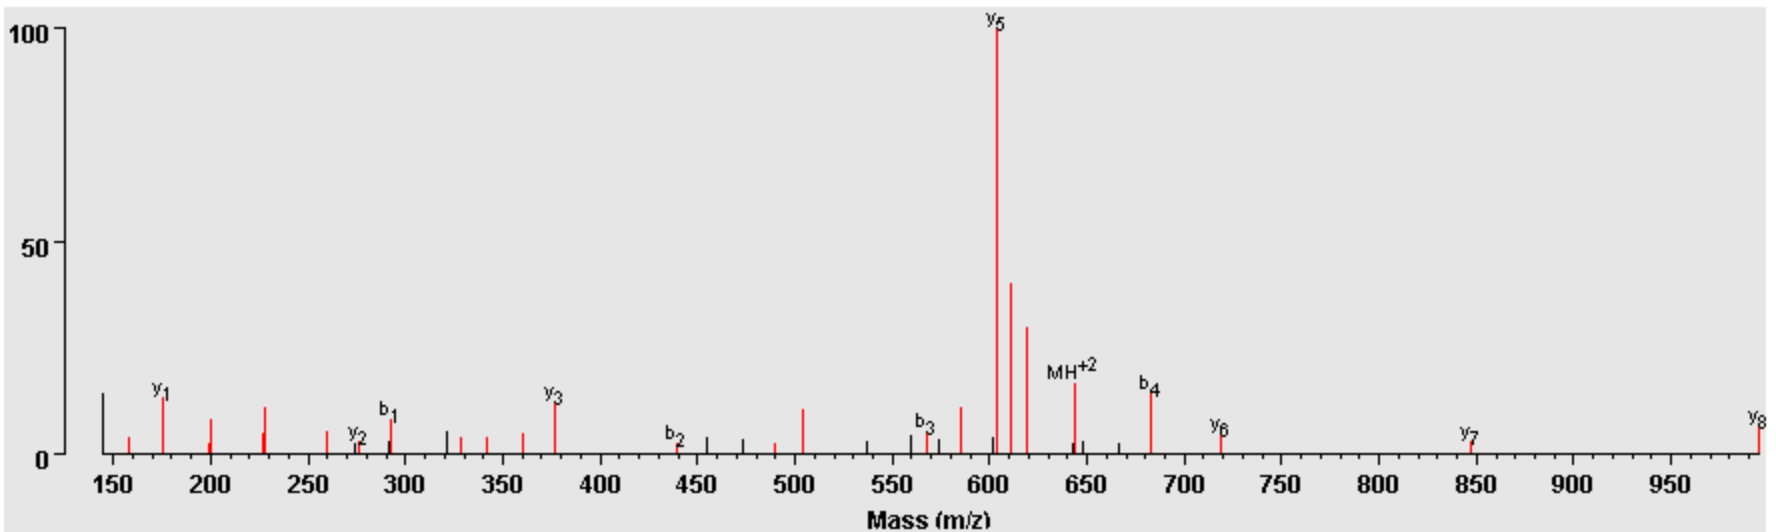

# M(Met-loss)TK(iTRAQ4)GTSSFGK(iTRAQ4)<sup>+3</sup>/ (449.0797<sup>+3</sup>/1345.2243)/P61928

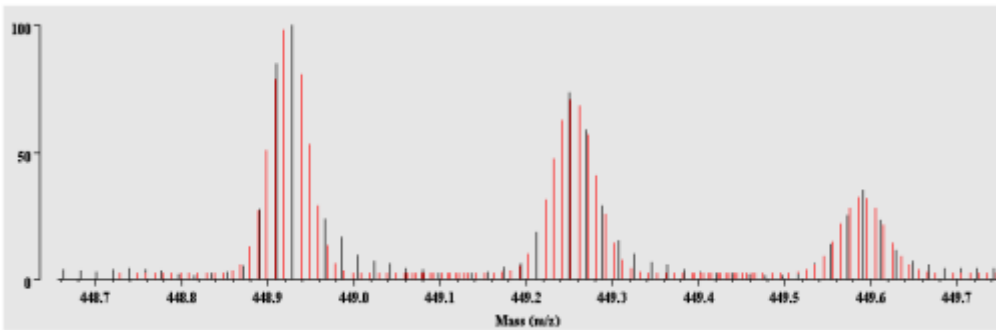

| b        | b+2      | iTRAQ4plex       | y  | y+2               |
|----------|----------|------------------|----|-------------------|
| 145.1093 | ---      | 1 M(Met-loss)    | 10 | ---               |
| 246.157  | ---      | 2 T              | 9  | 1200.683 600.845  |
| 518.354  | 259.6807 | 3 K(iTRAQ4plex)  | 8  | 1099.635 550.3211 |
| 575.3755 | 288.1914 | 4 G              | 7  | 827.4379 414.2226 |
| 676.4232 | 338.7152 | 5 T              | 6  | 770.4165 385.7119 |
| 763.4552 | 382.2312 | 6 S              | 5  | 669.3688 335.188  |
| 850.4872 | 425.7473 | 7 S              | 4  | 582.3368 291.672  |
| 997.5557 | 499.2815 | 8 F              | 3  | 495.3047 248.156  |
| 1054.577 | 527.7922 | 9 G              | 2  | 348.2363 174.6218 |
| ---      | ---      | 10 K(iTRAQ4plex) | 1  | 291.2149 146.1111 |

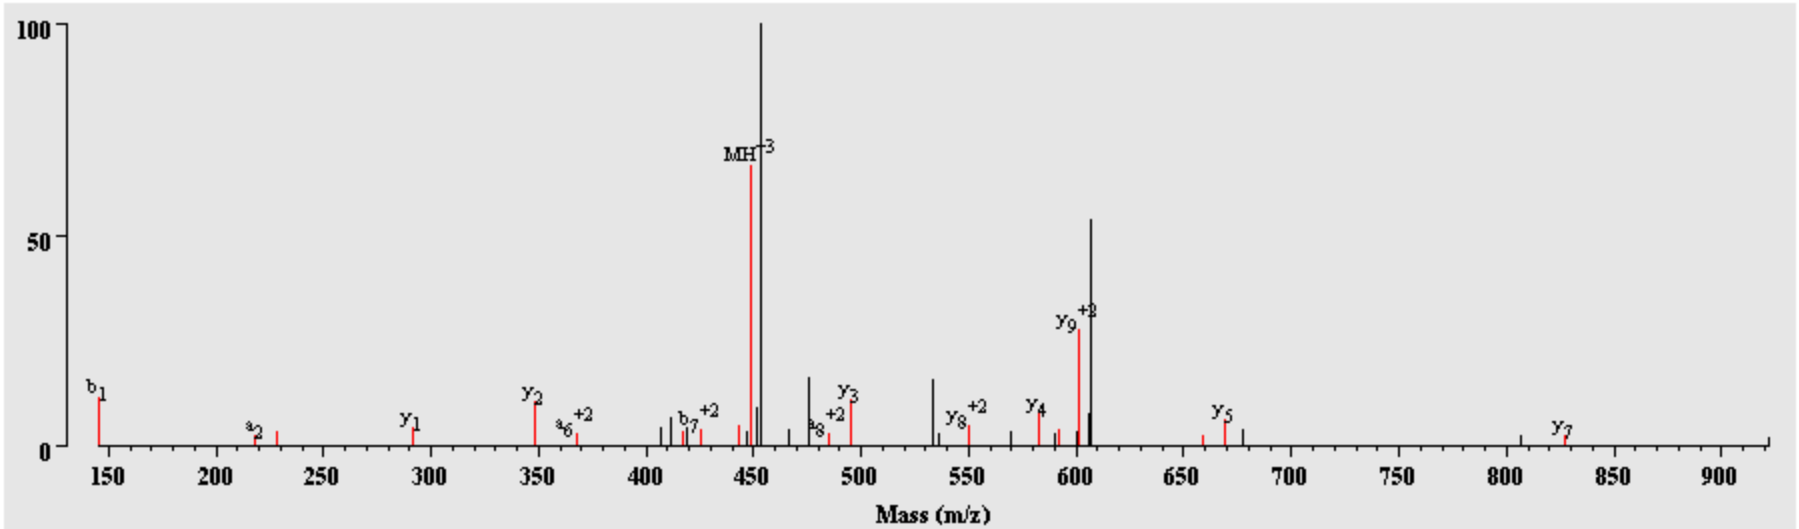

# HGYIGEFEIIDDHR<sup>+4</sup>/(462.2564<sup>+4</sup>/1846.0035)/P62245

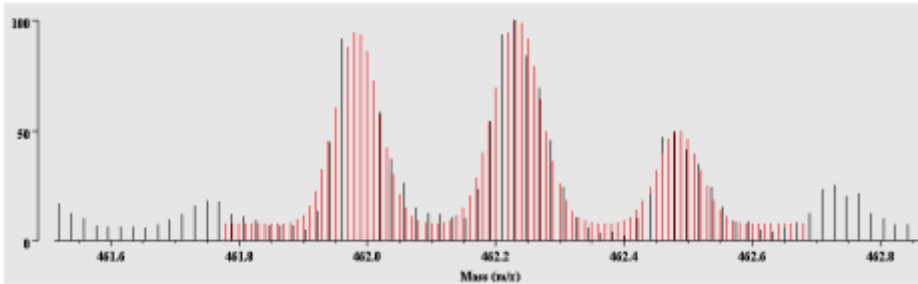

| b        | b+2      | iTRAQ4plex | y           | y+2      |
|----------|----------|------------|-------------|----------|
| 282.1683 | 141.5878 | 1 H        | 14 ---      | ---      |
| 339.1897 | 170.0985 | 2 G        | 13 1563.744 | 782.3755 |
| 502.253  | 251.6302 | 3 Y        | 12 1506.722 | 753.8648 |
| 615.3371 | 308.1722 | 4 I        | 11 1343.659 | 672.3331 |
| 672.3586 | 336.6829 | 5 G        | 10 1230.575 | 615.7911 |
| 801.4012 | 401.2042 | 6 E        | 9 1173.554  | 587.2804 |
| 948.4696 | 474.7384 | 7 F        | 8 1044.511  | 522.7591 |
| 1077.512 | 539.2597 | 8 E        | 7 897.4425  | 449.2249 |
| 1190.596 | 595.8018 | 9 I        | 6 768.3999  | 384.7036 |
| 1303.68  | 652.3438 | 10 I       | 5 655.3158  | 328.1615 |
| 1418.707 | 709.8573 | 11 D       | 4 542.2318  | 271.6195 |
| 1533.734 | 767.3707 | 12 D       | 3 427.2048  | 214.106  |
| 1670.793 | 835.9002 | 13 H       | 2 312.1779  | 156.5926 |
| ---      | ---      | 14 R       | 1 175.119   | 88.0631  |

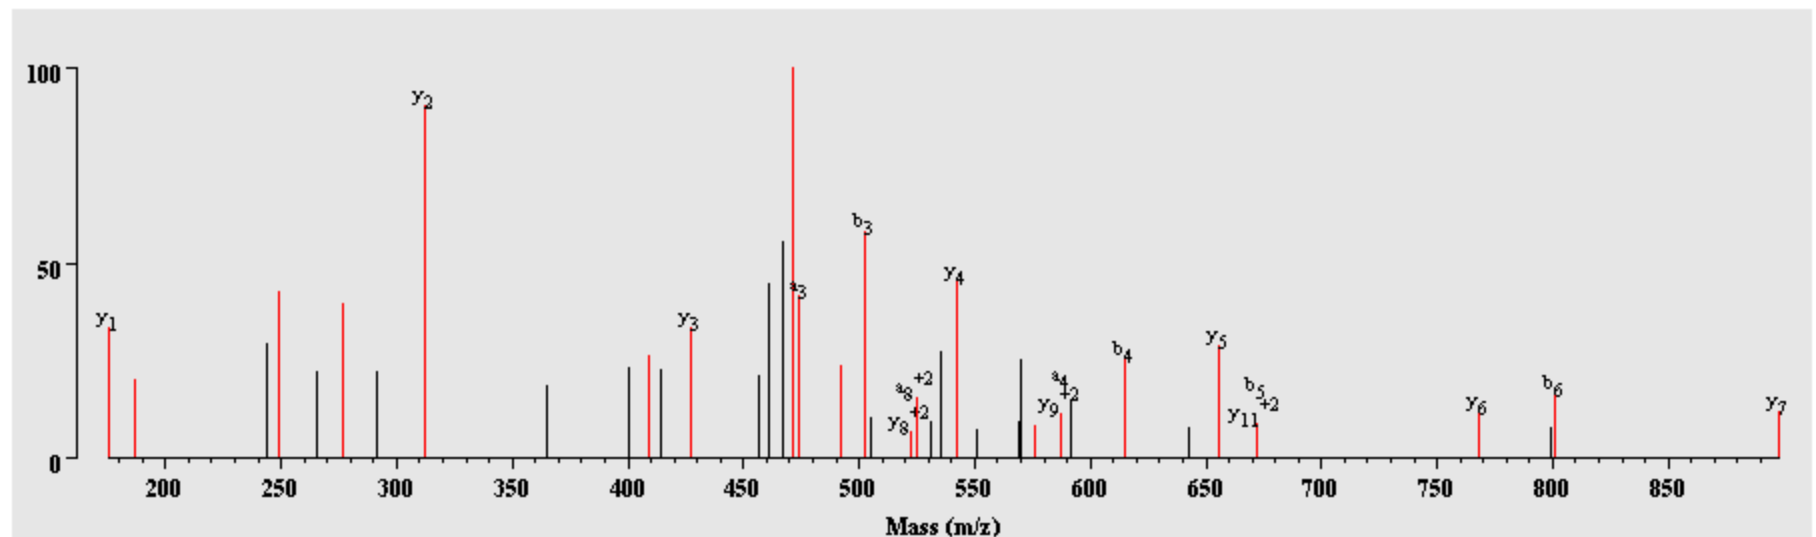



# GLTPSQIGVILRDSHGVAQVR+4/(587.9329+4/2348.7094/P62278)

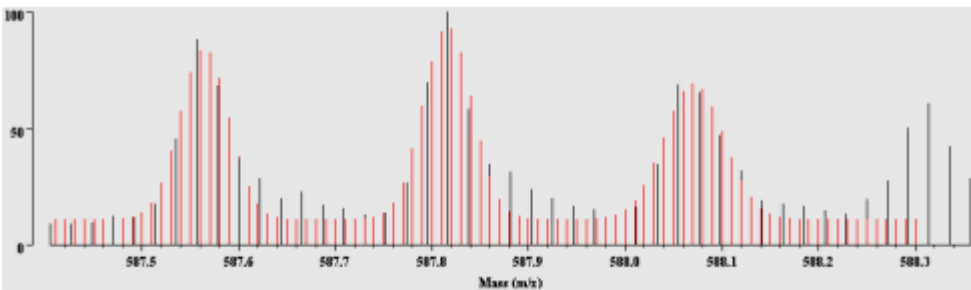

| b           | b+2      | iTRAQ4plex | y     | y+2               |
|-------------|----------|------------|-------|-------------------|
| 202.1308--- |          | 1 G        | 21--- | ---               |
| 315.2149--- |          | 2 L        | 20    | 2146.209 1073.608 |
| 416.2625--- |          | 3 T        | 19    | 2033.125 1017.066 |
| 513.3153--- |          | 4 P        | 18    | 1932.077 966.5423 |
| 600.3473--- |          | 5 S        | 17    | 1835.025 918.0159 |
| 728.4059--- |          | 6 Q        | 16    | 1747.993 874.4999 |
| 841.49---   |          | 7 I        | 15    | 1619.934 810.4706 |
| 898.5114--- |          | 8 G        | 14    | 1506.85 753.9286  |
| 997.5799--- |          | 9 V        | 13    | 1449.829 725.4179 |
| 1110.664--- |          | 10 I       | 12    | 1350.76 675.8837  |
| 1223.748--- |          | 11 L       | 11    | 1237.676 619.3416 |
| 1379.849    | 690.4282 | 12 R       | 10    | 1124.592 562.7996 |
| 1494.876    | 747.9417 | 13 D       | 9     | 968.4908 484.749  |
| 1581.908    | 791.4577 | 14 S       | 8     | 853.4639 427.2356 |
| 1718.967    | 859.9871 | 15 H       | 7     | 766.4318 383.7196 |
| 1775.988    | 888.4979 | 16 G       | 6     | 629.3729 315.1901 |
| 1875.057    | 938.0321 | 17 V       | 5     | 572.3515 286.6794 |
| 1946.094    | 973.5506 | 18 A       | 4     | 473.2831 237.1452 |
| 2074.153    | 1037.58  | 19 Q       | 3     | 402.2459 201.6266 |
| 2173.221    | 1087.114 | 20 V       | 2     | 274.1874 137.5973 |
| ---         | ---      | 21 R       | 1     | 175.119 88.0631   |

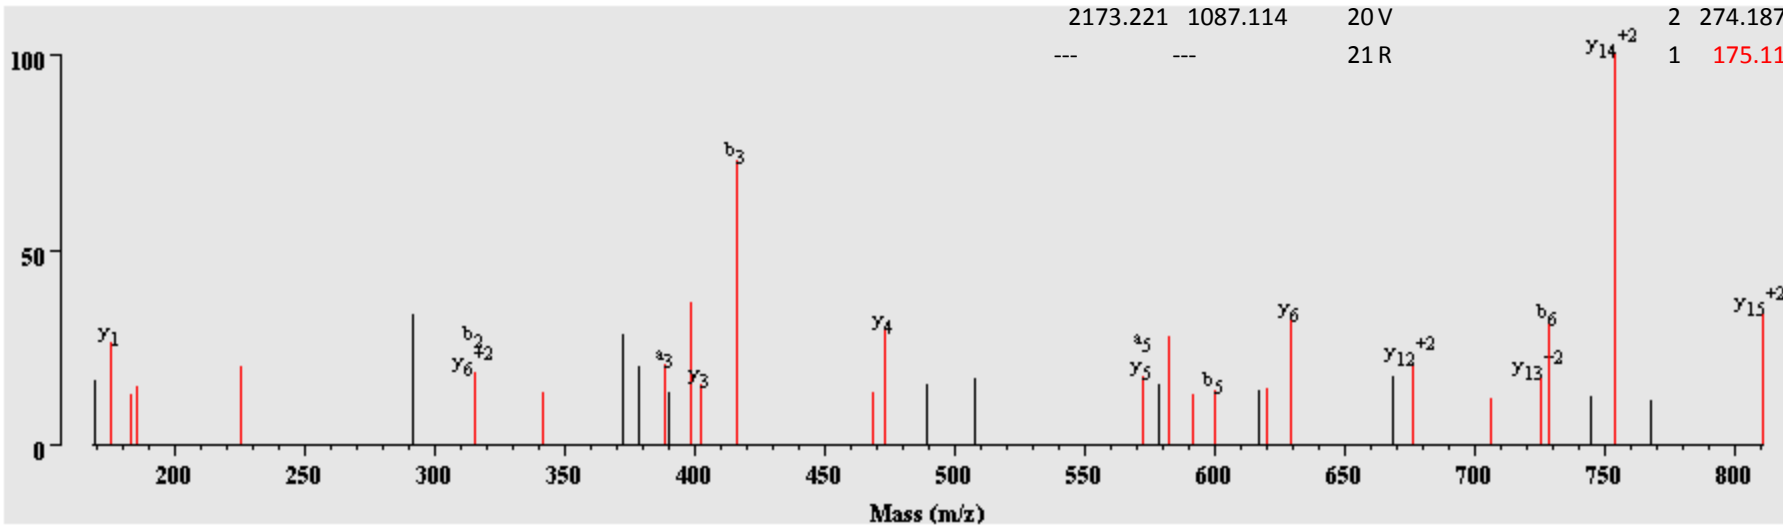

# DLTTAGAVTQC(Carbamidomethyl)YR<sup>+3</sup>/ (534.211<sup>+3</sup>/1600.6183)/P62717

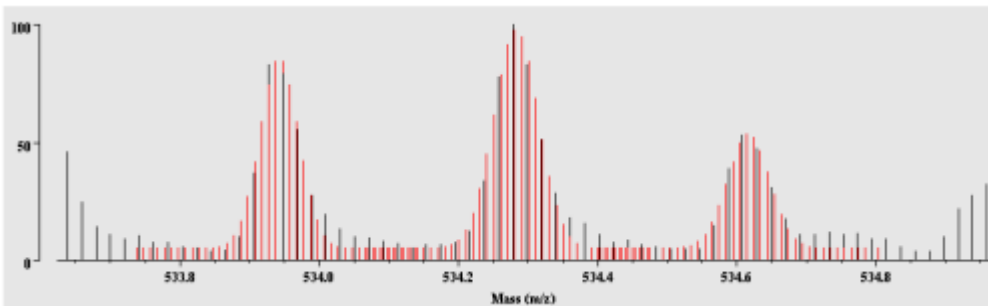

| b        | iTRAQ4plex    | y           | y+2      |
|----------|---------------|-------------|----------|
| 260.1363 | 1D            | 13 ---      | ---      |
| 373.2203 | 2L            | 12 1340.663 | 670.835  |
| 474.268  | 3T            | 11 1227.579 | 614.293  |
| 575.3157 | 4T            | 10 1126.531 | 563.7691 |
| 646.3528 | 5A            | 9 1025.483  | 513.2453 |
| 703.3743 | 6G            | 8 954.4462  | 477.7267 |
| 774.4114 | 7A            | 7 897.4247  | 449.216  |
| 873.4798 | 8V            | 6 826.3876  | 413.6974 |
| 974.5275 | 9T            | 5 727.3192  | 364.1632 |
| 1102.586 | 10Q           | 4 626.2715  | 313.6394 |
|          | C(Carbamidome |             |          |
| 1262.617 | 11 thyl)      | 3 498.2129  | 249.6101 |
| 1425.68  | 12 Y          | 2 338.1823  | 169.5948 |
| ---      | 13 R          | 1 175.119   | 88.0631  |

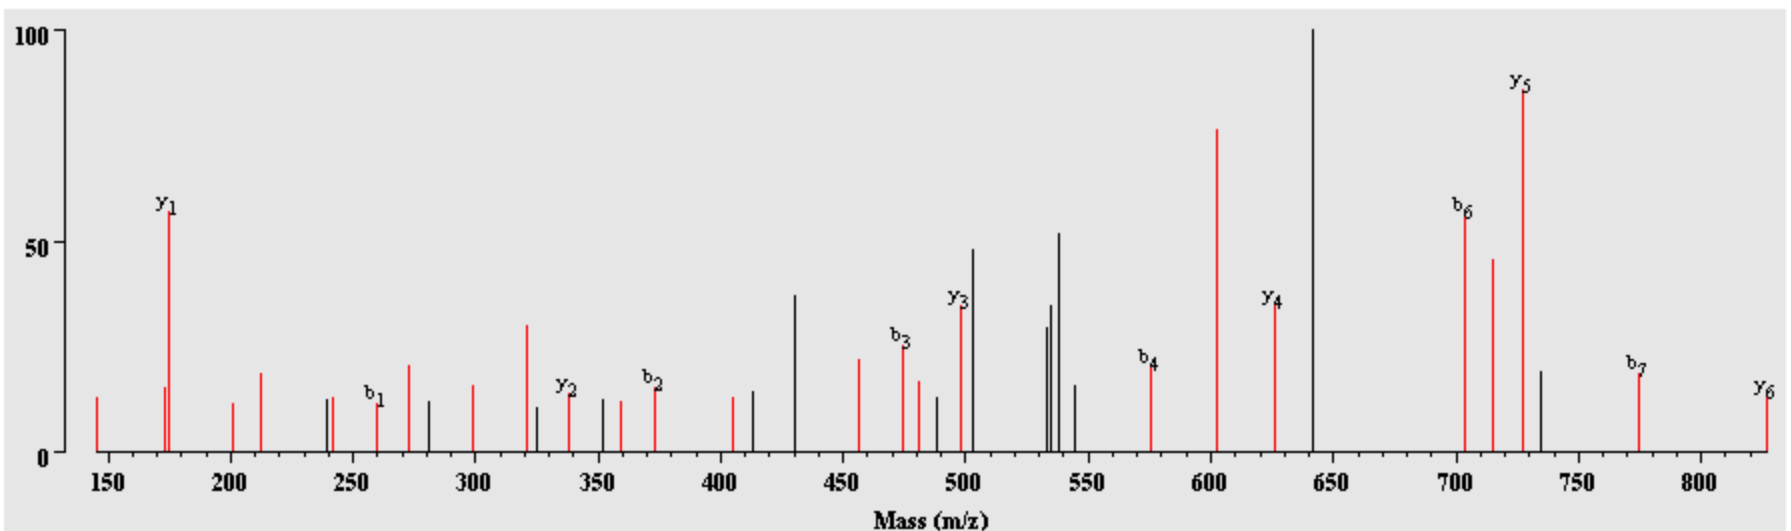

# AAQDRDQIYR<sup>+3</sup>/(460.8363<sup>+3</sup>/1380.4941)/P62996

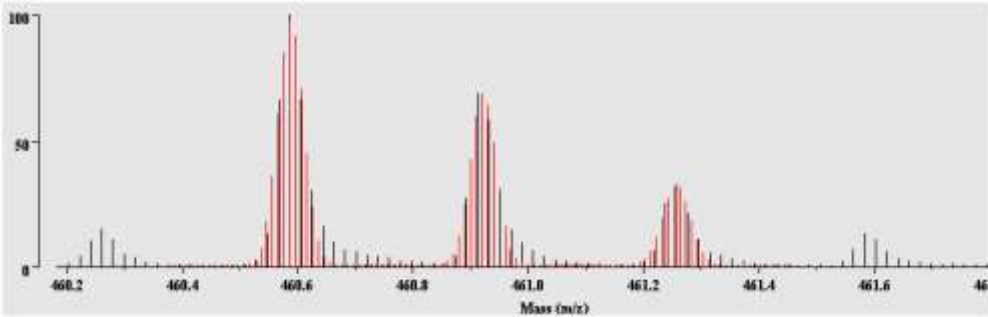

| b        | b+2      | iTRAQ4plex | y  | y+2               |
|----------|----------|------------|----|-------------------|
| 216.1465 | ---      | 1A         | 10 | ---               |
| 287.1836 | ---      | 2A         | 9  | 1164.576 582.7914 |
| 415.2421 | ---      | 3Q         | 8  | 1093.539 547.2729 |
| 530.2691 | ---      | 4D         | 7  | 965.4799 483.2436 |
| 686.3702 | 343.6887 | 5R         | 6  | 850.453 425.7301  |
| 801.3971 | 401.2022 | 6D         | 5  | 694.3519 347.6796 |
| 929.4557 | 465.2315 | 7Q         | 4  | 579.3249 290.1661 |
| 1042.54  | 521.7735 | 8I         | 3  | 451.2663 226.1368 |
| 1205.603 | 603.3052 | 9Y         | 2  | 338.1823 169.5948 |
| ---      | ---      | 10R        | 1  | 175.119 88.0631   |

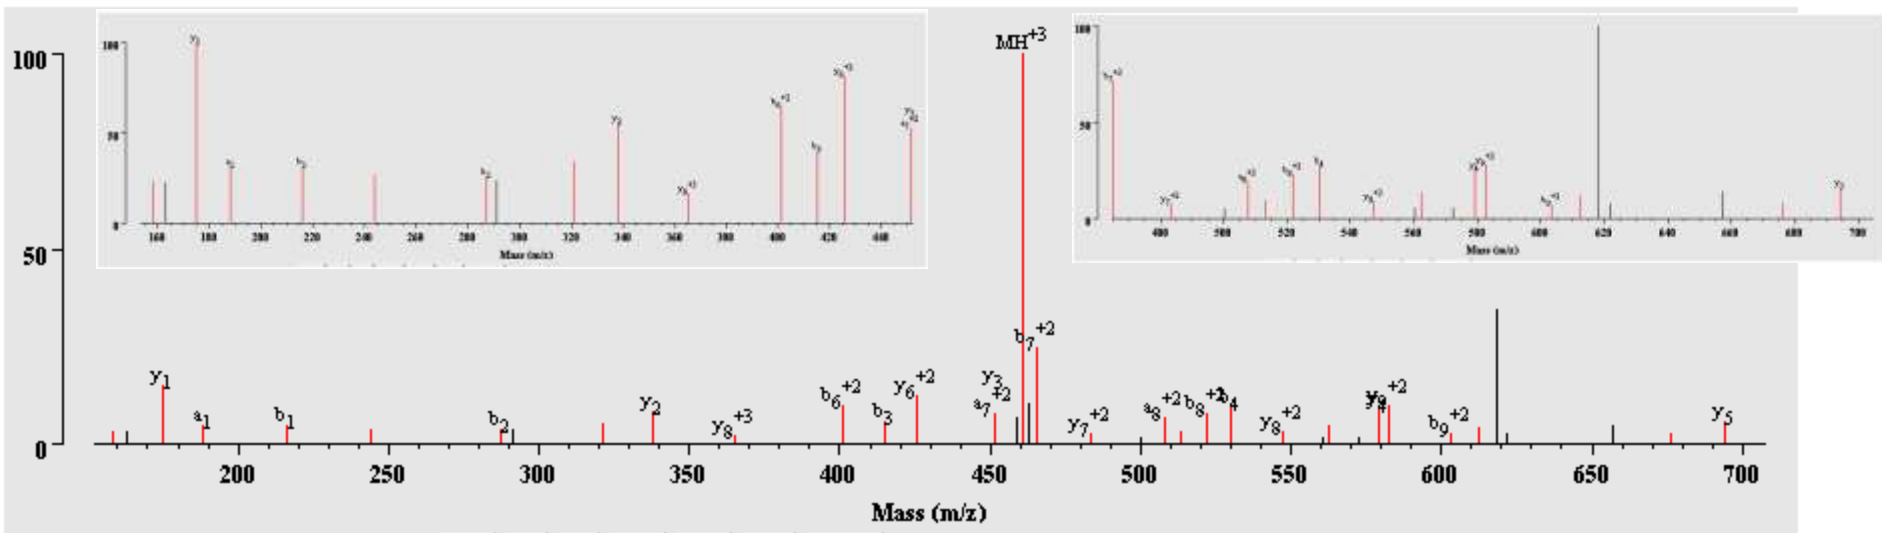

# VLVDQTTGLSR<sup>+2</sup>/(667.263<sup>+2</sup>/1333.5186)/P70372

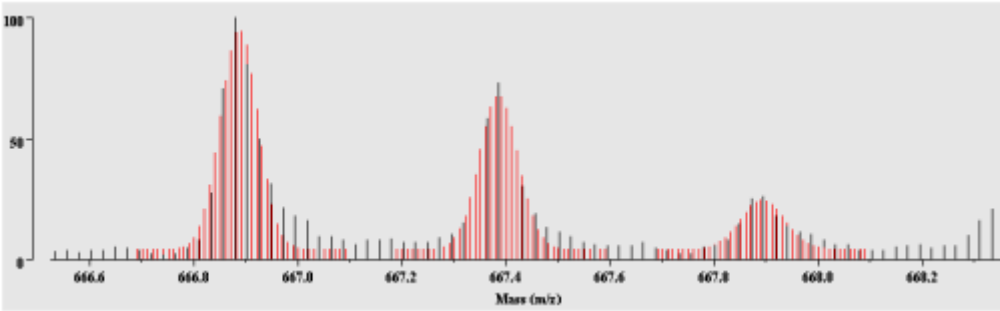

| b        | iTRAQ4plex | y     | y+2               |
|----------|------------|-------|-------------------|
| 244.1778 | 1V         | 11--- | ---               |
| 357.2618 | 2L         | 10    | 1089.59 545.2986  |
| 456.3302 | 3V         | 9     | 976.5058 488.7565 |
| 571.3572 | 4D         | 8     | 877.4374 439.2223 |
| 699.4158 | 5Q         | 7     | 762.4104 381.7089 |
| 800.4634 | 6T         | 6     | 634.3519 317.6796 |
| 901.5111 | 7T         | 5     | 533.3042 267.1557 |
| 958.5326 | 8G         | 4     | 432.2565 216.6319 |
| 1071.617 | 9L         | 3     | 375.235 188.1212  |
| 1158.649 | 10S        | 2     | 262.151 131.5791  |
| ---      | 11R        | 1     | 175.119 88.0631   |

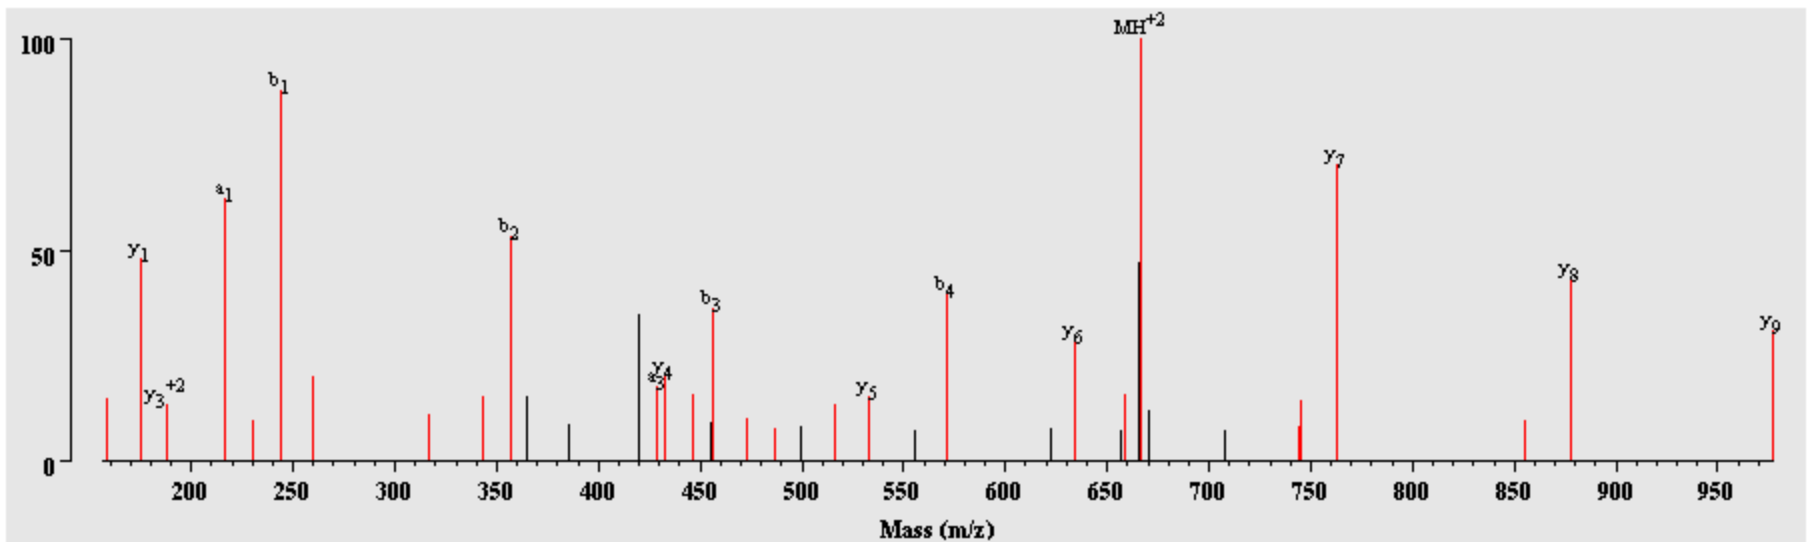

# AFGYGPLR<sup>+2</sup>/(594.6846<sup>+2</sup>/1188.3618)/P84104

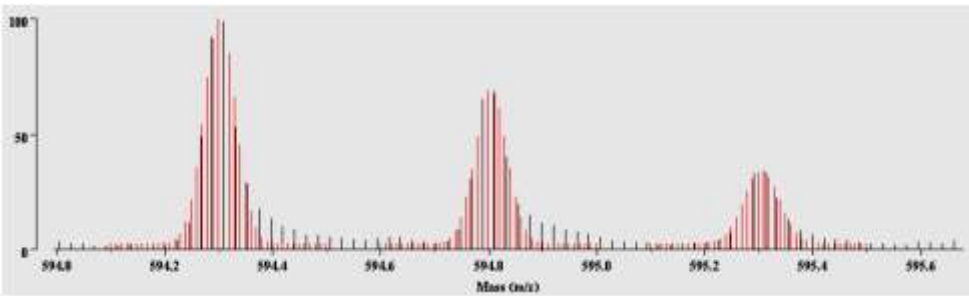

| b        | iTRAQ4plex | y    | y+2               |
|----------|------------|------|-------------------|
| 216.1465 | 1A         | 9--- | ---               |
| 363.2149 | 2F         | 8    | 972.4938 486.7505 |
| 420.2363 | 3G         | 7    | 825.4254 413.2163 |
| 583.2997 | 4Y         | 6    | 768.4039 384.7056 |
| 746.363  | 5Y         | 5    | 605.3406 303.1739 |
| 803.3845 | 6G         | 4    | 442.2772 221.6423 |
| 900.4372 | 7P         | 3    | 385.2558 193.1315 |
| 1013.521 | 8L         | 2    | 288.203 144.6051  |
| ---      | 9R         | 1    | 175.119 88.0631   |

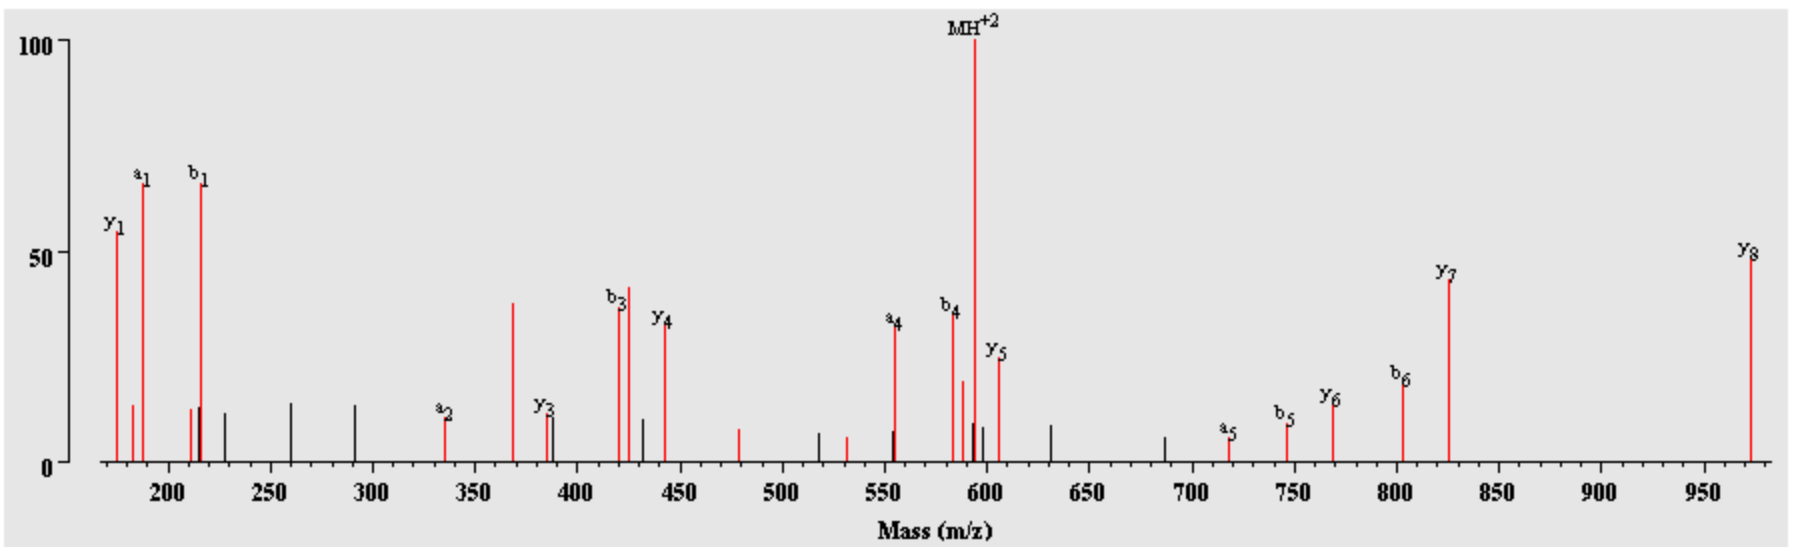

# SSPAAK(iTRAQ4)PGSTPSRPSSAK(iTRAQ4)<sup>+4</sup>/(537.2805<sup>+4</sup> /2146.0996)/Q3B8Q0

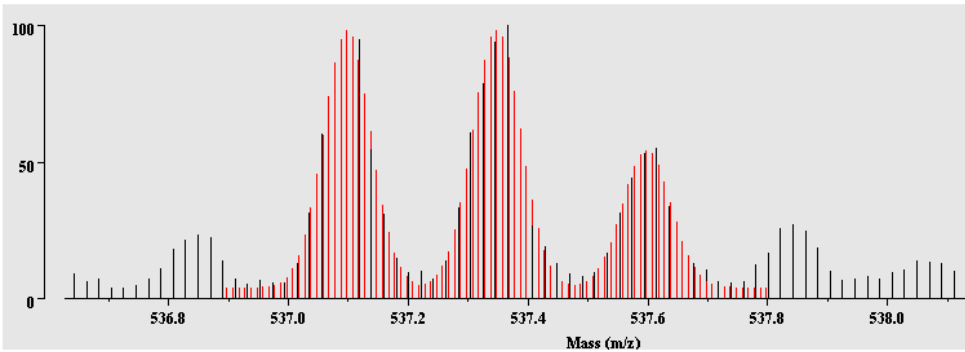

| b        | b+2      | iTRAQ4plex       | y  | y+2               |
|----------|----------|------------------|----|-------------------|
| 232.1414 | ---      | 1 S              | 18 | ---               |
| 319.1734 | ---      | 2 S              | 17 | 1914.065 957.536  |
| 416.2262 | ---      | 3 P              | 16 | 1827.033 914.02   |
| 487.2633 | ---      | 4 A              | 15 | 1729.98 865.4936  |
| 558.3004 | ---      | 5 A              | 14 | 1658.943 829.975  |
| 830.4974 | 415.7523 | 6 K(iTRAQ4plex)  | 13 | 1587.906 794.4565 |
| 927.5502 | 464.2787 | 7 P              | 12 | 1315.709 658.358  |
| 984.5716 | 492.7895 | 8 G              | 11 | 1218.656 609.8316 |
| 1071.604 | 536.3055 | 9 S              | 10 | 1161.634 581.3208 |
| 1172.651 | 586.8293 | 10 T             | 9  | 1074.602 537.8048 |
| 1269.704 | 635.3557 | 11 P             | 8  | 973.5547 487.281  |
| 1356.736 | 678.8717 | 12 S             | 7  | 876.5019 438.7546 |
| 1512.837 | 756.9223 | 13 R             | 6  | 789.4699 395.2386 |
| 1609.89  | 805.4486 | 14 P             | 5  | 633.3688 317.188  |
| 1696.922 | 848.9647 | 15 S             | 4  | 536.316 268.6617  |
| 1783.954 | 892.4807 | 16 S             | 3  | 449.284 225.1456  |
| 1854.991 | 927.9992 | 17 A             | 2  | 362.252 181.6296  |
| ---      | ---      | 18 K(iTRAQ4plex) | 1  | 291.2149 146.1111 |

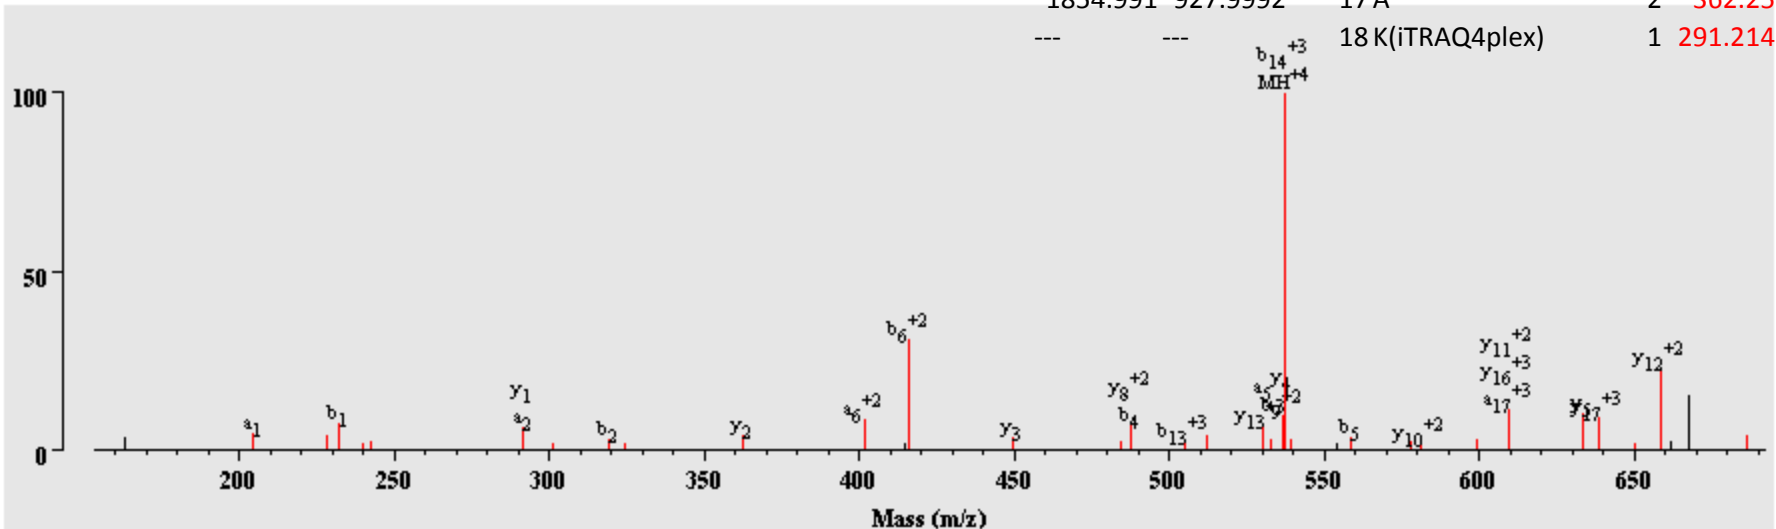

# VLFAPVR<sup>+2</sup>/(473.5856<sup>+2</sup>/946.1697)/Q3THX5

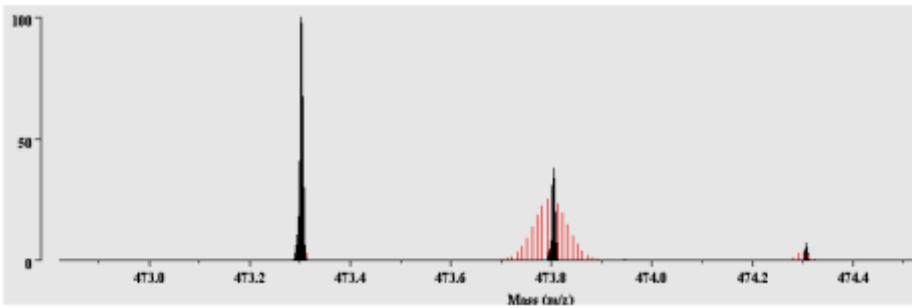

| b        | iTRAQ4plex | y          | y+2      |
|----------|------------|------------|----------|
| 244.1778 | 1 V        | 7 ---      | ---      |
| 357.2618 | 2 L        | 6 702.4297 | 351.7185 |
| 504.3302 | 3 F        | 5 589.3457 | 295.1765 |
| 575.3673 | 4 A        | 4 442.2772 | 221.6423 |
| 672.4201 | 5 P        | 3 371.2401 | 186.1237 |
| 771.4885 | 6 V        | 2 274.1874 | 137.5973 |
| ---      | 7 R        | 1 175.119  | 88.0631  |

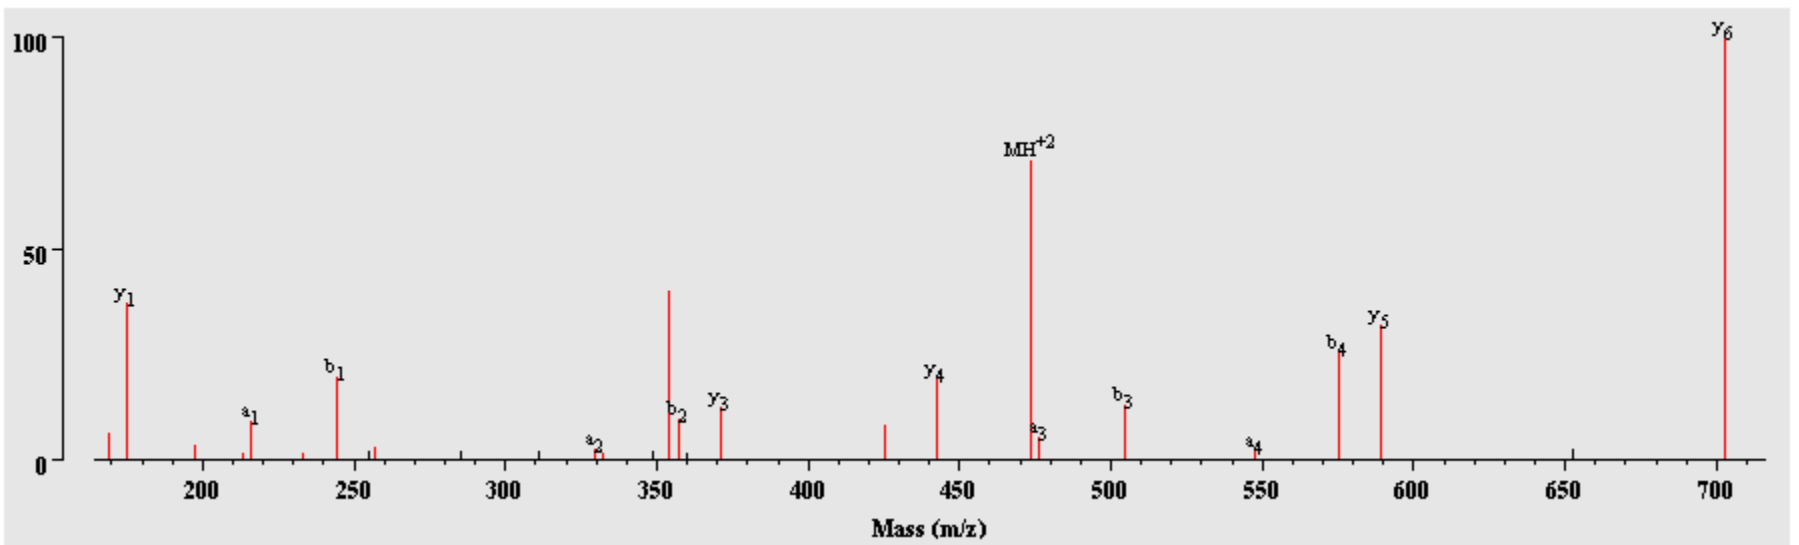

# ALAAGGVGSIVR<sup>+2</sup>/(608.2181<sup>+2</sup>/1215.4289)/Q3TK56

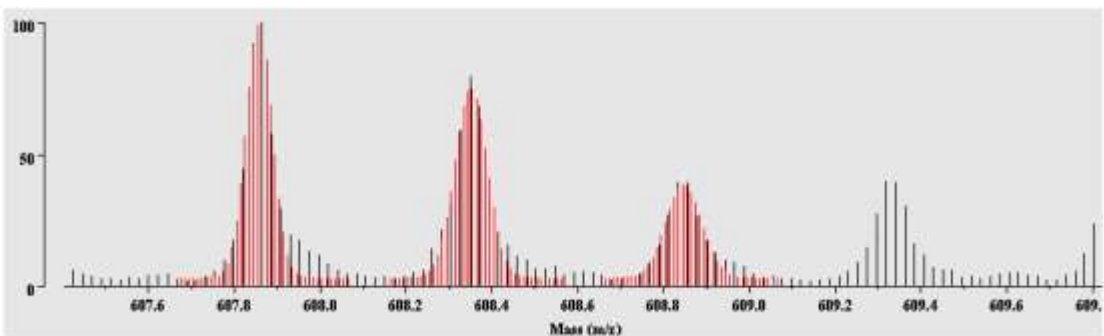

b

|          | iTRAQ4plex | y           | y+2      |
|----------|------------|-------------|----------|
| 216.1465 | 1A         | 12 ---      | ---      |
| 329.2305 | 2L         | 11 999.5946 | 500.3009 |
| 400.2676 | 3A         | 10 886.5105 | 443.7589 |
| 471.3047 | 4A         | 9 815.4734  | 408.2403 |
| 528.3262 | 5G         | 8 744.4363  | 372.7218 |
| 585.3477 | 6G         | 7 687.4148  | 344.211  |
| 684.4161 | 7V         | 6 630.3933  | 315.7003 |
| 741.4375 | 8G         | 5 531.3249  | 266.1661 |
| 828.4696 | 9S         | 4 474.3035  | 237.6554 |
| 941.5536 | 10I        | 3 387.2714  | 194.1394 |
| 1040.622 | 11V        | 2 274.1874  | 137.5973 |
| ---      | 12R        | 1 175.119   | 88.0631  |

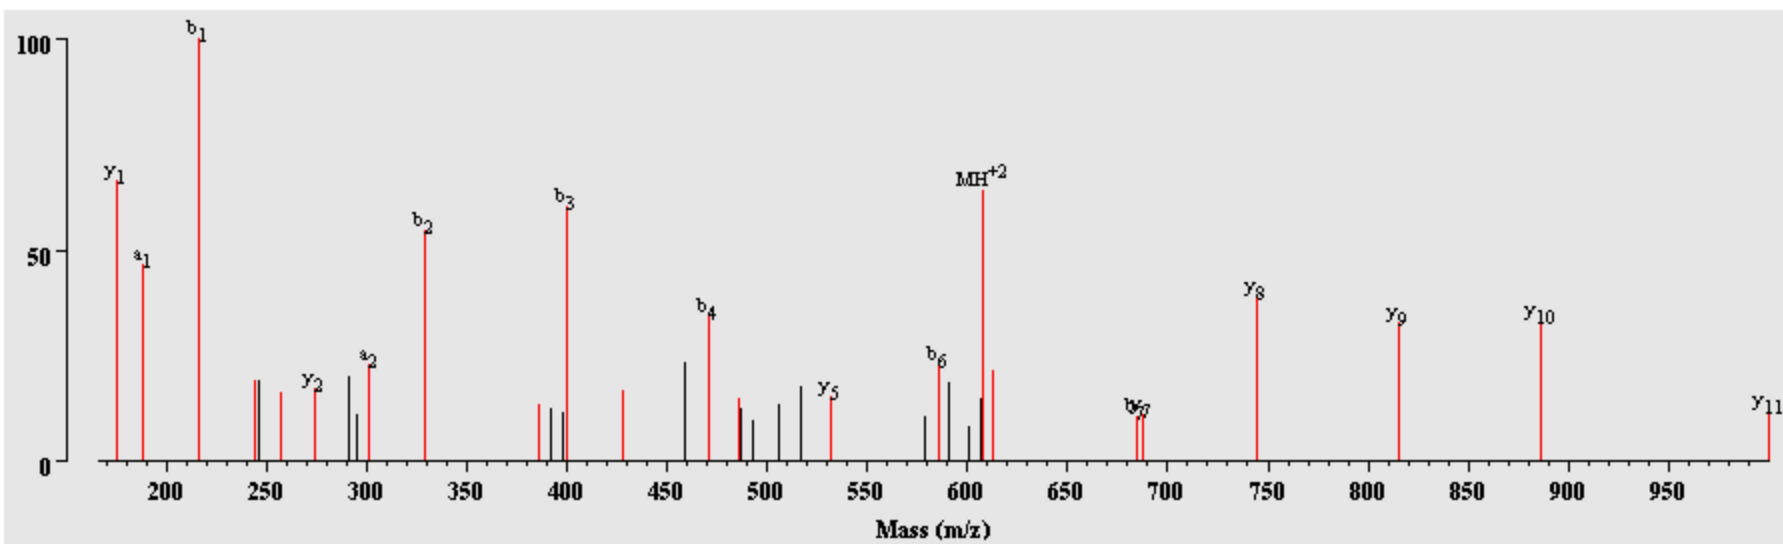



# RIVAVTGAEAQK(iTRAQ4plex)<sup>+3</sup>/(511.2169<sup>+3</sup>/1531.6357)/ Q3TZ32

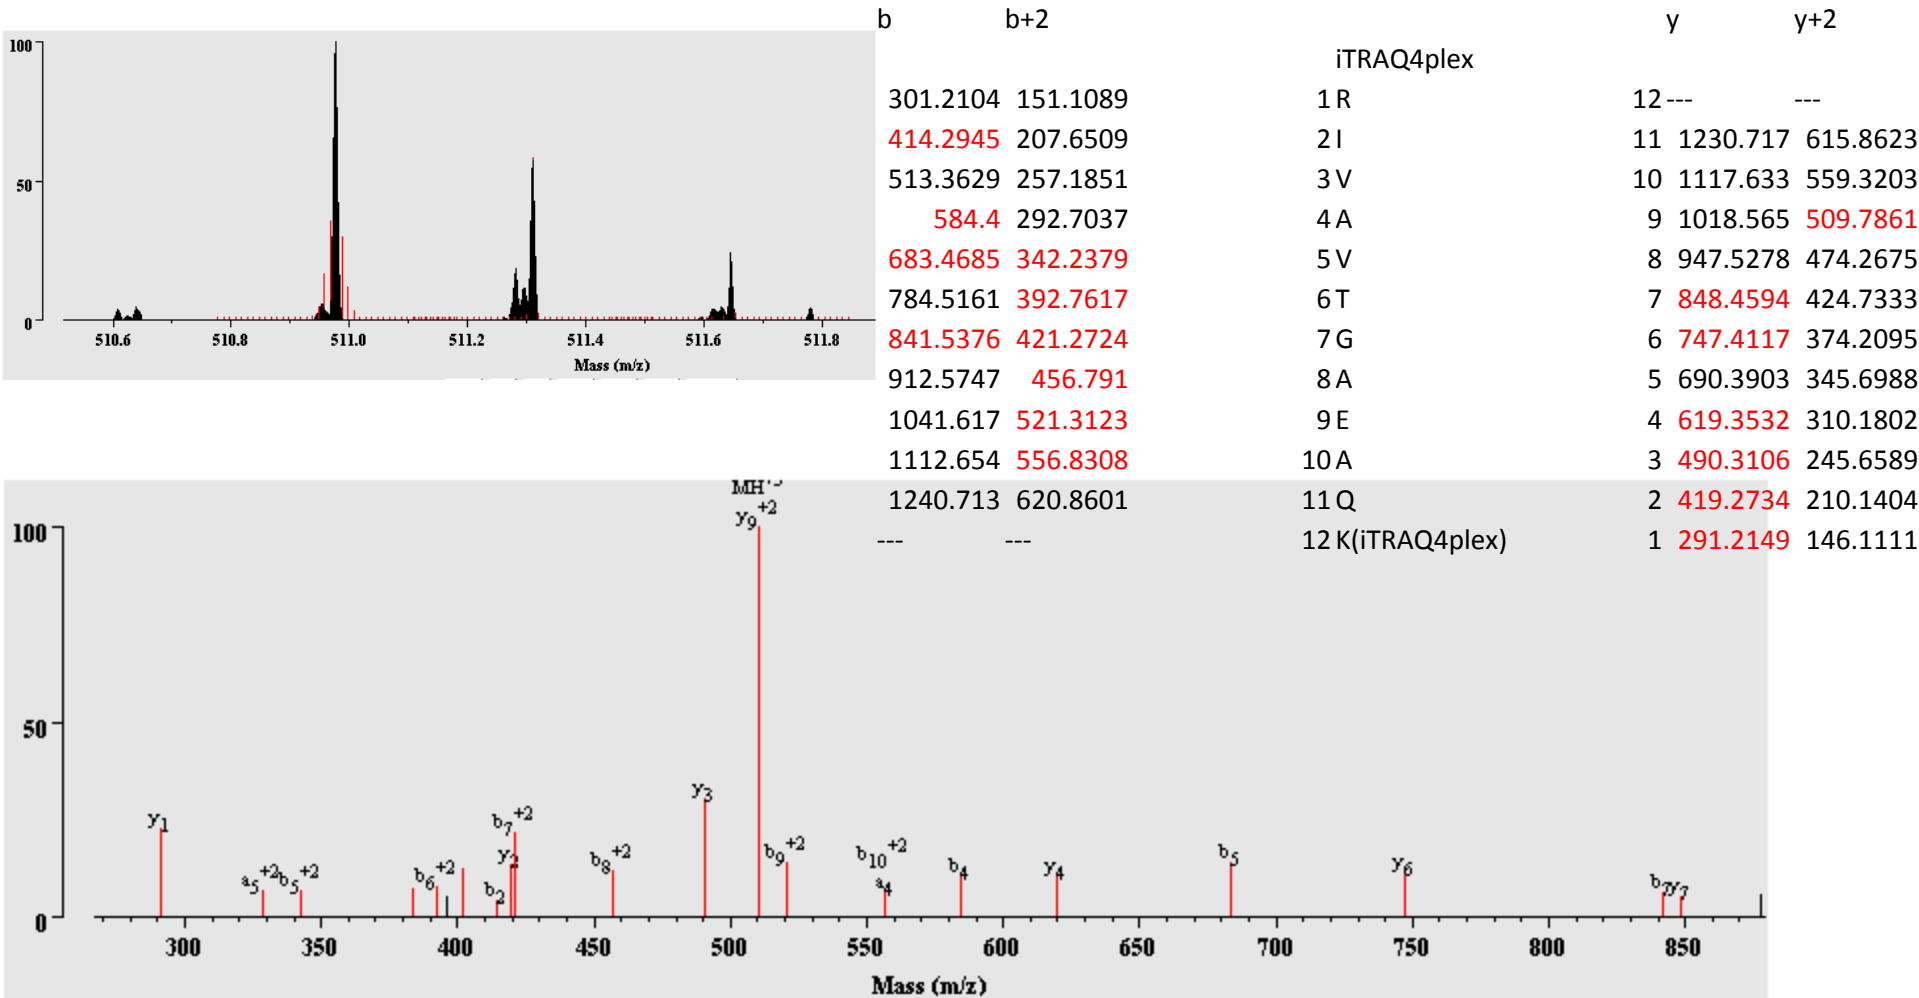

# VAPAPARPSGPK(iTRAQ4)<sup>+3</sup>/(508.5435<sup>+3</sup>/1523.6156)/Q3U4S9

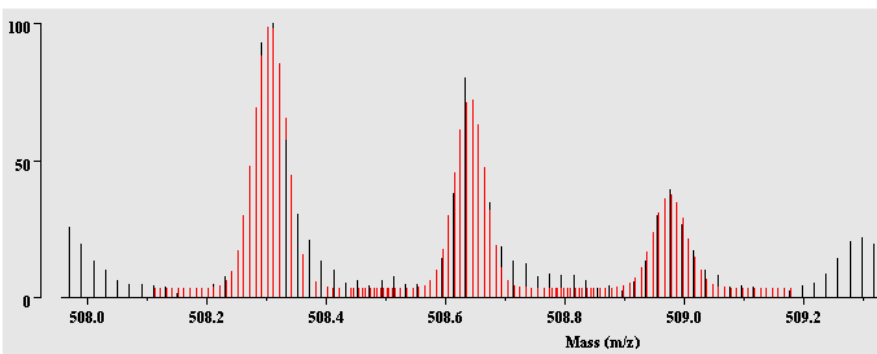

| b        | b+2      | iTRAQ4plex       | y  | y+2               |
|----------|----------|------------------|----|-------------------|
| 244.1778 | ---      | 1 V              | 13 | ---               |
| 315.2149 | ---      | 2 A              | 12 | 1279.724 640.3656 |
| 412.2676 | ---      | 3 P              | 11 | 1208.687 604.847  |
| 483.3047 | ---      | 4 A              | 10 | 1111.634 556.3206 |
| 580.3575 | ---      | 5 P              | 9  | 1040.597 520.8021 |
| 651.3946 | ---      | 6 A              | 8  | 943.5441 472.2757 |
| 807.4957 | 404.2515 | 7 R              | 7  | 872.507 436.7572  |
| 904.5485 | 452.7779 | 8 P              | 6  | 716.4059 358.7066 |
| 991.5805 | 496.2939 | 9 S              | 5  | 619.3532 310.1802 |
| 1048.602 | 524.8046 | 10 G             | 4  | 532.3211 266.6642 |
| 1145.655 | 573.331  | 11 P             | 3  | 475.2997 238.1535 |
| 1232.687 | 616.847  | 12 S             | 2  | 378.2469 189.6271 |
| ---      | ---      | 13 K(iTRAQ4plex) | 1  | 291.2149 146.1111 |

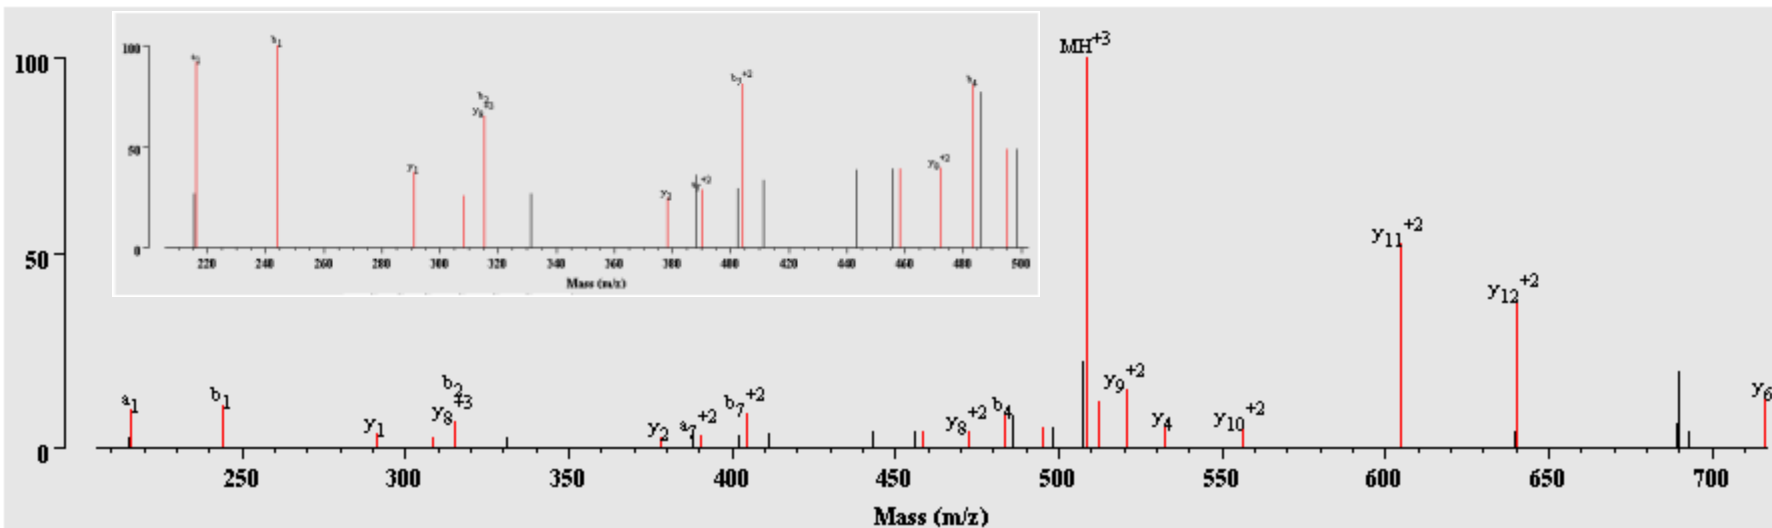

# M(Met-loss)VGVK(iTRAQ4)PVGSDPDFQPELSGAGSR<sup>+4</sup>/ (829.207<sup>+4</sup>/2488.6061)/Q3U8R9

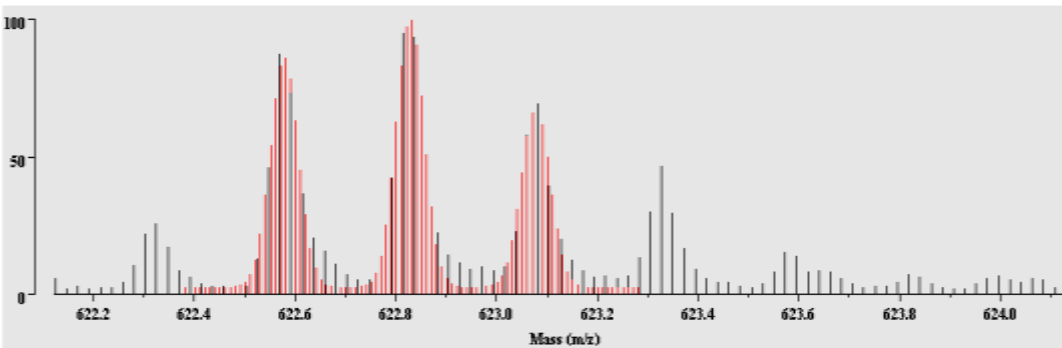

| b        | b+2      | iTRAQ4plex      | y  | y+2               |
|----------|----------|-----------------|----|-------------------|
| 145.1093 | ---      | 1 M(Met-loss)   | 23 | ---               |
| 244.1778 | ---      | 2 V             | 22 | 2343.206 1172.107 |
| 301.1992 | ---      | 3 G             | 21 | 2244.138 1122.573 |
| 400.2676 | ---      | 4 V             | 20 | 2187.116 1094.062 |
| 672.4647 | 336.736  | 5 K(iTRAQ4plex) | 19 | 2088.048 1044.528 |
| 769.5174 | 385.2623 | 6 P             | 18 | 1815.851 908.429  |
| 868.5858 | 434.7966 | 7 V             | 17 | 1718.798 859.9026 |
| 925.6073 | 463.3073 | 8 G             | 16 | 1619.73 810.3684  |
| 1012.639 | 506.8233 | 9 S             | 15 | 1562.708 781.8577 |
| 1127.666 | 564.3368 | 10 D            | 14 | 1475.676 738.3417 |
| 1224.719 | 612.8632 | 11 P            | 13 | 1360.649 680.8282 |
| 1339.746 | 670.3766 | 12 D            | 12 | 1263.596 632.3018 |
| 1486.814 | 743.9108 | 13 F            | 11 | 1148.57 574.7884  |
| 1614.873 | 807.9401 | 14 Q            | 10 | 1001.501 501.2542 |
| 1711.926 | 856.4665 | 15 P            | 9  | 873.4425 437.2249 |
| 1840.968 | 920.9878 | 16 E            | 8  | 776.3897 388.6985 |
| 1954.052 | 977.5298 | 17 L            | 7  | 647.3471 324.1772 |
| 2041.084 | 1021.046 | 18 S            | 6  | 534.2631 267.6352 |
| 2098.106 | 1049.557 | 19 G            | 5  | 447.231 224.1191  |
| 2169.143 | 1085.075 | 20 A            | 4  | 390.2096 195.6084 |
| 2226.165 | 1113.586 | 21 G            | 3  | 319.1724 160.0899 |
| 2313.197 | 1157.102 | 22 S            | 2  | 262.151 131.5791  |
| ---      | ---      | 23 R            | 1  | 175.119 88.0631   |

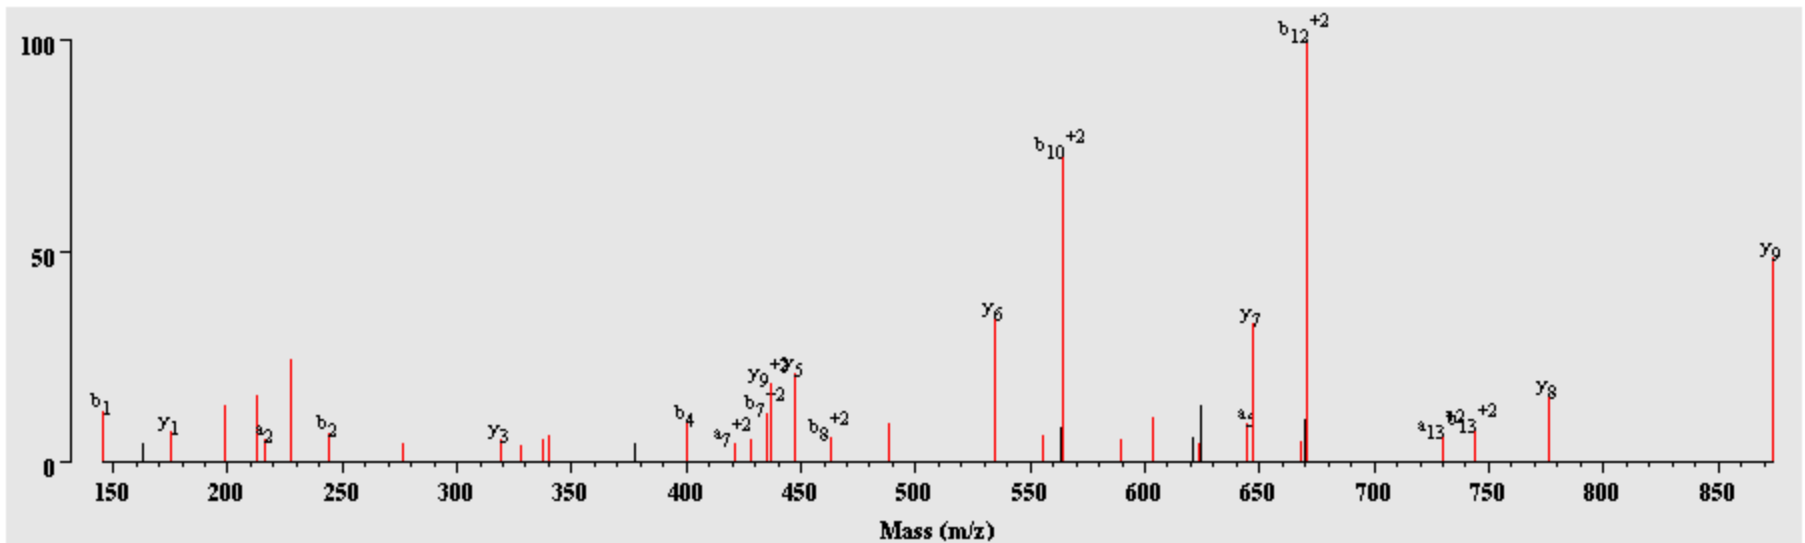

# ASLISAVSDK(iTRAQ4)LR<sup>+3</sup>/(516.8928<sup>+3</sup>/1548.6634)/Q3UCW0

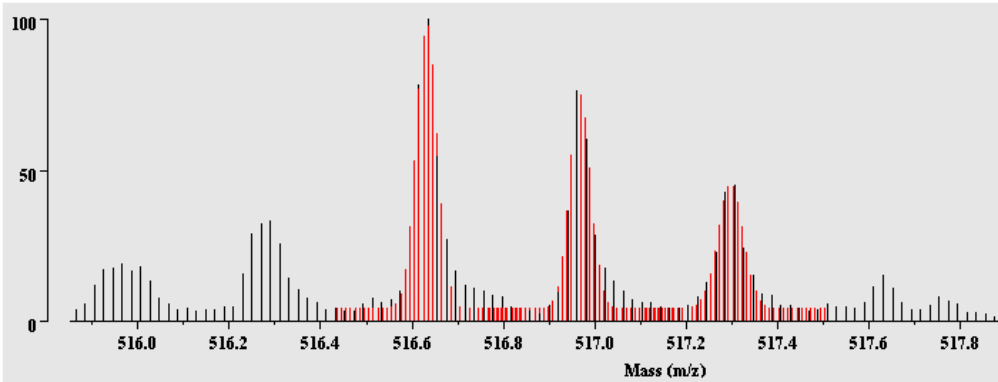

| b        | b+2      | iTRAQ4plex       | y  | y+2               |
|----------|----------|------------------|----|-------------------|
| 216.1465 | ---      | 1 A              | 12 | ---               |
| 303.1785 | ---      | 2 S              | 11 | 1332.797 666.902  |
| 416.2625 | ---      | 3 L              | 10 | 1245.765 623.386  |
| 529.3466 | ---      | 4 I              | 9  | 1132.681 566.844  |
| 616.3786 | ---      | 5 S              | 8  | 1019.597 510.3019 |
| 687.4158 | ---      | 6 A              | 7  | 932.5645 466.7859 |
| 786.4842 | ---      | 7 V              | 6  | 861.5274 431.2674 |
| 873.5162 | ---      | 8 S              | 5  | 762.459 381.7331  |
| 988.5431 | ---      | 9 D              | 4  | 675.427 338.2171  |
| 1260.74  | 630.8737 | 10 K(iTRAQ4plex) | 3  | 560.4 280.7037    |
| 1373.824 | 687.4158 | 11 L             | 2  | 288.203 144.6051  |
| ---      | ---      | 12 R             | 1  | 175.119 88.063    |

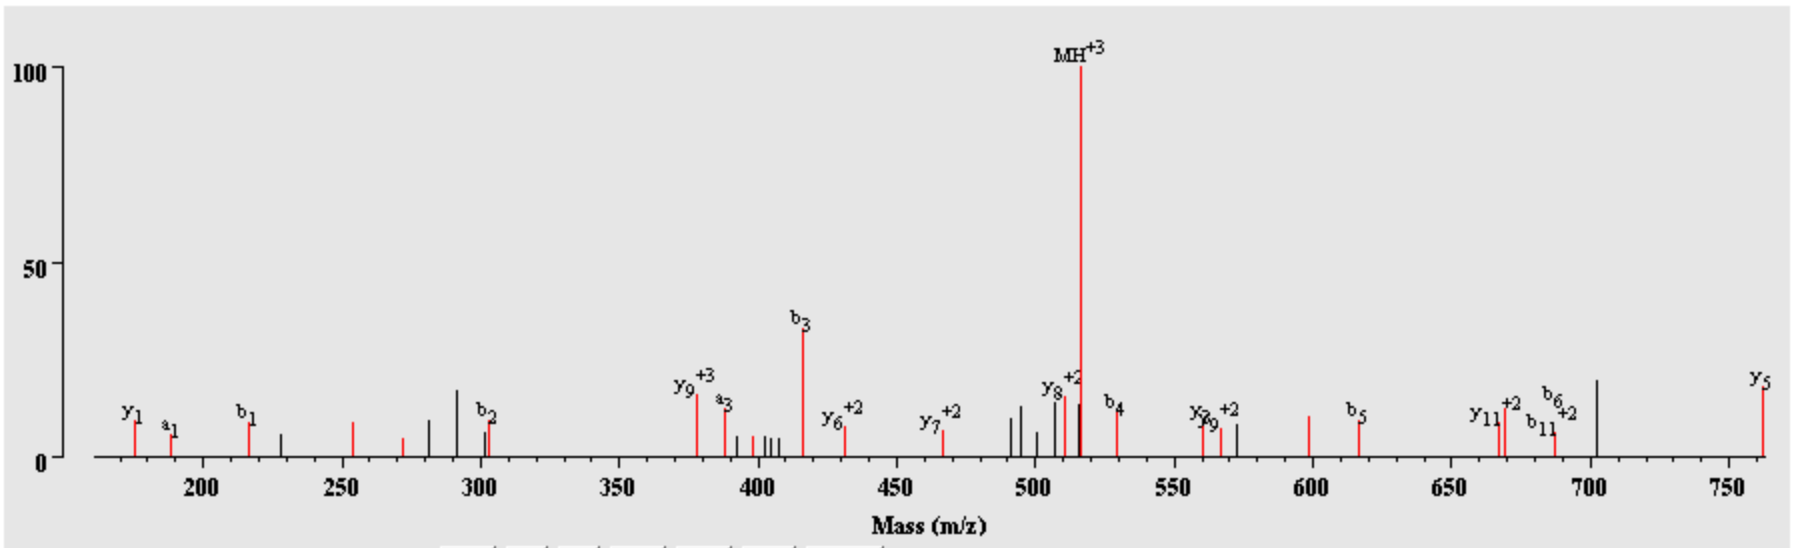

# K(iTRAQ4)QAVLLK(iTRAQ4)EK(iTRAQ4)<sup>+4</sup>/ (409.1435<sup>+4</sup>/1633.5516)/Q5BKC4

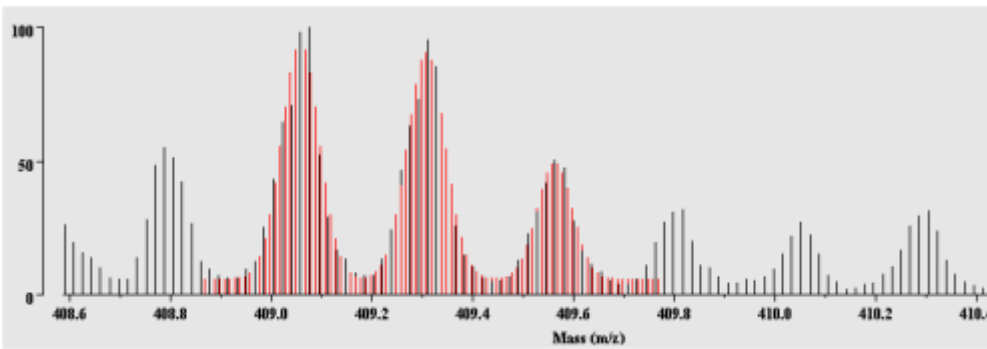

| b        | b+2      | iTRAQ4plex      | y          | y+2      |
|----------|----------|-----------------|------------|----------|
| 417.3064 | 209.1568 | 1 K(iTRAQ4plex) | 9 ---      | ---      |
| 545.3649 | 273.1861 | 2 Q             | 8 1216.787 | 608.897  |
| 616.4021 | 308.7047 | 3 A             | 7 1088.728 | 544.8677 |
| 715.4705 | 358.2389 | 4 V             | 6 1017.691 | 509.3492 |
| 828.5545 | 414.7809 | 5 L             | 5 918.6226 | 459.8149 |
| 941.6386 | 471.3229 | 6 L             | 4 805.5385 | 403.2729 |
| 1213.836 | 607.4214 | 7 K(iTRAQ4plex) | 3 692.4545 | 346.7309 |
| 1342.878 | 671.9427 | 8 E             | 2 420.2575 | 210.6324 |
| ---      | ---      | 9 K(iTRAQ4plex) | 1 291.2149 | 146.1111 |

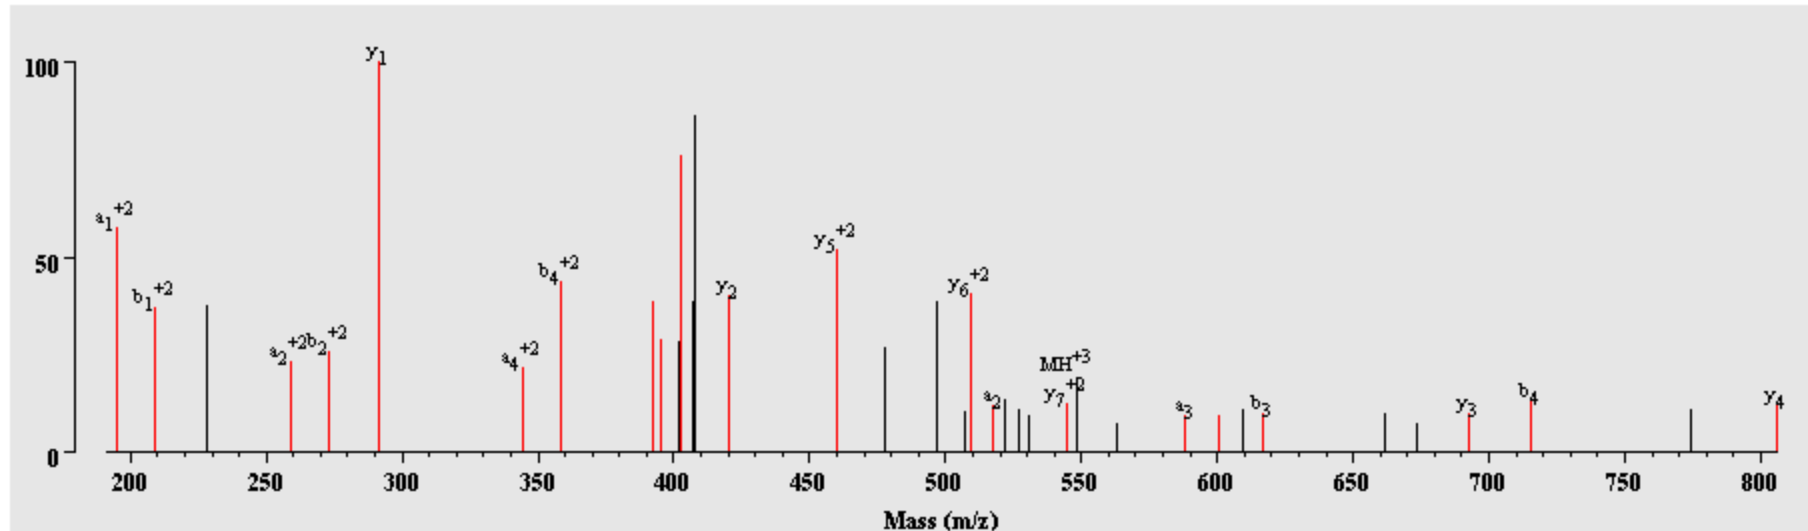

# SVPEM(Ox)DPAATIPR<sup>+3</sup>/(515.5376<sup>+3</sup>/1544.5978)/Q5SRX1

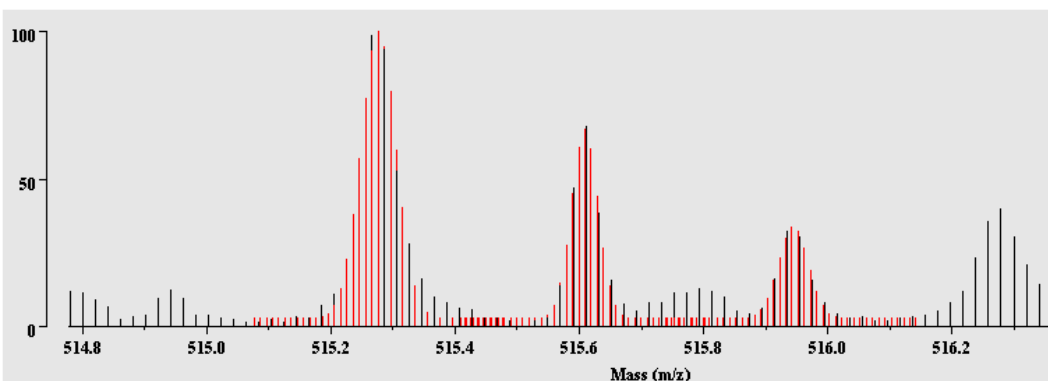

| b        | iTRAQ4plex    | y     | y+2               |
|----------|---------------|-------|-------------------|
| 232.1414 | 1S            | 13--- | ---               |
| 331.2098 | 2V            | 12    | 1312.657 656.8319 |
| 428.2625 | 3P            | 11    | 1213.588 607.2977 |
| 557.3051 | 4E            | 10    | 1116.535 558.7713 |
| 704.3405 | 5M(Oxidation) | 9     | 987.4928 494.25   |
| 819.3675 | 6D            | 8     | 840.4574 420.7323 |
| 916.4202 | 7P            | 7     | 725.4304 363.2189 |
| 987.4574 | 8A            | 6     | 628.3777 314.6925 |
| 1058.495 | 9A            | 5     | 557.3406 279.1739 |
| 1159.542 | 10T           | 4     | 486.3035 243.6554 |
| 1272.626 | 11I           | 3     | 385.2558 193.1315 |
| 1369.679 | 12P           | 2     | 272.1717 136.5895 |
| ---      | 13R           | 1     | 175.119 88.0631   |

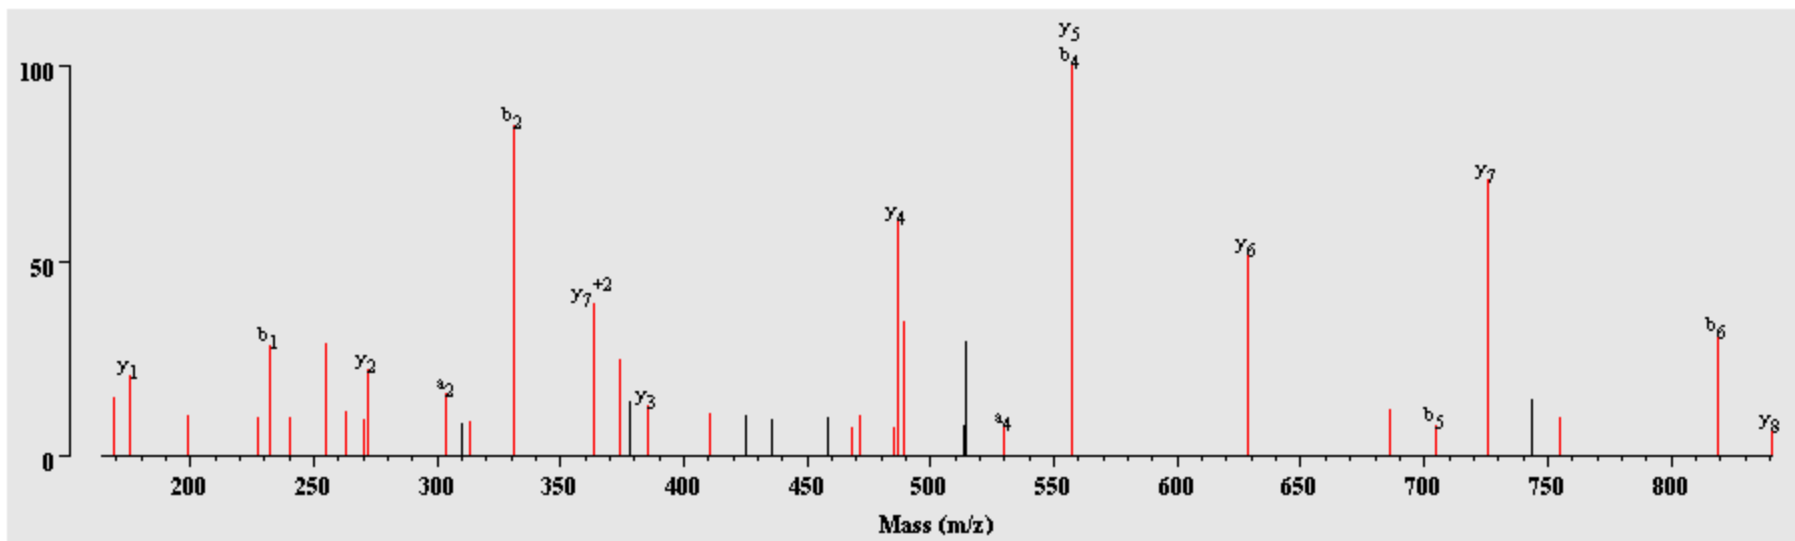

# IGAC(Carbamidomethyl)VSGERLTGAC(Carbamidomethyl)GLNGR<sup>+3</sup>/ (698.3574<sup>+3</sup>/2093.0574)/Q62714

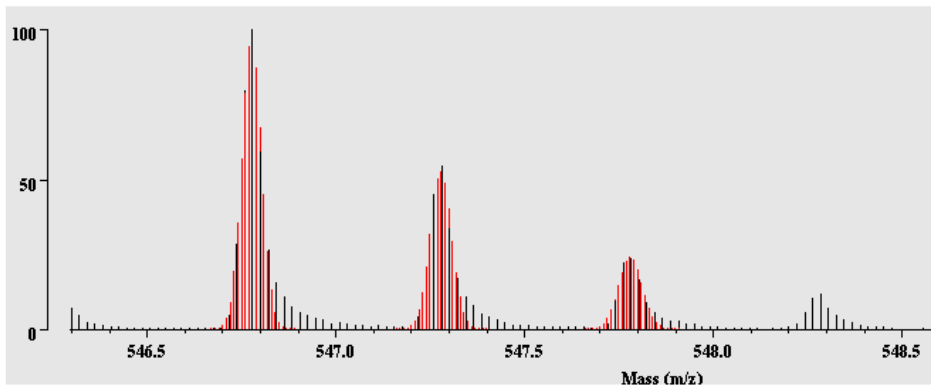

| b        | b+2              | iTRAQ4plex                | y  | y+2               |
|----------|------------------|---------------------------|----|-------------------|
| 258.1934 | ---              | 1I                        | 19 | ---               |
| 315.2149 | ---              | 2G                        | 18 | 1834.865 917.936  |
| 386.252  | ---              | 3A                        | 17 | 1777.843 889.4252 |
| 546.2826 | ---              | C(Carbamidome<br>4 thyl)  | 16 | 1706.806 853.9067 |
| 645.351  | ---              | 5V                        | 15 | 1546.775 773.8914 |
| 732.3831 | ---              | 6S                        | 14 | 1447.707 724.3572 |
| 789.4045 | ---              | 7G                        | 13 | 1360.675 680.8411 |
| 918.4471 | ---              | 8E                        | 12 | 1303.654 652.3304 |
| 1074.548 | 537.7778         | 9R                        | 11 | 1174.611 587.8091 |
| 1187.632 | 594.3198         | 10L                       | 10 | 1018.51 509.7586  |
| 1288.68  | 644.8436         | 11T                       | 9  | 905.4258 453.2165 |
| 1345.701 | 673.3544         | 12G                       | 8  | 804.3781 402.6927 |
| 1416.739 | 708.8729         | 13A                       | 7  | 747.3566 374.182  |
| 1576.769 | 788.8882         | C(Carbamidome<br>14 thyl) | 6  | 676.3195 338.6634 |
| 1633.791 | 817.399          | 15G                       | 5  | 516.2889 258.6481 |
| 1746.875 | 873.941          | 16L                       | 4  | 459.2674 230.1373 |
| 1860.918 | 930.9625         | 17N                       | 3  | 346.1833 173.5953 |
| 1917.939 | 959.4732         | 18G                       | 2  | 232.1404 116.5738 |
| ---      | MH <sup>+3</sup> | 19R                       | 1  | 175.119 88.0631   |

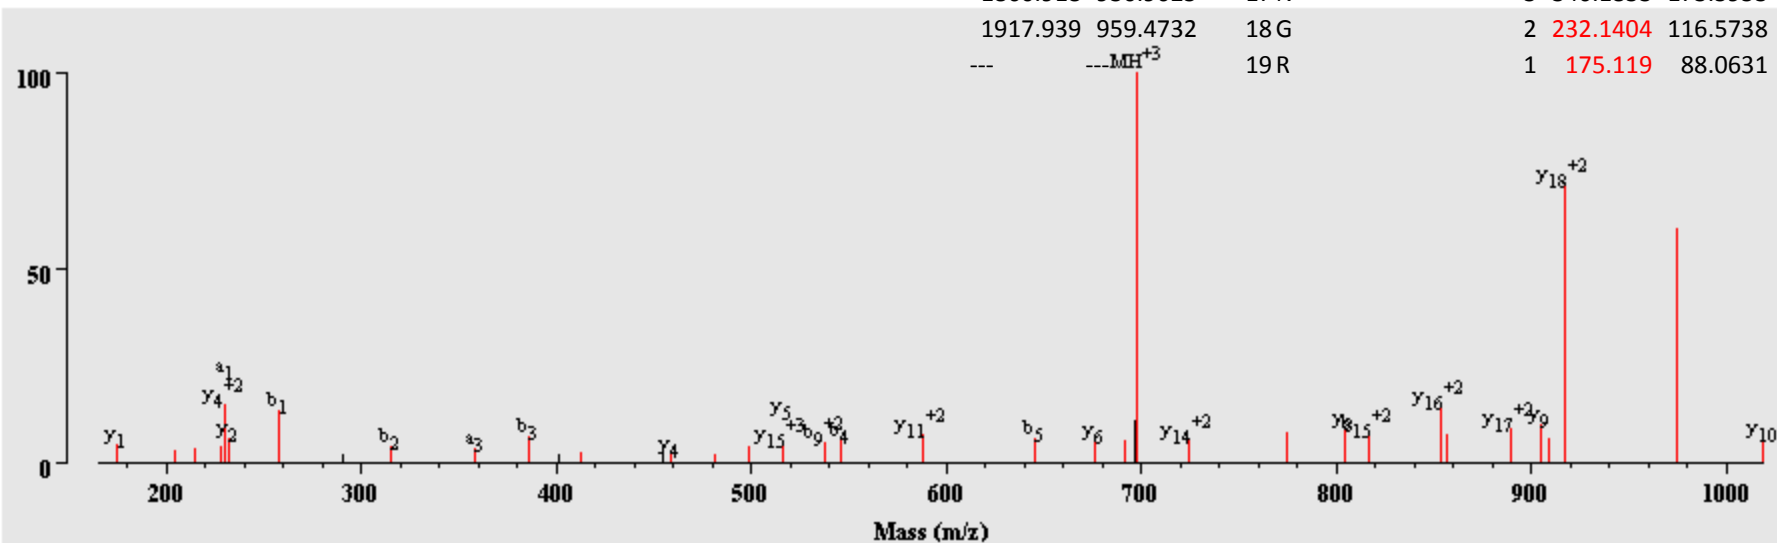

# ELPPQVHLLTLAR<sup>+3</sup>/(544.6559<sup>+3</sup>/1631.9528)/Q6P762

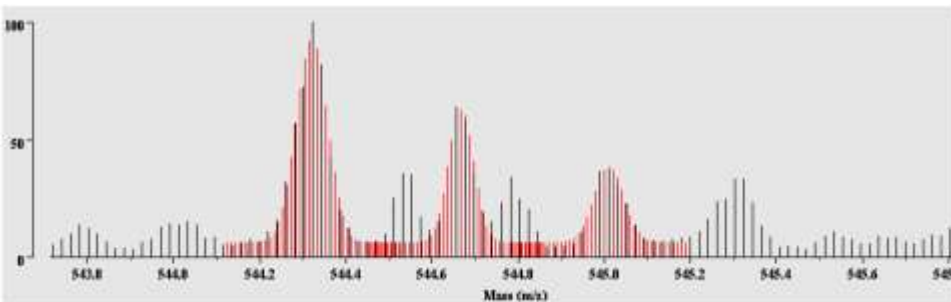

| b        | b+2             | iTRAQ4plex | y  | y+2                      |
|----------|-----------------|------------|----|--------------------------|
| 274.1519 | ---             | 1 E        | 13 | ---                      |
| 387.236  | ---             | 2 L        | 12 | 1357.831 679.4194        |
| 484.2888 | ---             | 3 P        | 11 | 1244.747 <b>622.8773</b> |
| 581.3415 | ---             | 4 P        | 10 | 1147.695 574.3509        |
| 709.4001 | ---             | 5 Q        | 9  | 1050.642 525.8246        |
| 808.4685 | ---             | 6 V        | 8  | 922.5833 461.7953        |
| 945.5274 | <b>473.2674</b> | 7 H        | 7  | <b>823.5148 412.2611</b> |
| 1058.612 | <b>529.8094</b> | 8 L        | 6  | <b>686.4559</b> 343.7316 |
| 1171.696 | 586.3514        | 9 L        | 5  | <b>573.3719</b> 287.1896 |
| 1272.743 | 636.8753        | 10 T       | 4  | <b>460.2878</b> 230.6475 |
| 1385.827 | 693.4173        | 11 L       | 3  | <b>359.2401</b> 180.1237 |
| 1456.864 | 728.9358        | 12 A       | 2  | <b>246.1561</b> 123.5817 |
| ---      | ---             | 13 R       | 1  | <b>175.119</b> 88.0631   |

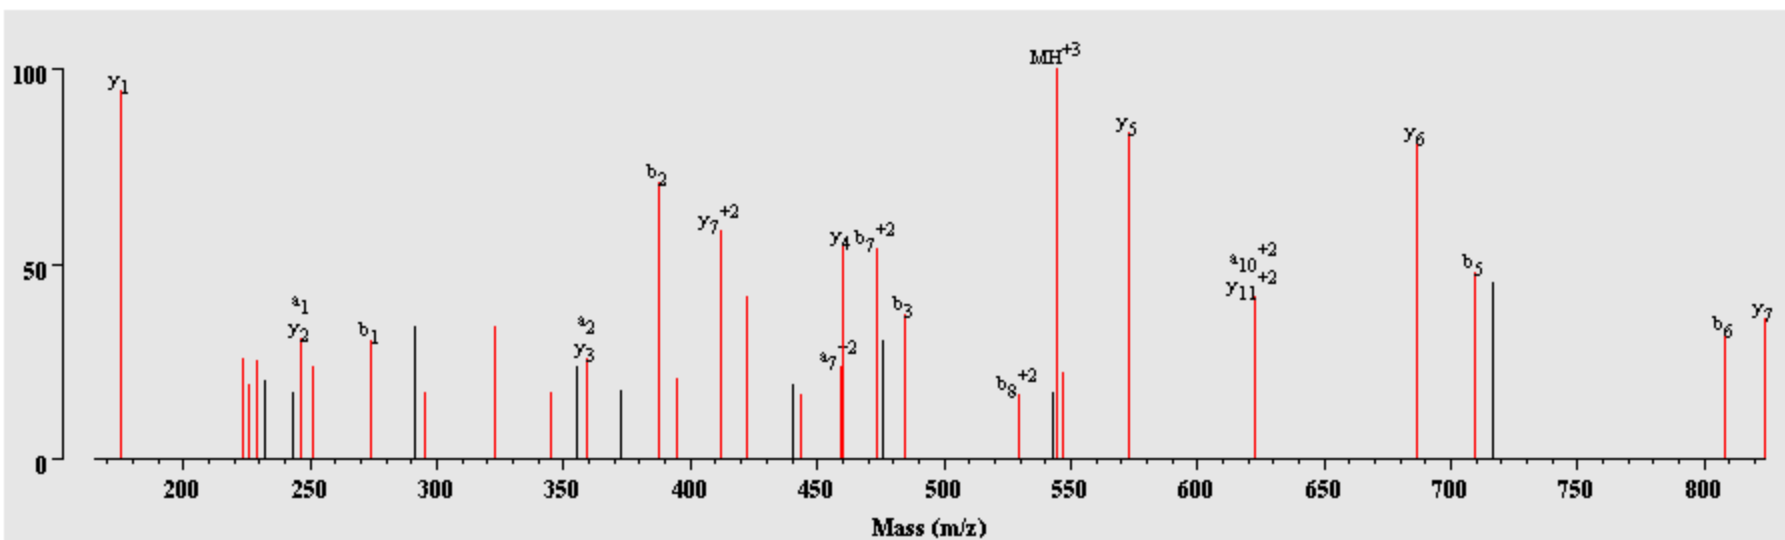



# SHEGETAYIR<sup>3</sup>/(436.4702<sup>3</sup>/1307.3959)/Q6PDM2

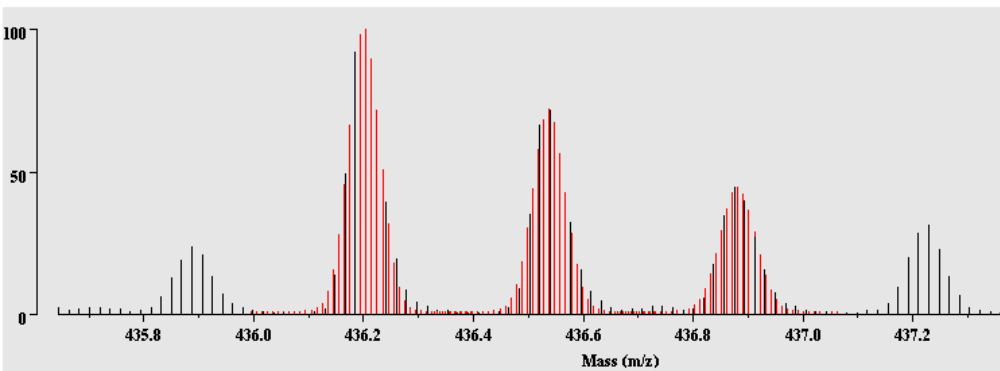

| b        | b+2      | iTRAQ4plex | y  | y+2               |
|----------|----------|------------|----|-------------------|
| 232.1414 | ---      | 1S         | 10 | ---               |
| 369.2003 | 185.1038 | 2H         | 9  | 1075.517 538.262  |
| 498.2429 | 249.6251 | 3E         | 8  | 938.4578 469.7325 |
| 555.2643 | 278.1358 | 4G         | 7  | 809.4152 405.2112 |
| 684.3069 | 342.6571 | 5E         | 6  | 752.3937 376.7005 |
| 785.3546 | 393.1809 | 6T         | 5  | 623.3511 312.1792 |
| 856.3917 | 428.6995 | 7A         | 4  | 522.3035 261.6554 |
| 1019.455 | 510.2312 | 8Y         | 3  | 451.2663 226.1368 |
| 1132.539 | 566.7732 | 9I         | 2  | 288.203 144.6051  |
| ---      | ---      | 10R        | 1  | 175.119 88.0631   |

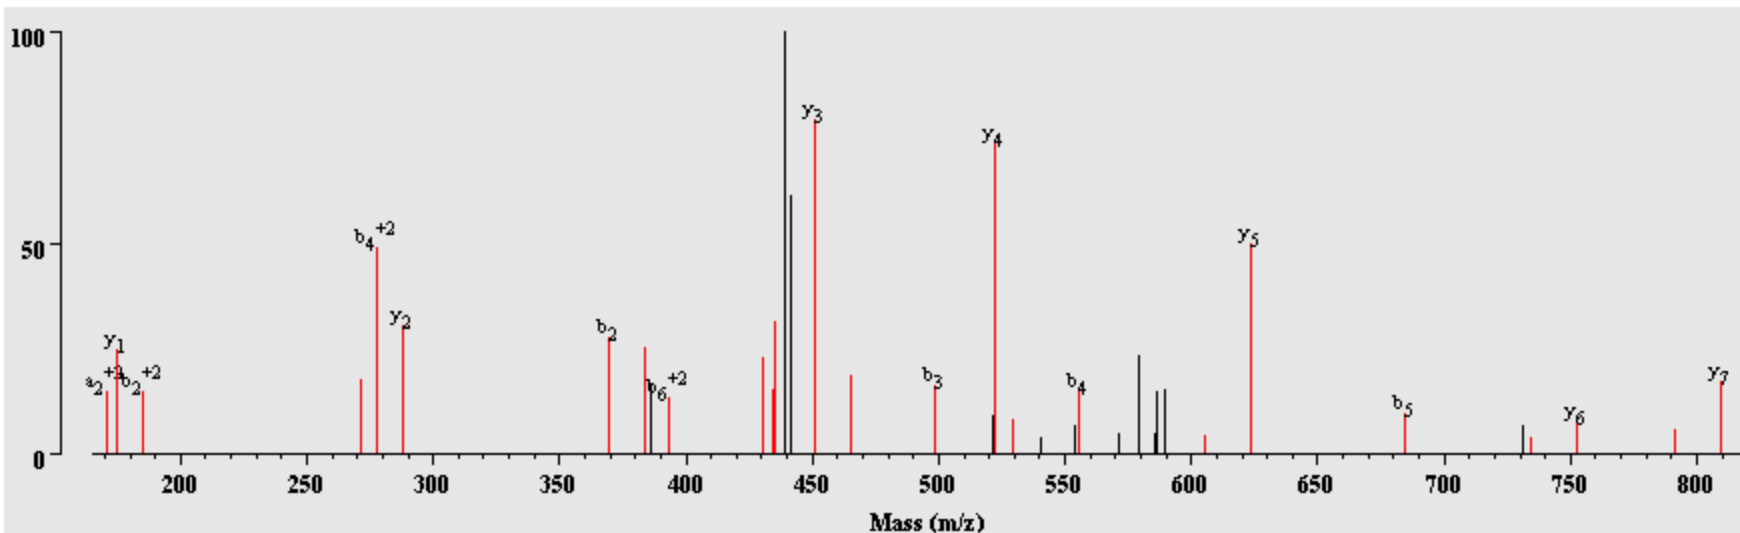

# TLAGDVHIVR+3/(409.1463+3/1225.422)/Q9QZ88

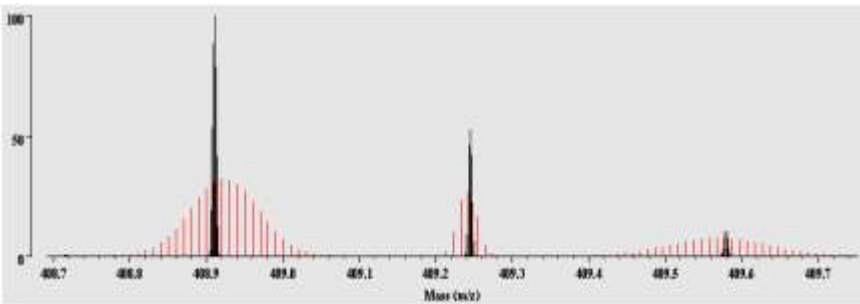

| b        | b+2      | iTRAQ4plex | y  | y+2               |
|----------|----------|------------|----|-------------------|
| 246.157  | ---      | 1T         | 10 | ---               |
| 359.2411 | ---      | 2L         | 9  | 979.5683 490.2878 |
| 430.2782 | ---      | 3A         | 8  | 866.4843 433.7458 |
| 487.2997 | ---      | 4G         | 7  | 795.4472 398.2272 |
| 602.3266 | ---      | 5D         | 6  | 738.4257 369.7165 |
| 701.395  | ---      | 6V         | 5  | 623.3988 312.203  |
| 838.4539 | 419.7306 | 7H         | 4  | 524.3303 262.6688 |
| 951.538  | 476.2726 | 8I         | 3  | 387.2714 194.1394 |
| 1050.606 | 525.8068 | 9V         | 2  | 274.1874 137.5973 |
| ---      | ---      | 10R        | 1  | 175.119 88.0631   |

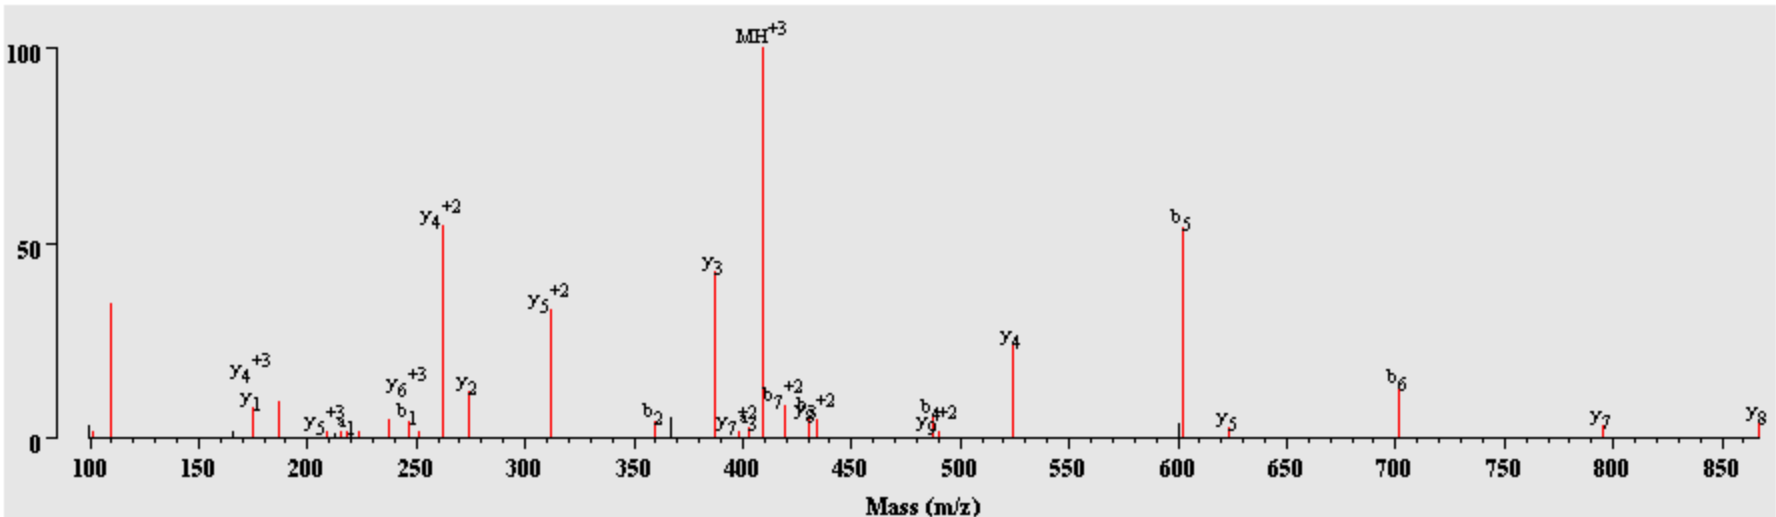

Supplement: supp_M900369-MCP200_Michaelevski_Supplementary_Spectra.pdf [file supp_M900369-MCP200_Michaelevski_Supplementary_Spectra.pdf]
